# Supplementary material for: D.H. Lawrence and fictional representations of blood-consciousness
Source: Royal Society of Chemistry journal article supplement (doi:10.1039/d0ob01725f), 2014-07-01
Supplement: d0ob01725f1.pdf [file d0ob01725f1.pdf]

## Supporting information

### Enantioselective Addition of Thiols to Trifluoromethyl ketimines: synthesis of *N,S*-ketals

Xiaonan Wang, Yuan Gao, Zhonglin Wei, Jungang Cao, Dapeng Liang, Yingjie Lin, and Haifeng Duan

Department of Organic Chemistry, College of Chemistry, Jilin University, 2699 Qianjin Street,  
Changchun 130012, China

E-mail: [linyij@jlu.edu.cn](mailto:linyij@jlu.edu.cn); [duanhf@jlu.edu.cn](mailto:duanhf@jlu.edu.cn); Tel: 0431-85168398

#### Table of Contents

|                                                                                                                            |                |
|----------------------------------------------------------------------------------------------------------------------------|----------------|
| <b>1. General information</b>                                                                                              | <b>S2</b>      |
| <b>2. Starting materials</b>                                                                                               | <b>S2</b>      |
| <b>3. Carried out with the corresponding quinidine-based catalyst</b>                                                      | <b>S2</b>      |
| <b>4. Reaction of heteroaromatic thiol or aliphatic ketimines</b>                                                          | <b>S2</b>      |
| <b>5. Optimization of the reaction conditions of benzyl thiol</b>                                                          | <b>S3</b>      |
| <b>6. The addition of thiols to other ketimines</b>                                                                        | <b>S4</b>      |
| <b>7. Reaction with Cbz and PMP protecting group ketimines</b>                                                             | <b>S4</b>      |
| <b>8. General Procedure for the Addition of Thiols to Trifluoromethyl ketimines and Characterization of Products 4a-4u</b> | <b>S4-S12</b>  |
| <b>9. NMR spectra of addition products 4a-4u</b>                                                                           | <b>S13-S44</b> |
| <b>10. HPLC traces of compounds 4a-4u</b>                                                                                  | <b>S45-S65</b> |
| <b>11. X-ray Crystallographic Data of compound 4a</b>                                                                      | <b>S66-S67</b> |
| <b>12. References</b>                                                                                                      | <b>S67</b>     |

## 1. General information

Unless otherwise stated, all reagents were purchased from commercial suppliers and used without purification. All solvents were obtained from commercial sources and were purified according to standard procedures. TLC was carried out on silica gel plates (HSGF 254), which were visualized with UV light and/or staining with phosphomolybdic acids solution. Purification of reaction products was carried out by column chromatography using silica gel (200-300 mesh).  $^1\text{H}$ ,  $^{13}\text{C}$  NMR, and  $^{19}\text{F}$  NMR spectra were recorded on a Varian Mercury-300BB (300 MHz), a Bruker NMR Spectrometer (400 MHz). All chemical shifts ( $\delta$ ) were given in ppm. Chemical shifts are relative to the resonance of the deuterated solvent as the internal standard ( $\text{CDCl}_3$ ,  $\delta$ 7.26 ppm for proton NMR,  $\delta$ 77.16 ppm for carbon NMR;  $\text{DMSO-d}_6$ ,  $\delta$ 2.50 ppm for proton NMR,  $\delta$ 39.52 ppm for carbon NMR). Data are presented as follows: chemical shift, integration, multiplicity (br = broad, s = singlet, d = double, t = triplet, q = quartet, m = multiplet), and coupling constant in hertz. Mass spectra were recorded on a Bruker Agilent 1290 MicroTOF-Q II instrument. Melting points were measured on a melting points apparatus and were uncorrected. The enantioselectivity value determination was carried out using chiral HPLC (Waters) instrumentation with a Chiracel AD-H column and IA-3 column. Optical rotations were measured on a Shanghai ShenGuang SGW-2 polarimeter at  $\lambda = 589$  nm. Optical rotations are reported as follows:  $[\alpha]_D^{25}$  (c = g/100mL, solvent).

## 2. Starting Materials.

2,2,2-trifluoroacetophenone were prepared according to literature procedures.<sup>1</sup> All trifluoromethyl ketimines **2** were prepared using reported procedures from corresponding 2,2,2-trifluoroacetophenone.<sup>2</sup> All thiols **3** were purchased from commercial suppliers and used directly. The chiral catalysts **1a-1m** were prepared according to the procedure had been reported.<sup>3</sup>

## 3. Carried out with the corresponding quinidine-based catalyst

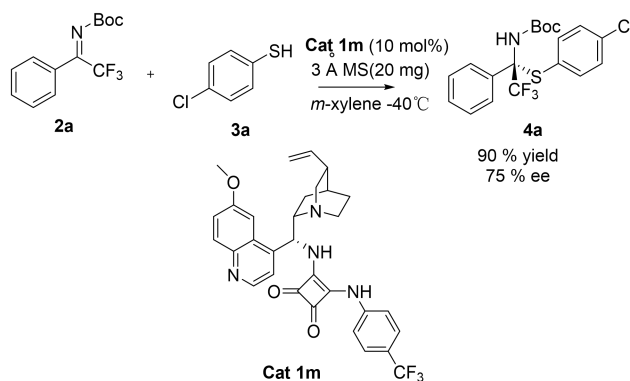

## 4. Reaction of heteroaromatic thiol or aliphatic ketimines

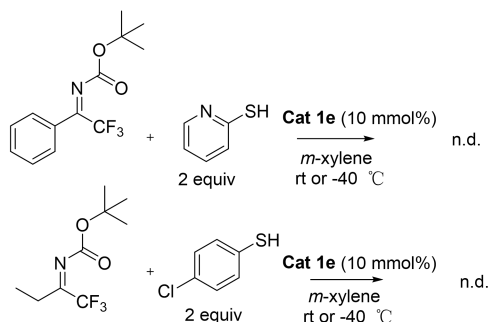

## 5. Optimization of the reaction conditions of benzyl thiol<sup>[a]</sup>

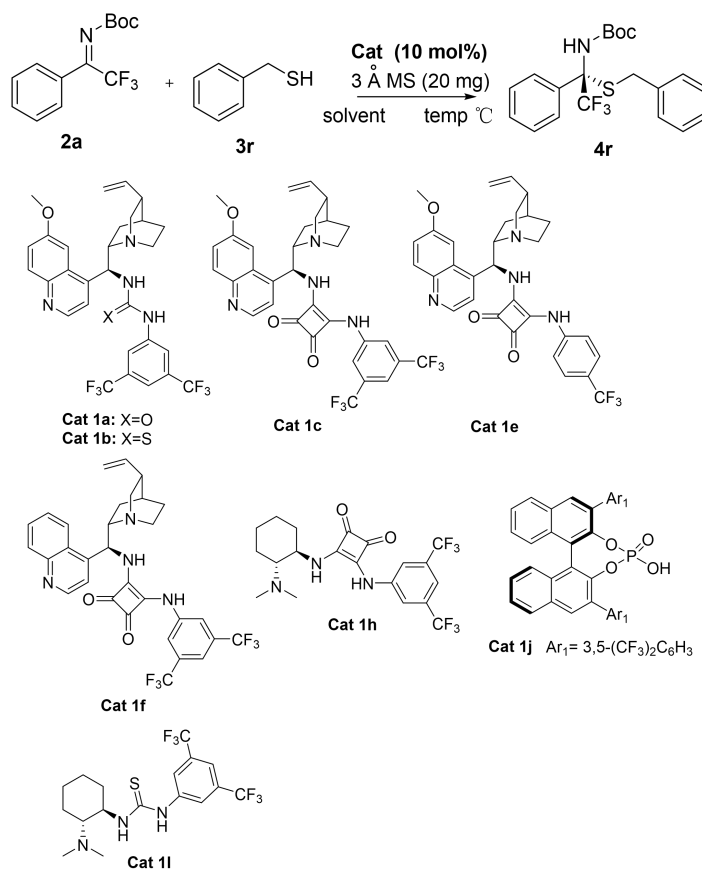

| entry | Cat       | solvent                         | temp | Yield (%) | Ee (%) |
|-------|-----------|---------------------------------|------|-----------|--------|
| 1     | <b>1a</b> | <i>m</i> -xylene                | -40  | 84        | 38     |
| 2     | <b>1b</b> | <i>m</i> -xylene                | -40  | 88        | 43     |
| 3     | <b>1c</b> | <i>m</i> -xylene                | -40  | 86        | 12     |
| 4     | <b>1e</b> | <i>m</i> -xylene                | -40  | 88        | 20     |
| 5     | <b>1f</b> | <i>m</i> -xylene                | -40  | 79        | -      |
| 6     | <b>1j</b> | <i>m</i> -xylene                | -40  | 80        | -      |
| 7     | <b>1h</b> | <i>m</i> -xylene                | -40  | 83        | 48     |
| 8     | <b>1l</b> | <i>m</i> -xylene                | -40  | 85        | 56     |
| 9     | <b>1l</b> | CH <sub>2</sub> Cl <sub>2</sub> | -40  | 84        | 21     |
| 10    | <b>1l</b> | CHCl <sub>3</sub>               | -40  | 83        | 9      |
| 10    | <b>1l</b> | MTBE                            | -40  | 87        | 48     |
| 11    | <b>1l</b> | toluene                         | -40  | 87        | 57     |

<sup>[a]</sup>Unless otherwise noted, reactions were carried out with 0.1 mmol of **2a**, 10 mol% of catalyst and 0.2 mmol of **3r** in 1 ml of solvent. <sup>[b]</sup>Yield of isolated product. <sup>[c]</sup>Determined by HPLC using a chiral stationary phase.

## 6. The addition of thiols to other ketimines

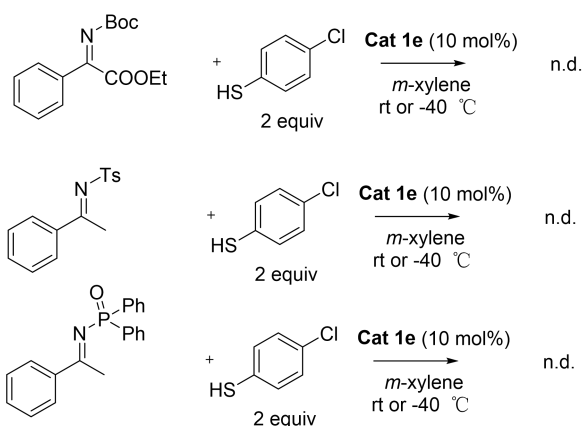

## 7. Reaction with Cbz and PMP protecting group ketimines

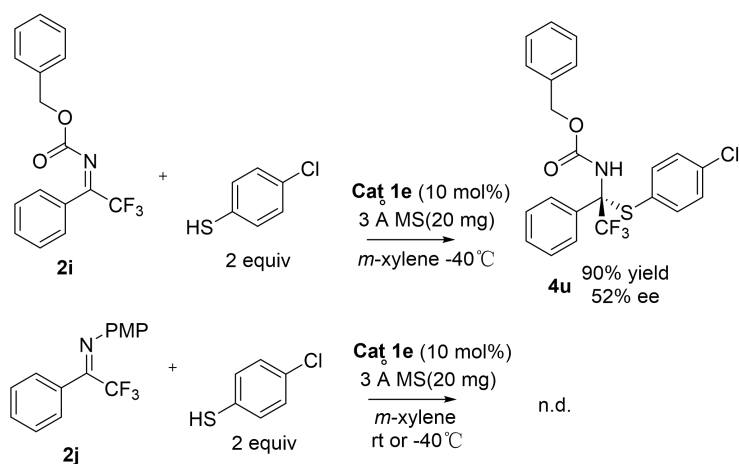

## 8. General Procedure for the Addition of Thiols to Trifluoromethyl ketimines and Characterization of Products 4a-4u.

Ketimines **2** (0.1 mmol) and catalyst **1e** (0.010 mmol, 10 mol %) were dissolved in *m*-xylene (1 ml), and 3 Å MS (20 mg) was added. Until the mixture was cooled to  $-40\text{ }^\circ\text{C}$ , the thiols **3** were added freshly in one portion. The mixture was stirred sharply at  $-40\text{ }^\circ\text{C}$  until the reaction was judged to be completed by TLC. Then the solvent was removed in vacuo via evaporation. The crude product was purified by chromatography (PE/EA).

tert-butyl (S)-1-((4-chlorophenyl)thio)-2,2,2-trifluoro-1-phenylethyl)carbamate (**4a**)

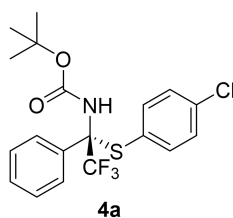

Purified by silica gel column chromatography (PE/EA=20:1), white solid, 40.1 mg, 96% yield, mp =  $125\text{--}127\text{ }^\circ\text{C}$ ,  $[\alpha]_{\text{D}}^{25} = -12.8$  ( $c = 0.1$ ,  $\text{CHCl}_3$ ). The ee value was 94% (Chiralpak AD-H, hexane/*i*-PrOH = 95:5, 254 nm, 1 mL/min,  $t_{\text{major}} = 5.80$  min,  $t_{\text{minor}} = 5.57$  min).

$^1\text{H NMR}$  (400 MHz,  $\text{CDCl}_3$ )  $\delta$  7.64 – 7.57 (m, 2H), 7.54 (d,  $J = 8.4$  Hz, 2H), 7.43 – 7.32 (m, 5H), 5.20 (s, 1H), 1.39 (s, 9H).  $^{13}\text{C NMR}$  (101 MHz,  $\text{CDCl}_3$ )  $\delta$  152.0, 139.7, 136.9, 134.0, 129.1, 129.1, 128.1,

127.5, 127.3, 124.5 (q,  $J = 284.2$  Hz), 81.4, 73.5 (q,  $J = 27.9$  Hz), 28.0.  $^{19}\text{F}$  NMR (377 MHz,  $\text{CDCl}_3$ )  $\delta$  -74.26. HRMS (ESI)  $m/z$ :  $[\text{M} + \text{Na}]^+$  calculated for  $\text{C}_{19}\text{H}_{19}\text{ClF}_3\text{NO}_2\text{S}$  440.0664; found 440.0669.

tert-butyl (S)-(2,2,2-trifluoro-1-phenyl-1-(*o*-tolylthio)ethyl)carbamate (**4b**)

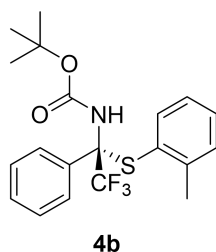

Purified by silica gel column chromatography (PE/EA=20:1), white solid, 37.3 mg, 94% yield, mp =163-164 °C,  $[\alpha]_D^{25} = -20.4$  ( $c=0.1$ ,  $\text{CHCl}_3$ ). The ee value was 64% (Chiralpak AD-H, hexane/*i*-PrOH = 95:5, 254 nm, 1 mL/min,  $t_{\text{major}} = 5.63$  min,  $t_{\text{minor}} = 6.05$  min).

$^1\text{H}$  NMR (400 MHz,  $\text{CDCl}_3$ )  $\delta$  7.72 – 7.65 (m, 2H), 7.49 (d,  $J = 7.6$  Hz, 1H), 7.42 – 7.27 (m, 5H), 7.16 (d,  $J = 8.7$  Hz, 1H), 5.22 (s, 1H), 2.57 (s, 3H), 1.38 (s, 9H).  $^{13}\text{C}$  NMR (101 MHz,  $\text{CDCl}_3$ )  $\delta$  152.2, 145.2, 139.2, 130.8, 130.3, 129.0, 128.7, 128.5, 127.9, 127.7, 126.1, 124.5 (q,  $J = 284.4$  Hz), 81.2, 73.3 (q,  $J = 28.0$  Hz), 28.0, 21.0.  $^{19}\text{F}$  NMR (377 MHz,  $\text{CDCl}_3$ )  $\delta$  -74.55. HRMS (ESI)  $m/z$ :  $[\text{M} + \text{Na}]^+$  calculated for  $\text{C}_{20}\text{H}_{22}\text{F}_3\text{NO}_2\text{S}$  420.1203; found 420.1216.

tert-butyl (S)-(2,2,2-trifluoro-1-((2-fluorophenyl)thio)-1-phenylethyl)carbamate (**4c**)

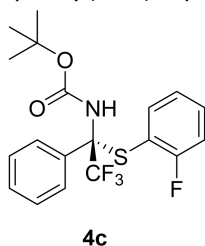

Purified by silica gel column chromatography (PE/EA=20:1), white solid, 37.3 mg, 92% yield, mp = 124-125 °C,  $[\alpha]_D^{25} = -14.8$  ( $c=0.1$ ,  $\text{CHCl}_3$ ). The ee value was 96% (Chiralpak AD-H, hexane/*i*-PrOH = 95:5, 254 nm, 1 mL/min,  $t_{\text{major}} = 6.92$  min,  $t_{\text{minor}} = 8.42$  min).

$^1\text{H}$  NMR (400 MHz,  $\text{CDCl}_3$ )  $\delta$  7.71 – 7.64 (m, 2H), 7.55 (t,  $J = 7.4$  Hz, 1H), 7.50 – 7.36 (m, 4H), 7.19 – 7.12 (m, 2H), 5.29 (s, 1H), 1.41 (s, 9H).  $^{13}\text{C}$  NMR (101 MHz,  $\text{CDCl}_3$ )  $\delta$  164.5 (d,  $J = 250.7$  Hz), 152.1, 140.7, 133.0 (d,  $J = 8.3$  Hz), 131.3, 129.1, 128.1, 127.6, 124.4, 124.2 (q,  $J = 284.4$  Hz), 116.3, 116.1, 81.3, 73.9 (q,  $J = 29.1$  Hz), 28.0.  $^{19}\text{F}$  NMR (377 MHz,  $\text{CDCl}_3$ )  $\delta$  -74.57, -103.26. HRMS (ESI)  $m/z$ :  $[\text{M} + \text{Na}]^+$  calculated for  $\text{C}_{19}\text{H}_{19}\text{F}_4\text{NO}_2\text{S}$  424.0960; found 424.0965.

tert-butyl (S)-(2,2,2-trifluoro-1-phenyl-1-(*m*-tolylthio)ethyl)carbamate (**4d**)

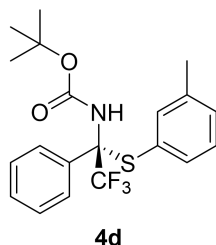

Purified by silica gel column chromatography (PE/EA=20:1), white solid, 36.1mg, 91% yield, mp =128-129 °C,  $[\alpha]_D^{25} = -5.16$  ( $c=0.1$ ,  $\text{CHCl}_3$ ). The ee value was 99% (Chiralpak AD-H, hexane/*i*-PrOH = 95:5, 254 nm, 1 mL/min,  $t_{\text{major}} = 5.91$  min,  $t_{\text{minor}} = 6.80$  min).

**<sup>1</sup>H NMR** (400 MHz, CDCl<sub>3</sub>) δ 7.69 – 7.61 (m, 2H), 7.48 – 7.37 (m, 5H), 7.27 (d, *J* = 1.1 Hz, 1H), 5.21 (s, 1H), 2.37 (s, 3H), 1.41 (s, 9H). **<sup>13</sup>C NMR** (101 MHz, CDCl<sub>3</sub>) δ 152.2, 139.0, 138.6, 135.5, 131.0, 128.9, 128.6, 128.4, 128.0, 127.6, 124.6 (q, *J* = 284.1 Hz), 120.3, 81.1, 73.2 (q, *J* = 28.3 Hz), 28.1, 21.2. **<sup>19</sup>F NMR** (377 MHz, CDCl<sub>3</sub>) δ -74.04. **HRMS** (ESI) *m/z*: [M + Na]<sup>+</sup> calculated for C<sub>20</sub>H<sub>22</sub>F<sub>3</sub>NO<sub>2</sub>S 420.1206; found 420.1216.

tert-butyl (S)-1-((3-bromophenyl)thio)-2,2,2-trifluoro-1-phenylethylcarbamate (**4e**)

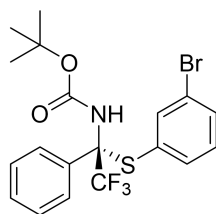

**4e**

Purified by silica gel column chromatography (PE/EA=20:1), white solid, 42.1 mg, 91% yield, mp =150-151 °C, [α]<sub>D</sub><sup>25</sup> =-35.2 (c =0.1, CHCl<sub>3</sub>). The ee value was 81% (Chiralpak IA-3, hexane/ethyl alcohol= 95:5, 254 nm, 1 mL/min, *t*<sub>major</sub> =4.71 min, *t*<sub>minor</sub> =4.45 min).

**<sup>1</sup>H NMR** (400 MHz, CDCl<sub>3</sub>) δ 7.78 (s, 1H), 7.63 (td, *J* = 8.8, 7.9, 2.9 Hz, 4H), 7.43 (dd, *J* = 5.1, 2.0 Hz, 3H), 7.29 (d, *J* = 6.9 Hz, 1H), 5.28 (s, 1H), 1.46 (s, 9H). **<sup>13</sup>C NMR** (101 MHz, CDCl<sub>3</sub>) δ 152.0, 140.7, 137.0, 133.3, 130.9, 130.1, 129.2, 128.6, 128.1, 127.4, 124.4 (q, *J* = 284.2 Hz), 122.3, 81.6, 73.7 (q, *J* = 28.7 Hz), 28.1. **<sup>19</sup>F NMR** (377 MHz, CDCl<sub>3</sub>) δ -74.15. **HRMS** (ESI) *m/z*: [M + Na]<sup>+</sup> calculated for C<sub>19</sub>H<sub>19</sub>BrF<sub>3</sub>NO<sub>2</sub>S 484.0175; found 484.0164.

tert-butyl (S)-2,2,2-trifluoro-1-((4-fluorophenyl)thio)-1-phenylethylcarbamate (**4f**)

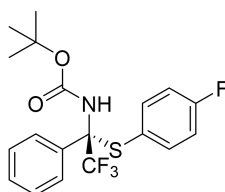

**4f**

Purified by silica gel column chromatography (PE/EA=20:1), white solid, 36.5 mg, 91% yield, mp =157-158 °C, [α]<sub>D</sub><sup>25</sup> =-28 (c =0.1, CHCl<sub>3</sub>). The ee value was 83% (Chiralpak AD-H, hexane/*i*-PrOH = 95:5, 254 nm, 1 mL/min, *t*<sub>major</sub> =5.93 min, *t*<sub>minor</sub> =5.53 min).

**<sup>1</sup>H NMR** (400 MHz, CDCl<sub>3</sub>) δ 7.67 – 7.49 (m, 4H), 7.34 (d, *J* = 8.5 Hz, 2H), 7.08 (t, *J* = 8.7 Hz, 2H), 5.20 (s, 1H), 1.40 (s, 9H). **<sup>13</sup>C NMR** (101 MHz, CDCl<sub>3</sub>) δ 163.1 (d, *J* = 249.3 Hz), 152.1, 139.7, 137.1, 129.4 (d, *J* = 8.3 Hz), 129.2, 127.0, 124.3 (q, *J* = 284.1 Hz), 120.1, 115.2 (d, *J* = 21.8 Hz), 81.6, 73.0 (q, *J* = 28.2 Hz), 28.1. **<sup>19</sup>F NMR** (377 MHz, CDCl<sub>3</sub>) δ -74.25, -109.82. **HRMS** (ESI) *m/z*: [M + Na]<sup>+</sup> calculated for C<sub>19</sub>H<sub>19</sub>F<sub>4</sub>NO<sub>2</sub>S 424.0954; found 424.0965

tert-butyl (S)-1-((4-bromophenyl)thio)-2,2,2-trifluoro-1-phenylethylcarbamate (**4g**)

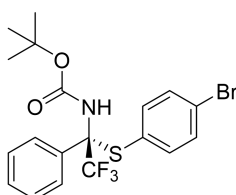

**4g**

Purified by silica gel column chromatography (PE/EA=20:1), white solid, 43.0 mg, 93% yield, mp

=112-113 °C,  $[\alpha]_D^{25} = -13.6$  ( $c = 0.1$ ,  $\text{CHCl}_3$ ). The ee value was 99% (Chiralpak IA-3, hexane/ethyl alcohol = 95:5, 214 nm, 1 mL/min,  $t_{\text{major}} = 4.50$  min,  $t_{\text{minor}} = 5.12$  min).

**$^1\text{H NMR}$**  (400 MHz,  $\text{CDCl}_3$ )  $\delta$  7.63 – 7.58 (m, 2H), 7.52 – 7.36 (m, 8H), 5.19 (s, 1H), 1.39 (s, 9H).  **$^{13}\text{C NMR}$**  (101 MHz,  $\text{CDCl}_3$ )  $\delta$  152.0, 139.9, 138.5, 134.0, 132.1, 129.1, 128.1, 127.9, 127.4, 125.3, 124.5 (q,  $J = 283.9$  Hz), 81.4, 73.5 (q,  $J = 29.2$  Hz), 28.0.  **$^{19}\text{F NMR}$**  (377 MHz,  $\text{CDCl}_3$ )  $\delta$  -74.27. **HRMS** (ESI)  $m/z$ :  $[\text{M} + \text{Na}]^+$  calculated for  $\text{C}_{19}\text{H}_{19}\text{BrF}_3\text{NO}_2\text{S}$  484.0166; found 484.0164.

tert-butyl (S)-(2,2,2-trifluoro-1-phenyl-1-(p-tolylthio)ethyl)carbamate (**4h**)

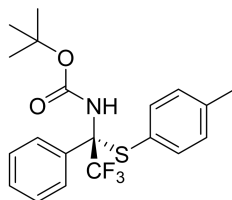

**4h**

Purified by silica gel column chromatography (PE/EA=20:1), white solid, 38.1 mg, 96% yield, mp = 104-105 °C,  $[\alpha]_D^{25} = -12$  ( $c = 0.1$ ,  $\text{CHCl}_3$ ). The ee value was 62% (Chiralpak AD-H, hexane/*i*-PrOH = 95:5, 254 nm, 1 mL/min,  $t_{\text{major}} = 5.68$  min,  $t_{\text{minor}} = 6.46$  min).

**$^1\text{H NMR}$**  (400 MHz,  $\text{CDCl}_3$ )  $\delta$  7.63 (d,  $J = 8.0$  Hz, 2H), 7.49 (d,  $J = 7.9$  Hz, 2H), 7.38 (dd,  $J = 5.2, 2.1$  Hz, 3H), 7.17 (d,  $J = 7.9$  Hz, 2H), 5.15 (s, 1H), 2.39 (s, 3H), 1.39 (s, 9H).  **$^{13}\text{C NMR}$**  (101 MHz,  $\text{CDCl}_3$ )  $\delta$  153.3, 140.6, 138.4, 135.4, 129.7, 128.9, 128.0, 127.5, 125.2, 124.6 (q,  $J = 284.3$  Hz), 81.1, 73.1 (q,  $J = 27.6$  Hz), 28.0, 21.4.  **$^{19}\text{F NMR}$**  (377 MHz,  $\text{CDCl}_3$ )  $\delta$  -74.18. **HRMS** (ESI)  $m/z$ :  $[\text{M} + \text{Na}]^+$  calculated for  $\text{C}_{20}\text{H}_{22}\text{F}_3\text{NO}_2\text{S}$  420.1209; found 420.1216.

tert-butyl (S)-(2,2,2-trifluoro-1-(naphthalen-2-ylthio)-1-phenylethyl)carbamate (**4i**)

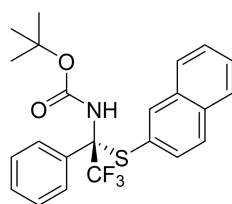

**4i**

Purified by silica gel column chromatography (PE/EA=20:1), white solid, 40.2 mg, 93% yield, mp = 165-166 °C,  $[\alpha]_D^{25} = -14.2$  ( $c = 0.1$ ,  $\text{CHCl}_3$ ). The ee value was 93% (Chiralpak AD-H, hexane/*i*-PrOH = 95:5, 254 nm, 1 mL/min,  $t_{\text{major}} = 10.63$  min,  $t_{\text{minor}} = 8.49$  min).

**$^1\text{H NMR}$**  (400 MHz,  $\text{CDCl}_3$ )  $\delta$  8.15 (s, 1H), 7.85 (dd,  $J = 20.4, 8.1$  Hz, 3H), 7.66 (t,  $J = 7.3$  Hz, 3H), 7.55 (dd,  $J = 6.8, 1.3$  Hz, 2H), 7.44 – 7.37 (m, 3H), 5.20 (s, 1H), 1.38 (s, 9H).  **$^{13}\text{C NMR}$**  (101 MHz,  $\text{CDCl}_3$ )  $\delta$  152.2, 139.2, 136.0, 134.2, 133.8, 133.3, 129.0, 128.8, 128.3, 128.2, 128.1, 127.7, 127.6, 126.6, 126.0, 121.8 (q,  $J = 283.5$  Hz), 81.2, 73.5 (q,  $J = 27.9$  Hz), 28.1. **HRMS** (ESI)  $m/z$ :  $[\text{M} + \text{Na}]^+$  calculated for  $\text{C}_{23}\text{H}_{22}\text{F}_3\text{NO}_2\text{S}$  456.1225; found 456.1216.

tert-butyl (S)-(1-((4-chlorophenyl)thio)-2,2,2-trifluoro-1-(4-fluorophenyl)ethyl)carbamate (**4j**)

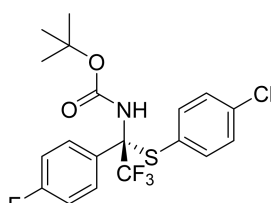

**4j**

Purified by silica gel column chromatography (PE/EA=20:1), white solid, 40.8 mg, 94% yield, mp

=136-137 °C,  $[\alpha]_D^{25} = -13.4$  ( $c = 0.1$ ,  $\text{CHCl}_3$ ). The ee value was 72% (Chiralpak AD-H, hexane/*i*-PrOH = 95:5, 254 nm, 1 mL/min,  $t_{\text{major}} = 5.35$  min,  $t_{\text{minor}} = 4.64$  min).

**$^1\text{H NMR}$**  (400 MHz,  $\text{CDCl}_3$ )  $\delta$  7.67 – 7.49 (m, 4H), 7.34 (d,  $J = 8.5$  Hz, 2H), 7.08 (t,  $J = 8.7$  Hz, 2H), 5.20 (s, 1H), 1.40 (s, 9H).  **$^{13}\text{C NMR}$**  (101 MHz,  $\text{CDCl}_3$ )  $\delta$  164.2 (d,  $J = 251.5$  Hz), 140.6 (d,  $J = 8.8$  Hz), 133.8, 130.7, 129.1, 128.1, 127.5, 124.6 (q,  $J = 284.3$  Hz), 124.2, 116.0 (d,  $J = 21.8$  Hz), 81.3, 73.3 (q,  $J = 25.5$  Hz), 28.0.  **$^{19}\text{F NMR}$**  (377 MHz,  $\text{CDCl}_3$ )  $\delta$  -74.28, -109.82. **HRMS (ESI)**  $m/z$ :  $[\text{M} + \text{Na}]^+$  calculated for  $\text{C}_{19}\text{H}_{18}\text{ClF}_4\text{NO}_2\text{S}$  458.0578; found 458.0575.

tert-butyl (S)-1-(4-bromophenyl)-1-((4-chlorophenyl)thio)-2,2,2-trifluoroethylcarbamate (**4k**)

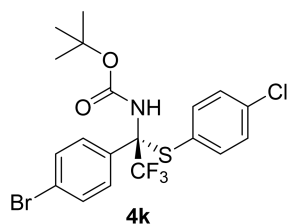

Purified by silica gel column chromatography (PE/EA=20:1), white solid, 45.6 mg, 92% yield, mp =170-171 °C,  $[\alpha]_D^{25} = -10.6$  ( $c = 0.1$ ,  $\text{CHCl}_3$ ). The ee value was 86% (Chiralpak IA-3, hexane/ethyl alcohol = 95:5, 254 nm, 1 mL/min,  $t_{\text{major}} = 4.50$  min,  $t_{\text{minor}} = 4.28$  min).

**$^1\text{H NMR}$**  (400 MHz,  $\text{CDCl}_3$ )  $\delta$  7.56 – 7.45 (m, 6H), 7.34 (d,  $J = 8.5$  Hz, 2H), 5.17 (s, 1H), 1.40 (s, 9H).  **$^{13}\text{C NMR}$**  (101 MHz,  $\text{CDCl}_3$ )  $\delta$  152.0, 142.3, 139.7, 137.2, 133.1, 131.3, 129.2, 126.8, 124.2 (q,  $J = 284.1$  Hz), 123.7, 81.7, 73.1 (q,  $J = 28.8$  Hz), 28.1.  **$^{19}\text{F NMR}$**  (377 MHz,  $\text{CDCl}_3$ )  $\delta$  -74.42. **HRMS (ESI)**  $m/z$ :  $[\text{M} + \text{Na}]^+$  calcd for  $\text{C}_{19}\text{H}_{18}\text{BrClF}_3\text{NO}_2\text{S}$  517.9780; found 517.9774.

tert-butyl (S)-1-((4-chlorophenyl)thio)-2,2,2-trifluoro-1-(p-tolyl)ethylcarbamate (**4l**)

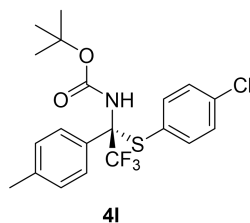

Purified by silica gel column chromatography (PE/EA=20:1), white solid, 41.3 mg, 96% yield, mp =175-176 °C,  $[\alpha]_D^{25} = -8.4$  ( $c = 0.1$ ,  $\text{CHCl}_3$ ). The ee value was 66% (Chiralpak AD-H, hexane/*i*-PrOH = 95:5, 254 nm, 1 mL/min,  $t_{\text{major}} = 5.26$  min,  $t_{\text{minor}} = 4.53$  min).

**$^1\text{H NMR}$**  (400 MHz,  $\text{CDCl}_3$ )  $\delta$  7.52 (dd,  $J = 8.5, 4.6$  Hz, 4H), 7.33 (d,  $J = 8.5$  Hz, 2H), 6.90 (d,  $J = 9.0$  Hz, 2H), 5.15 (s, 1H), 3.82 (s, 3H), 1.40 (s, 9H).  **$^{13}\text{C NMR}$**  (101 MHz,  $\text{CDCl}_3$ )  $\delta$  152.0, 139.7, 139.1, 136.8, 131.0, 129.0, 128.9, 127.4, 127.3, 124.5 (q,  $J = 284.0$  Hz), 81.3, 73.4 (q,  $J = 28.5$  Hz), 28.1, 21.1.  **$^{19}\text{F NMR}$**  (377 MHz,  $\text{CDCl}_3$ )  $\delta$  -74.49. **HRMS (ESI)**  $m/z$ :  $[\text{M} + \text{Na}]^+$  calculated for  $\text{C}_{20}\text{H}_{21}\text{ClF}_3\text{NO}_2\text{S}$  454.0820; found 454.0826.

tert-butyl (S)-1-((4-chlorophenyl)thio)-2,2,2-trifluoro-1-(4-methoxyphenyl)ethylcarbamate (**4m**)

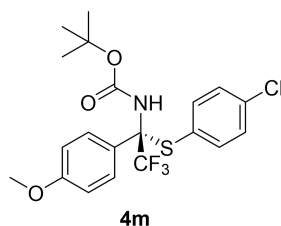

Purified by silica gel column chromatography (PE/EA=20:1), white solid, 42.5 mg, 95% yield, mp



=146-147 °C,  $[\alpha]_D^{25} = -10.8$  ( $c = 0.1$ ,  $\text{CHCl}_3$ ). The ee value was 99% (Chiralpak AD-H, hexane/*i*-PrOH = 95:5, 254nm, 1 mL/min,  $t_{\text{major}} = 6.80$  min,  $t_{\text{minor}} = 6.19$  min).

**$^1\text{H NMR}$**  (400 MHz,  $\text{CDCl}_3$ )  $\delta$  7.52 (dd,  $J = 19.8, 8.3$  Hz, 4H), 7.34 (d,  $J = 8.5$  Hz, 2H), 7.20 (d,  $J = 8.3$  Hz, 2H), 5.19 (s, 1H), 2.37 (s, 3H), 1.41 (s, 9H).  **$^{13}\text{C NMR}$**  (101 MHz,  $\text{CDCl}_3$ )  $\delta$  160.1, 139.6, 136.8, 132.6, 129.1, 128.7, 127.4, 124.49 (q,  $J = 284.0$  Hz), 118.2, 113.5, 81.3, 73.6 (q,  $J = 24.3$  Hz), 55.3, 28.1.  **$^{19}\text{F NMR}$**  (377 MHz,  $\text{CDCl}_3$ )  $\delta$  -74.43. **HRMS** (ESI)  $m/z$ :  $[\text{M} + \text{Na}]^+$  calculated for  $\text{C}_{20}\text{H}_{21}\text{ClF}_3\text{NO}_3\text{S}$  470.0782; found 470.0775.

tert-butyl (S)-1-(2-bromophenyl)-1-((4-chlorophenyl)thio)-2,2,2-trifluoroethylcarbamate (**4n**)

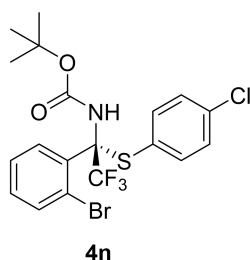

Purified by silica gel column chromatography (PE/EA=20:1), white solid, 47.6 mg, 96% yield, mp =121-123 °C,  $[\alpha]_D^{25} = -8.6$  ( $c = 0.1$ ,  $\text{CHCl}_3$ ). The ee value was 99% (Chiralpak AD-H, hexane/*i*-PrOH = 95:5, 254nm, 1mL/min,  $t_{\text{major}} = 11.04$  min,  $t_{\text{minor}} = 7.28$  min).

**$^1\text{H NMR}$**  (400 MHz,  $\text{CDCl}_3$ )  $\delta$  7.59 (s, 1H), 7.51 (t,  $J = 8.4$  Hz, 3H), 7.39 – 7.30 (m, 4H), 5.20 (s, 1H), 1.40 (s, 9H).  **$^{13}\text{C NMR}$**  (101 MHz,  $\text{CDCl}_3$ )  $\delta$  151.8, 142.7, 139.7, 137.3, 136.1, 133.0, 132.1, 130.5, 130.1, 129.1, 127.2, 125.0 (q,  $J = 285.7$  Hz), 81.2, 73.6 (q,  $J = 23.8$  Hz), 28.1.  **$^{19}\text{F NMR}$**  (377 MHz,  $\text{CDCl}_3$ )  $\delta$  -71.69. **HRMS** (ESI)  $m/z$ :  $[\text{M} + \text{Na}]^+$  calculated for  $\text{C}_{19}\text{H}_{18}\text{BrClF}_3\text{NO}_2\text{S}$  517.9761; found 517.9774.

tert-butyl (S)-1-((4-chlorophenyl)thio)-2,2,2-trifluoro-1-(naphthalen-2-yl)ethylcarbamate (**4o**)

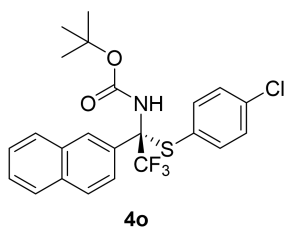

Purified by silica gel column chromatography (PE/EA=20:1), white solid, 43.0 mg, 92% yield, mp =160-161 °C,  $[\alpha]_D^{25} = -15.4$  ( $c = 0.1$ ,  $\text{CHCl}_3$ ). The ee value was 84% (Chiralpak AD-H, hexane/*i*-PrOH = 95:5, 254nm, 1mL/min,  $t_{\text{major}} = 7.83$  min,  $t_{\text{minor}} = 6.06$  min).

**$^1\text{H NMR}$**  (400 MHz,  $\text{CDCl}_3$ )  $\delta$  8.13 (s, 1H), 7.92 – 7.81 (m, 3H), 7.68 (d,  $J = 8.7$  Hz, 1H), 7.61 – 7.48 (m, 4H), 7.39 – 7.32 (m, 2H), 5.29 (s, 1H), 1.39 (s, 9H).  **$^{13}\text{C NMR}$**  (101 MHz,  $\text{CDCl}_3$ )  $\delta$  152.2, 139.2, 136.0, 134.2, 133.8, 133.3, 129.0, 128.8, 128.3, 128.2, 128.1, 127.7, 127.6, 126.6, 126.0, 124.6 (q,  $J = 285.0$  Hz), 81.2, 73.5 (q,  $J = 27.9$  Hz), 28.1.  **$^{19}\text{F NMR}$**  (377 MHz,  $\text{CDCl}_3$ )  $\delta$  -74.06. **HRMS** (ESI)  $m/z$ :  $[\text{M} + \text{Na}]^+$  calculated for  $\text{C}_{23}\text{H}_{21}\text{ClF}_3\text{NO}_2\text{S}$  490.0841; found 490.0826.

tert-butyl (S)-1-((4-chlorophenyl)thio)-2,2,2-trifluoro-1-(3-fluorophenyl)ethylcarbamate (**4p**)

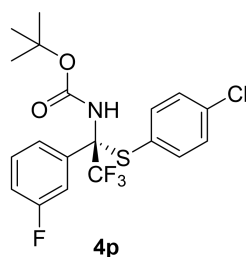

Purified by silica gel column chromatography (PE/EA=20:1), white solid, 40.1 mg, 94% yield, mp = 123-124 °C,  $[\alpha]_D^{25} = -5.6$  ( $c = 0.1$ , CHCl<sub>3</sub>). The ee value was 67% (ChiralpakAD-H, hexane/*i*-PrOH= 98:2, 254nm, 0.8 mL/min,  $t_{\text{major}} = 12.71$  min,  $t_{\text{minor}} = 11.56$  min).

**<sup>1</sup>H NMR** (400 MHz, CDCl<sub>3</sub>) δ 7.53 (d,  $J = 8.3$  Hz, 2H), 7.44 – 7.30 (m, 5H), 7.09 (dd,  $J = 8.1, 2.3, 1.1$  Hz, 1H), 5.22 (s, 1H), 1.40 (s, 9H). **<sup>13</sup>C NMR** (101 MHz, CDCl<sub>3</sub>) δ 162.4 (d,  $J = 245.9$  Hz), 152.0, 139.7, 137.2, 136.5, 135.4, 129.6 (d,  $J = 8.1$  Hz), 129.2, 125.0 (d,  $J = 362.7$  Hz), 124.3 (q,  $J = 284.2$  Hz), 116.2 (d,  $J = 21.1$  Hz), 115.1 (d,  $J = 24.6$  Hz), 81.7, 73.0 (q,  $J = 27.1$  Hz), 28.0. **<sup>19</sup>F NMR** (377 MHz, CDCl<sub>3</sub>) δ -74.19, -112.68. **HRMS** (ESI)  $m/z$ :  $[M + Na]^+$  calculated for C<sub>19</sub>H<sub>18</sub>ClF<sub>4</sub>NO<sub>2</sub>S 458.0580; found 458.0575.

tert-butyl (S)-2-(2,2,2-trifluoro-1-(phenylthio)ethyl)carbamate (**4q**)

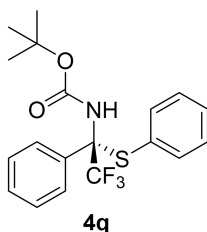

Purified by silica gel column chromatography (PE/EA=20:1), white solid, 36.4 mg, 95% yield, mp = 132-133 °C,  $[\alpha]_D^{25} = -8.2$  ( $c = 0.1$ , CHCl<sub>3</sub>). The ee value was 80% (ChiralpakAD-H, hexane/*i*-PrOH= 95:5, 254 nm, 1 mL/min,  $t_{\text{major}} = 6.42$  min,  $t_{\text{minor}} = 7.28$  min).

**<sup>1</sup>H NMR** (400 MHz, CDCl<sub>3</sub>) δ 7.64 (t,  $J = 6.5$  Hz, 4H), 7.49 – 7.34 (m, 6H), 5.19 (s, 1H), 1.40 (s, 9H). **<sup>13</sup>C NMR** (101 MHz, CDCl<sub>3</sub>) δ 152.2, 138.5, 130.2, 129.0, 128.9, 128.8, 128.0, 127.5, 124.6 (q,  $J = 284.2$  Hz), 120.3, 81.2, 73.3 (q,  $J = 28.3$  Hz), 28.1. **<sup>19</sup>F NMR** (377 MHz, CDCl<sub>3</sub>) δ -74.21. **HRMS** (ESI)  $m/z$ :  $[M + Na]^+$  calculated for C<sub>19</sub>H<sub>20</sub>F<sub>3</sub>NO<sub>2</sub>S 406.1055; found 406.1059.

tert-butyl (S)-2-(1-(benzylthio)-2,2,2-trifluoro-1-phenylethyl)carbamate (**4r**)

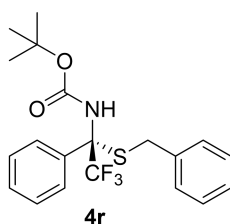

Purified by silica gel column chromatography (PE/EA=20:1), white solid, 35 mg, 88% yield, mp = 134-135 °C,  $[\alpha]_D^{25} = -9.2$  ( $c = 0.1$ , CHCl<sub>3</sub>). The ee value was 20% (ChiralpakAD-H, hexane/ethyl alcohol= 95:5, 254 nm, 1 mL/min,  $t_{\text{major}} = 6.19$  min,  $t_{\text{minor}} = 7.11$  min).

**<sup>1</sup>H NMR** (400 MHz, CDCl<sub>3</sub>) δ 7.67 – 7.52 (m, 2H), 7.40 – 7.21 (m, 8H), 5.61 (s, 1H), 3.97 (d,  $J = 11.3$  Hz, 1H), 3.86 (d,  $J = 11.3$  Hz, 1H), 1.38 (s, 9H). **<sup>13</sup>C NMR** (101 MHz, CDCl<sub>3</sub>) δ 152.3, 135.7, 129.4, 129.0, 128.7, 128.1, 127.5, 127.3, 125.2 (q,  $J = 284.2$  Hz), 120.9, 81.4, 71.6 (q,  $J = 29.0$  Hz), 35.3, 28.0. **<sup>19</sup>F NMR** (377 MHz, CDCl<sub>3</sub>) δ -74.43. **HRMS** (ESI)  $m/z$ :  $[M + Na]^+$  calculated for C<sub>20</sub>H<sub>22</sub>F<sub>3</sub>NO<sub>2</sub>S

420.1229; found 420.1216.

tert-butyl (S)-1-((4-bromophenyl)thio)-2,2,2-trifluoro-1-(4-methoxyphenyl)ethyl)carbamate (**4s**)

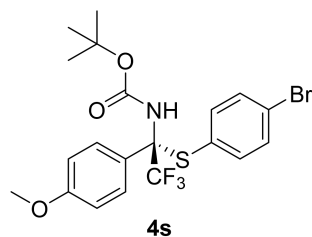

Purified by silica gel column chromatography (PE/EA=20:1), white solid, 46.2 mg, 94% yield, mp = 116-117 °C,  $[\alpha]_D^{25} = -6.2$  ( $c = 0.1$ , CHCl<sub>3</sub>). The ee value was 92% (ChiralpakAD-H, hexane/ethyl alcohol = 95:5, 254nm, 1mL/min,  $t_{major} = 7.23$ min,  $t_{minor} = 5.77$  min).

**<sup>1</sup>H NMR** (400 MHz, CDCl<sub>3</sub>)  $\delta$  7.48 (p,  $J = 9.1, 8.6$  Hz, 6H), 6.94 – 6.86 (m, 2H), 5.17 (s, 1H), 3.82 (s, 3H), 1.40 (s, 9H). **<sup>13</sup>C NMR** (101 MHz, CDCl<sub>3</sub>)  $\delta$  160.1, 152.0, 146.0, 139.8, 132.0, 128.8, 128.1, 125.2, 124.5 (q,  $J = 284.1$  Hz), 113.5, 81.3, 73.3 (q,  $J = 28.8$  Hz), 55.3, 28.1 **<sup>19</sup>F NMR** (377 MHz, CDCl<sub>3</sub>)  $\delta$  -74.44. **HRMS** (ESI)  $m/z$ :  $[M + Na]^+$  calculated for C<sub>20</sub>H<sub>21</sub>BrF<sub>3</sub>NO<sub>3</sub>S 514.0283; found 514.0270.

tert-butyl (S)-1-(2-bromophenyl)-2,2,2-trifluoro-1-(m-tolylthio)ethyl)carbamate (**4t**)

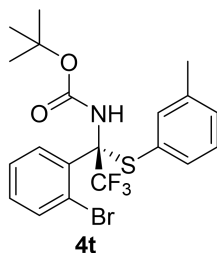

Purified by silica gel column chromatography (PE/EA=20:1), white solid, 45.7 mg, 96% yield, mp = 89-92 °C,  $[\alpha]_D^{25} = -10.6$  ( $c = 0.1$ , CHCl<sub>3</sub>). The ee value was 99% (ChiralpakAD-H, hexane/*i*-PrOH = 95:5, 254nm, 1mL/min,  $t_{major} = 7.57$ min,  $t_{minor} = 6.45$  min).

**<sup>1</sup>H NMR** (400 MHz, CDCl<sub>3</sub>)  $\delta$  7.67 (d,  $J = 7.8$  Hz, 2H), 7.49 – 7.27 (m, 3H), 7.25 – 7.11 (m, 3H), 5.15 (s, 1H), 2.34 (s, 3H), 1.41 (s, 9H). **<sup>13</sup>C NMR** (101 MHz, CDCl<sub>3</sub>)  $\delta$  151.9, 139.0, 136.0, 135.6, 131.4, 130.4, 129.9, 129.3, 128.7, 128.1, 127.1, 125.1 (q,  $J = 285.6$  Hz), 122.4, 120.8, 80.9, 72.4 (q,  $J = 20.1$  Hz), 28.1, 21.2. **<sup>19</sup>F NMR** (377 MHz, CDCl<sub>3</sub>)  $\delta$  -71.15. **HRMS** (ESI)  $m/z$ :  $[M + Na]^+$  calculated for C<sub>20</sub>H<sub>21</sub>BrF<sub>3</sub>NO<sub>2</sub>S 498.0343; found 498.0321.

benzyl (S)-1-((4-chlorophenyl)thio)-2,2,2-trifluoro-1-phenylethyl)carbamate (**4u**)

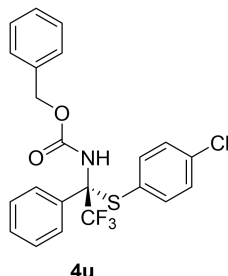

Purified by silica gel column chromatography (PE/EA=20:1), white solid, 40.7 mg, 90% yield, mp = 70-72 °C,  $[\alpha]_D^{25} = -12.8$  ( $c = 0.1$ , CHCl<sub>3</sub>). The ee value was 52% (Chiralpak AD-H, hexane/*i*-PrOH = 95:5, 254 nm, 1 mL/min,  $t_{major} = 12.29$  min,  $t_{minor} = 8.77$  min).

**<sup>1</sup>H NMR** (400 MHz, CDCl<sub>3</sub>)  $\delta$  7.62 (dd,  $J = 6.4, 2.5$  Hz, 2H), 7.48 – 7.29 (m, 10H), 7.09 (d,  $J = 7.8$  Hz,

2H), 5.40 (s, 1H), 5.23 (d,  $J = 11.8$  Hz, 1H), 4.95 (d,  $J = 12.0$  Hz, 1H).  **$^{13}\text{C}$  NMR** (101 MHz,  $\text{CDCl}_3$ )  $\delta$ 152.9, 139.6, 137.0, 135.5, 133.4, 129.4, 129.1, 128.7, 128.3, 127.5, 126.8, 124.3 (q,  $J = 284.1$  Hz), 73.5 (q,  $J = 28.5$  Hz), 67.6.  **$^{19}\text{F}$  NMR** (377 MHz,  $\text{CDCl}_3$ )  $\delta$ -74.22. **HRMS** (ESI)  $m/z$ :  $[\text{M} + \text{Na}]^+$  calculated for  $\text{C}_{22}\text{H}_{17}\text{ClF}_3\text{NO}_2\text{S}$  474.1480; found 474.1452.

## 9. NMR spectra of addition products 4a-4u.

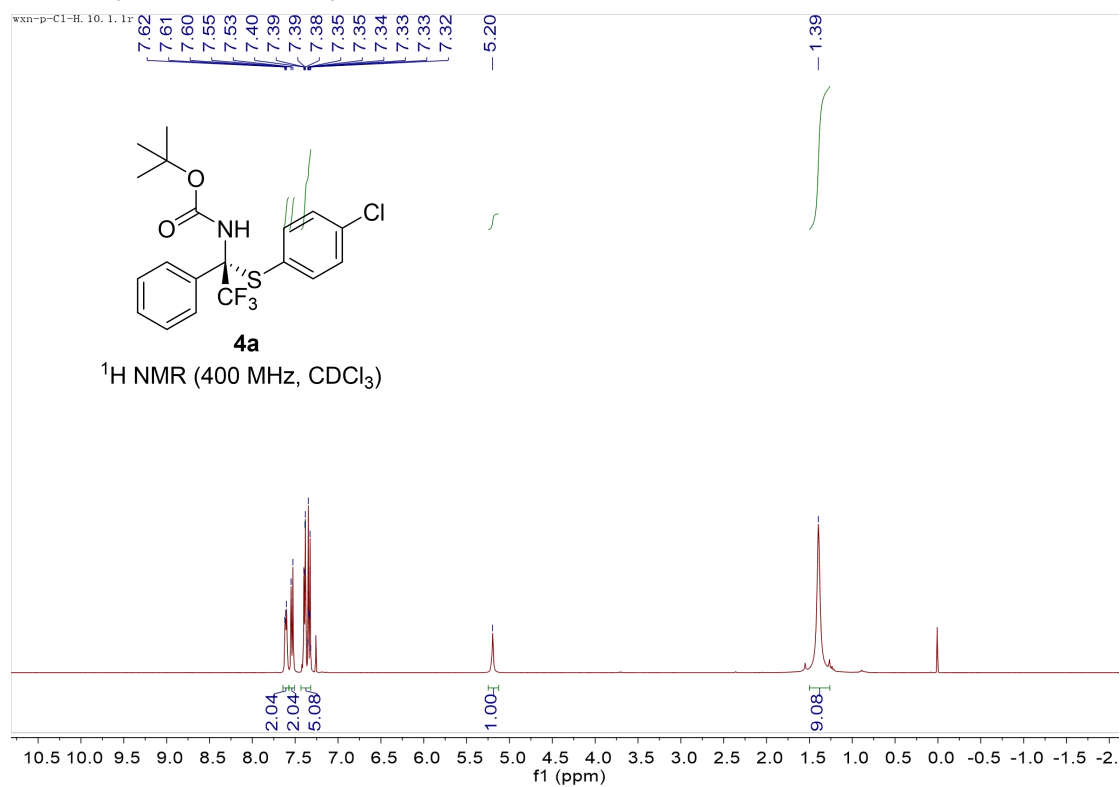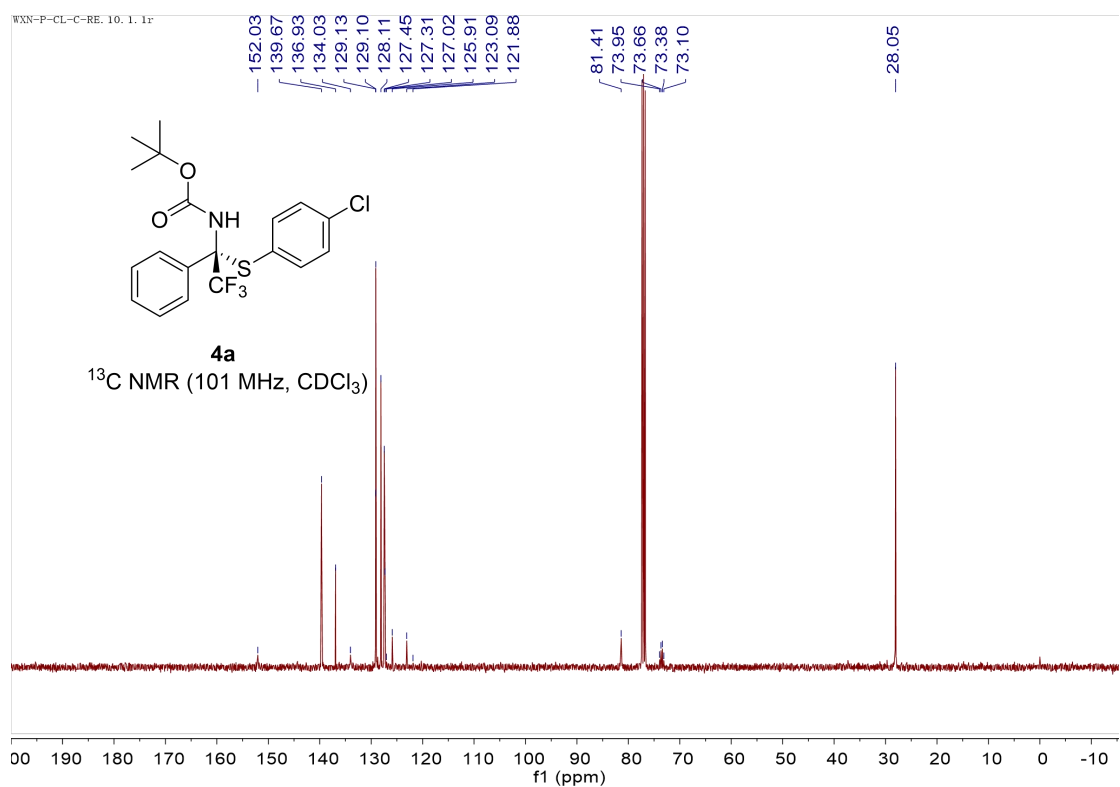

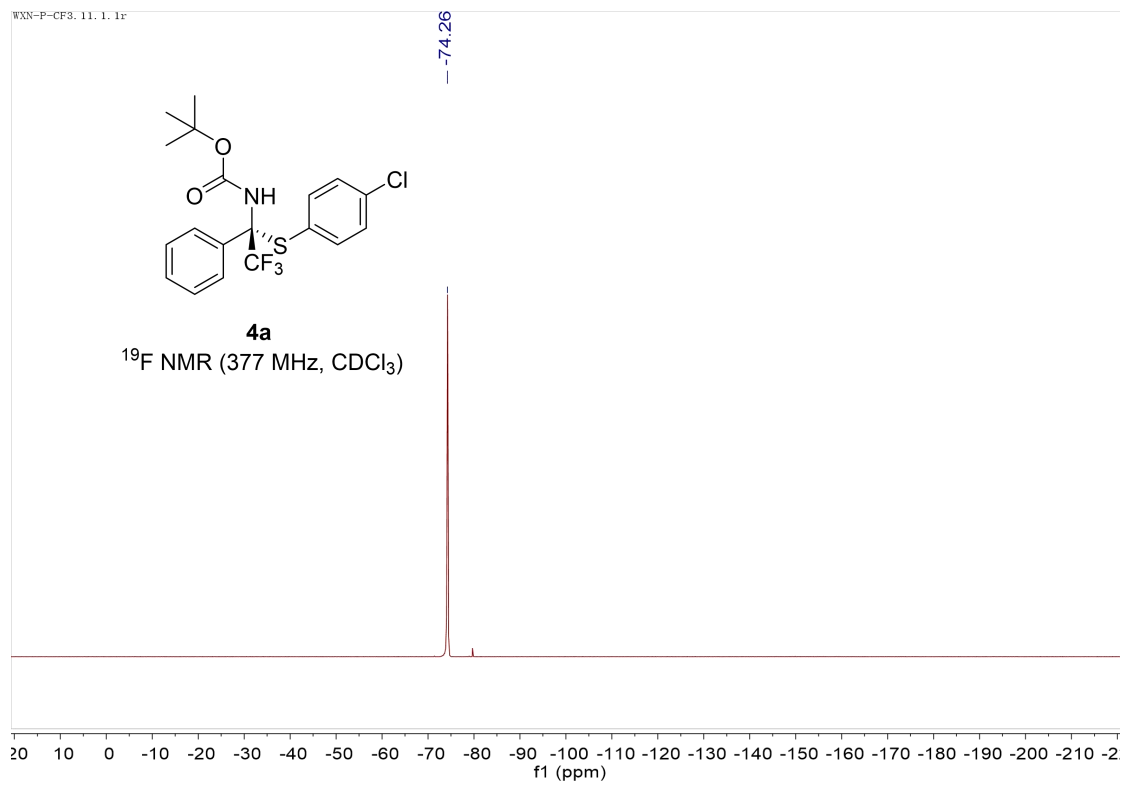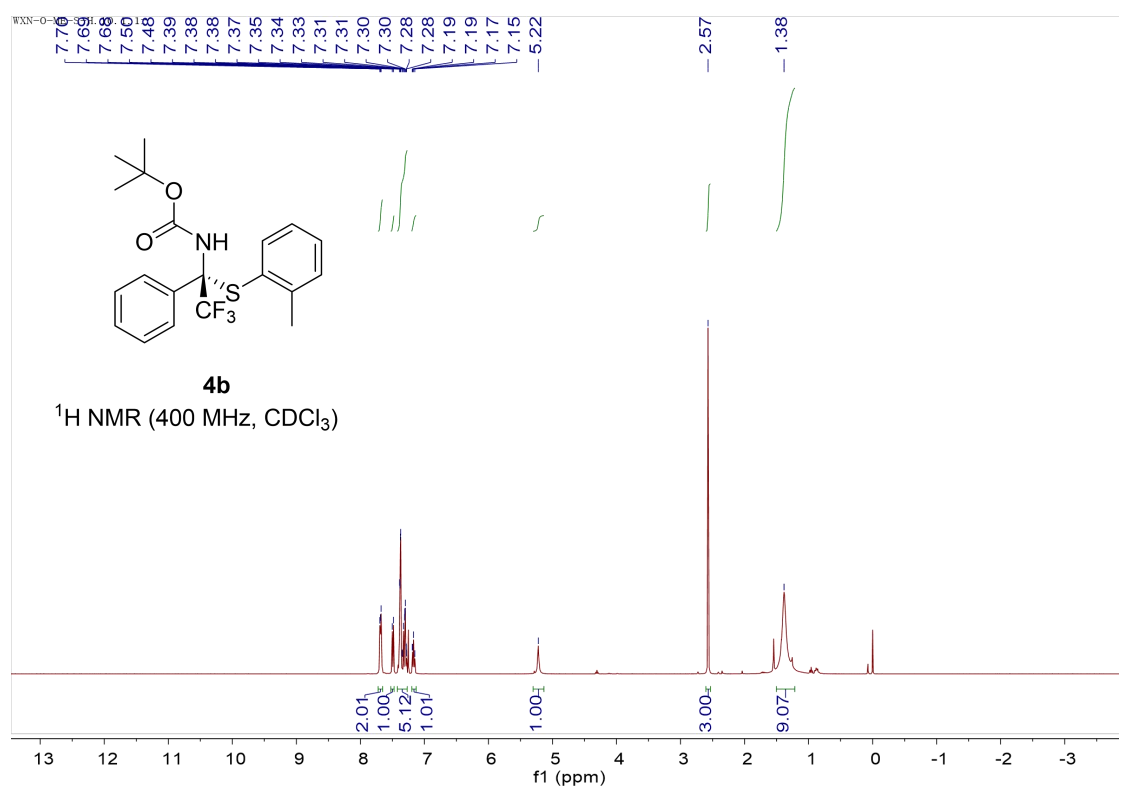

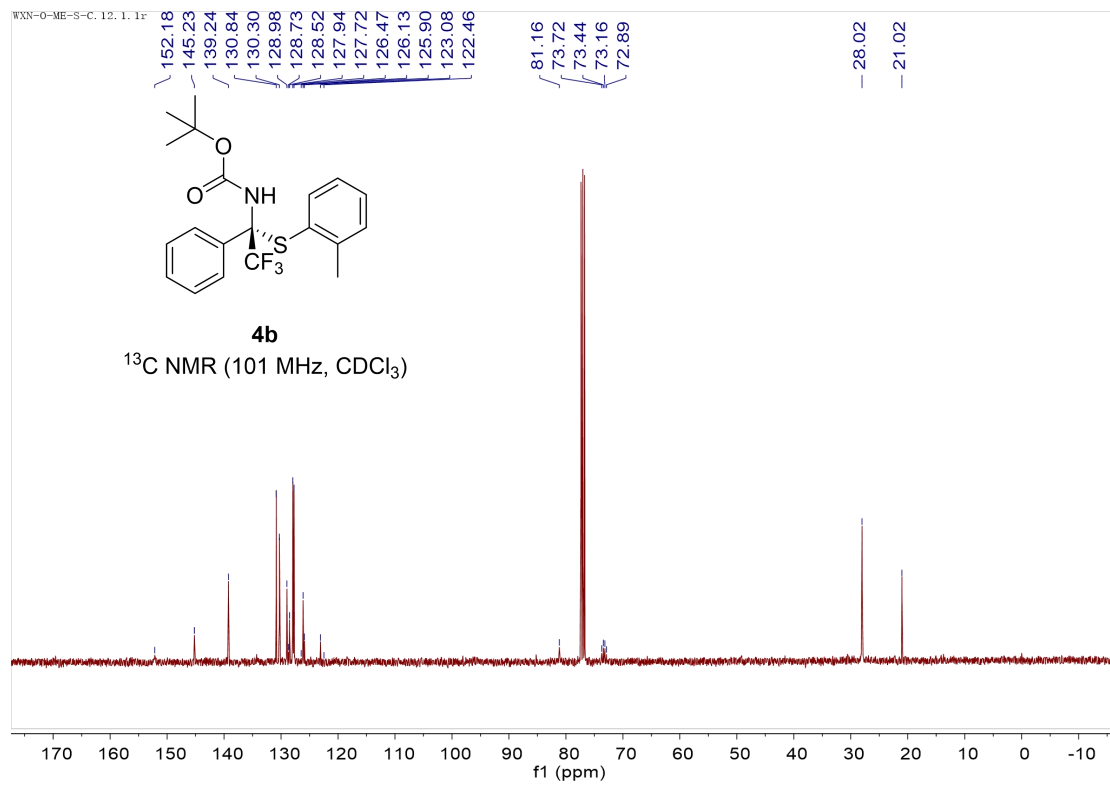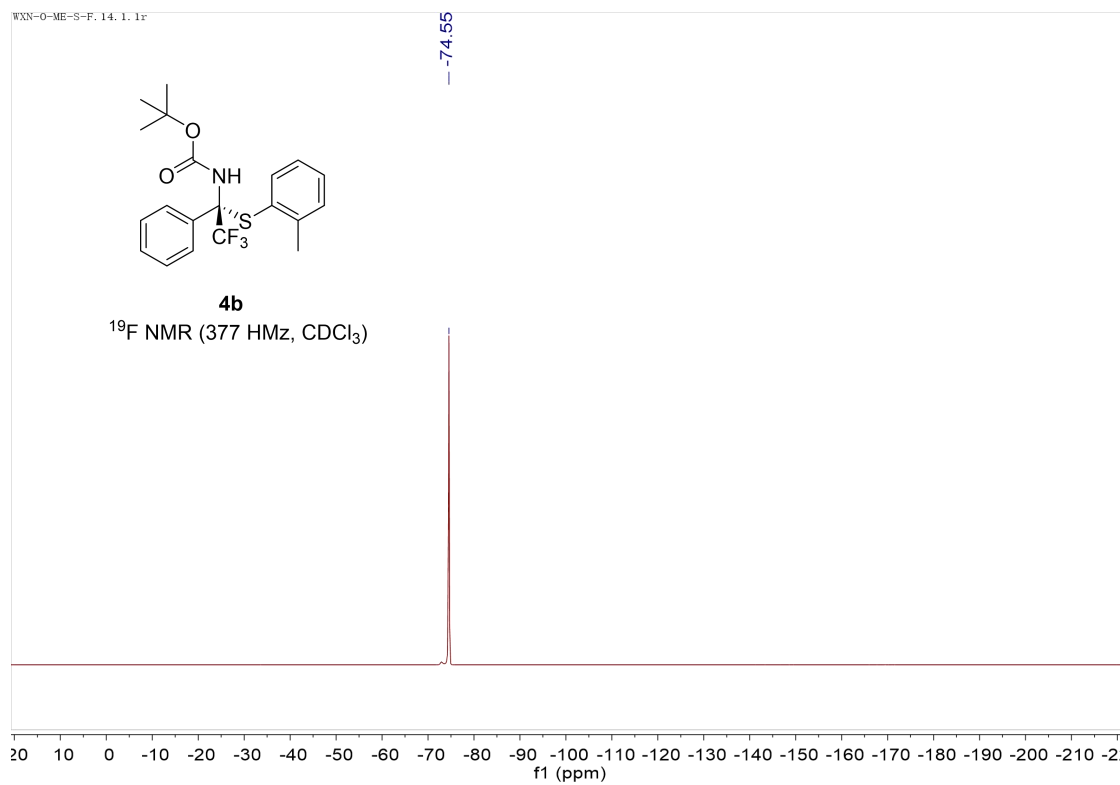

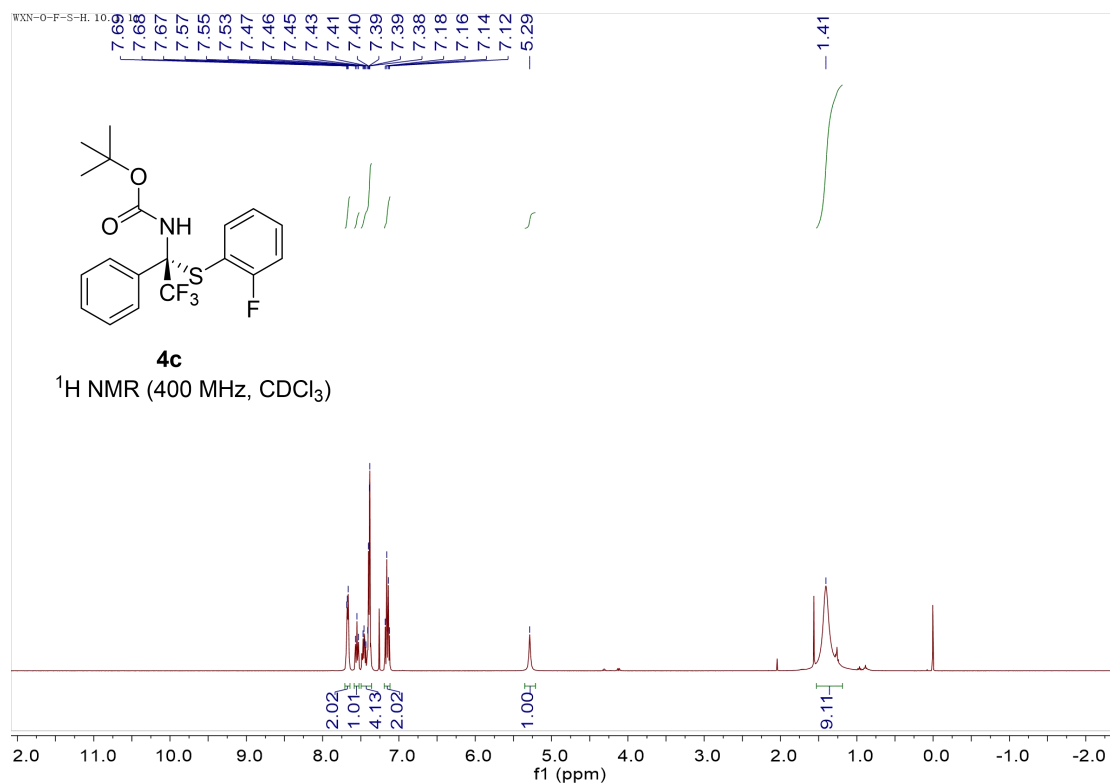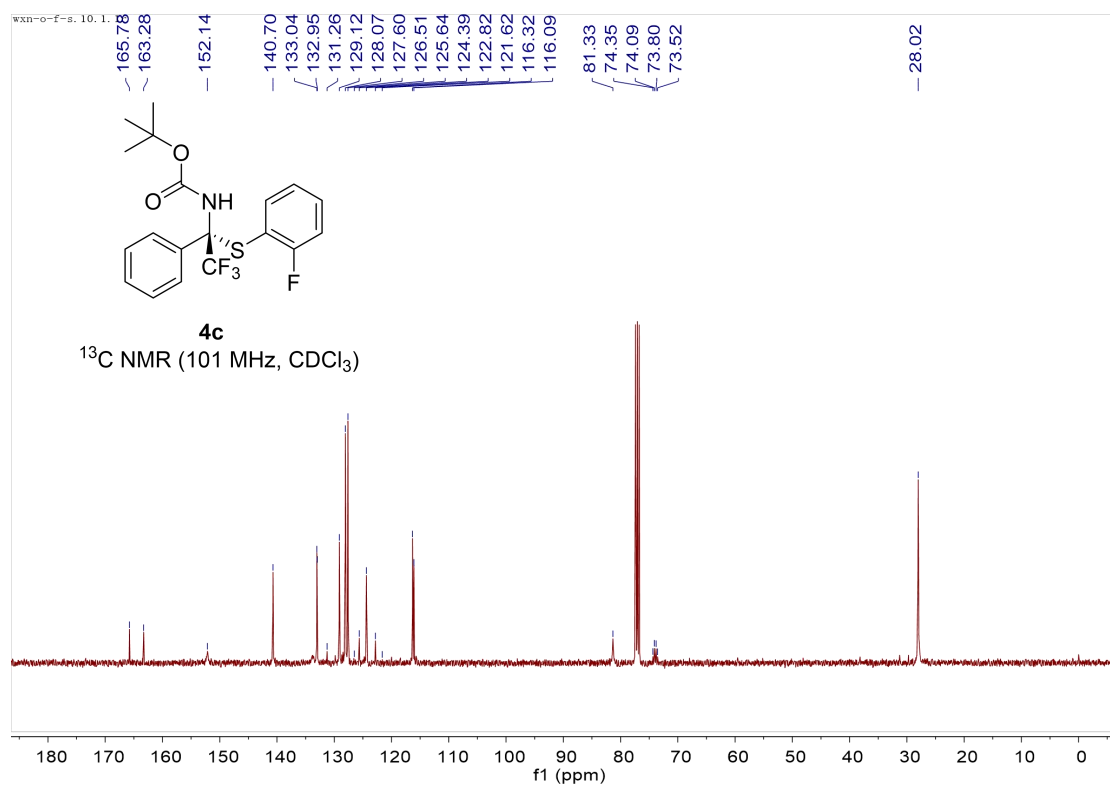



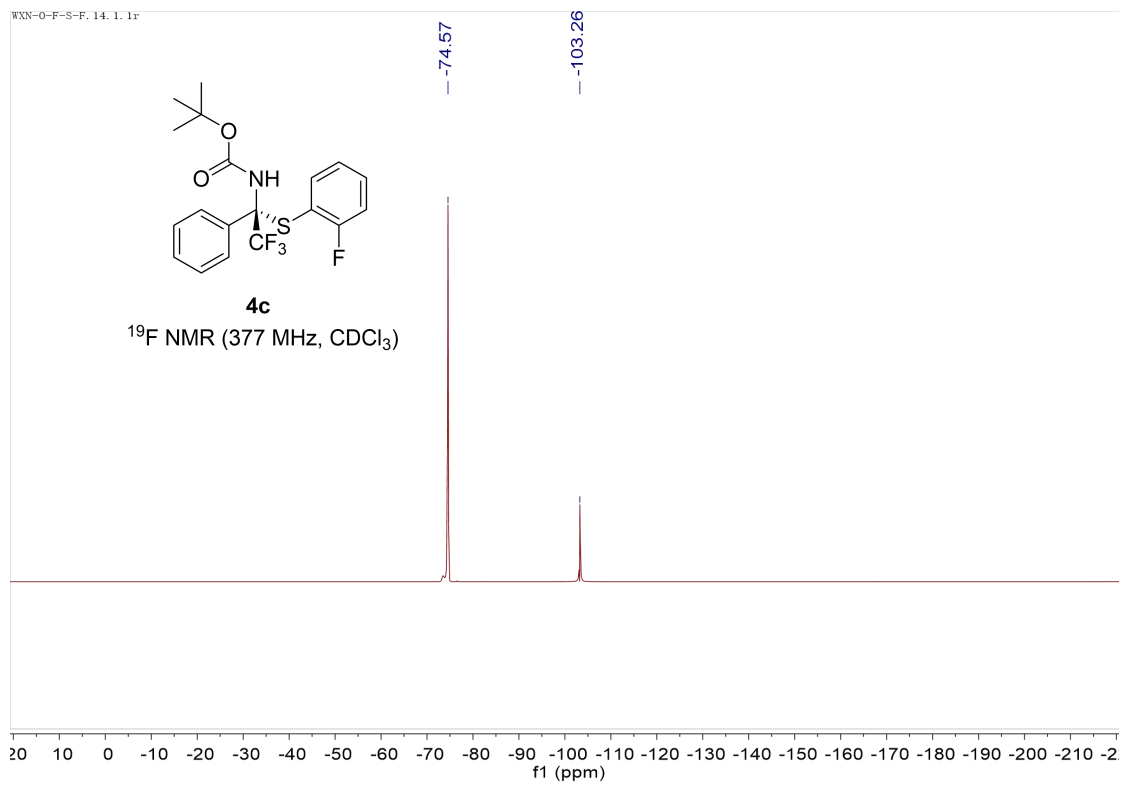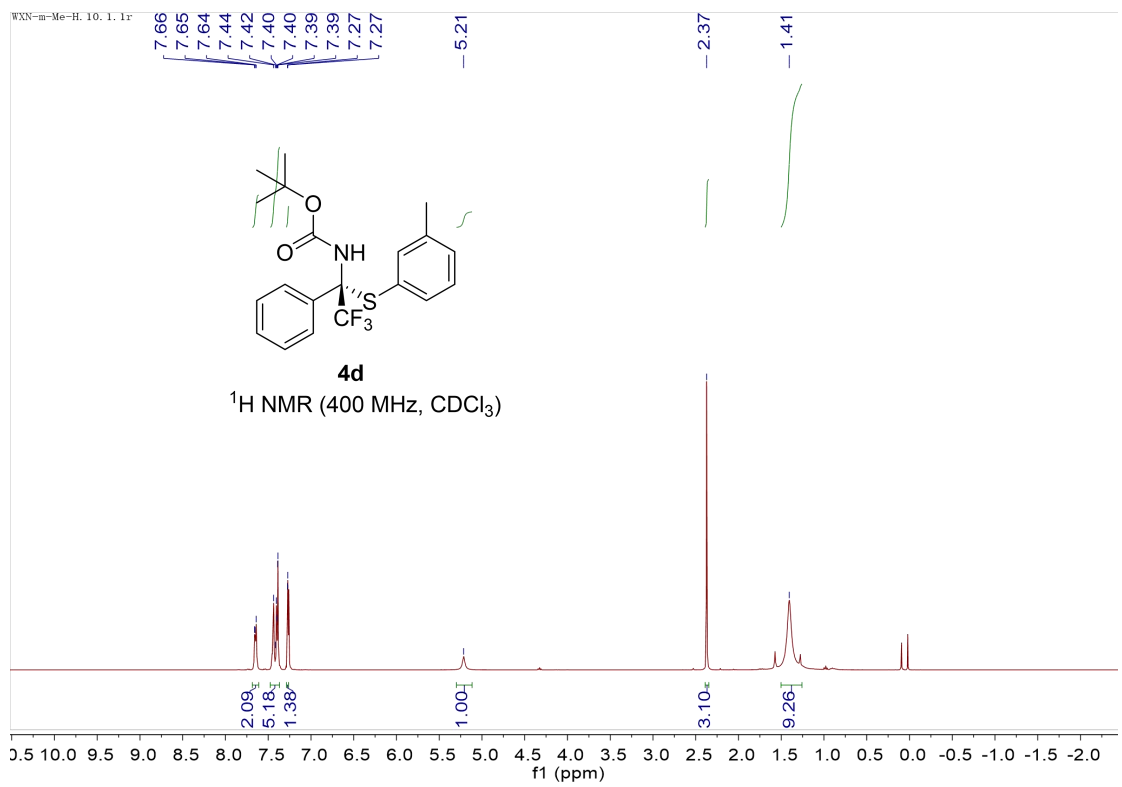

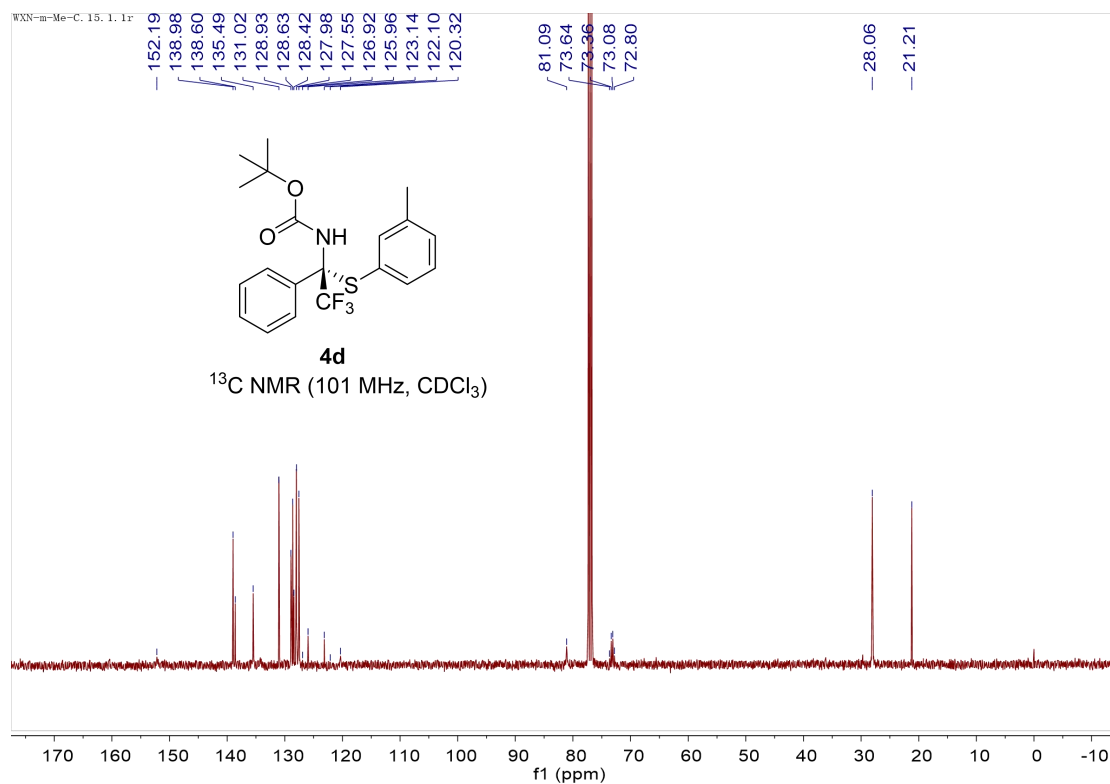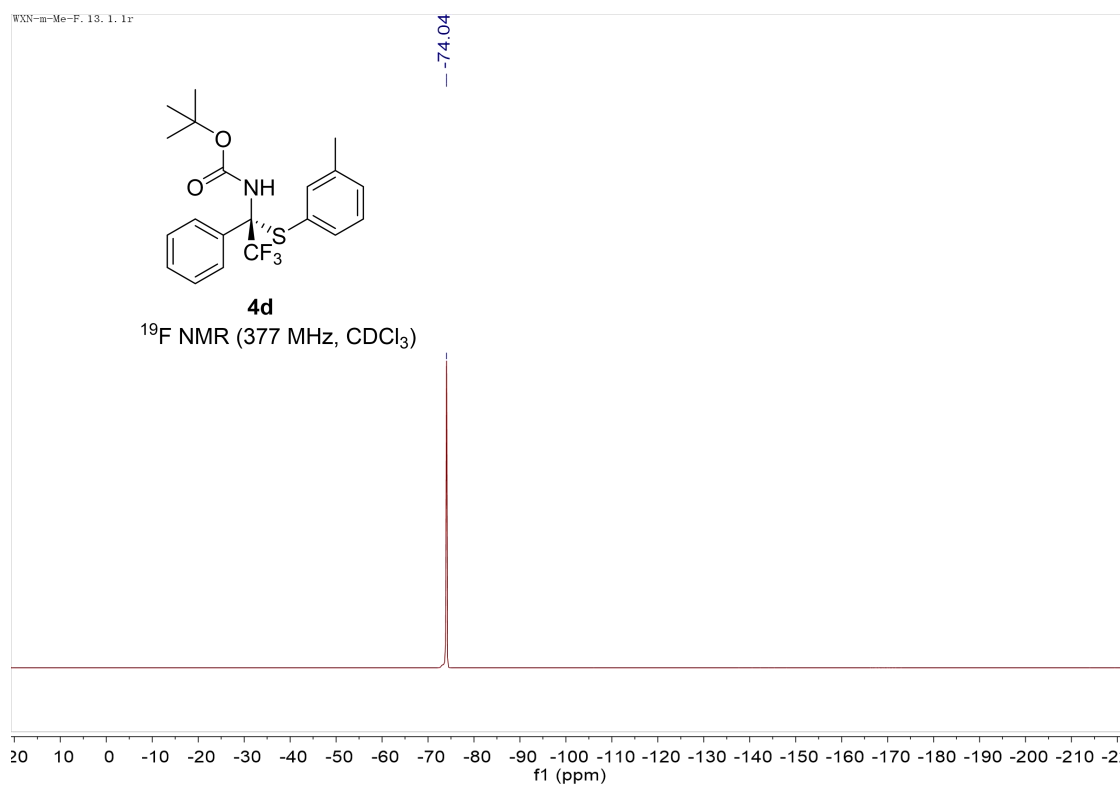

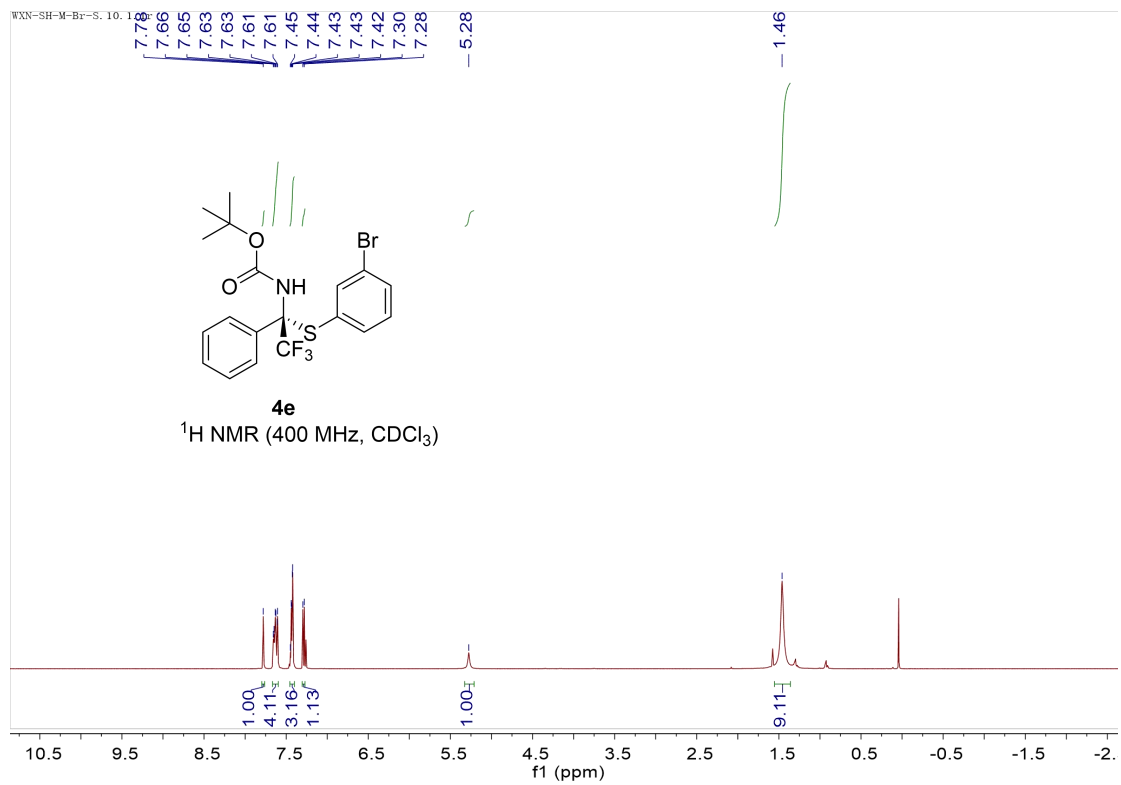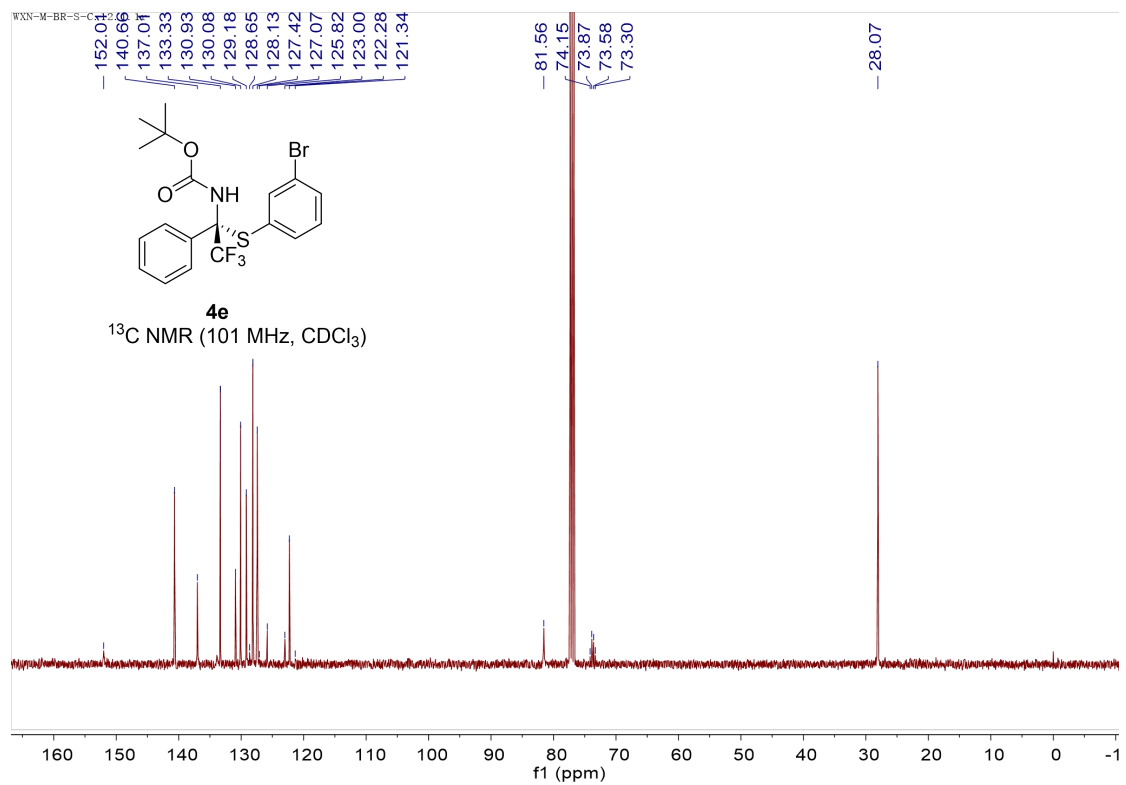

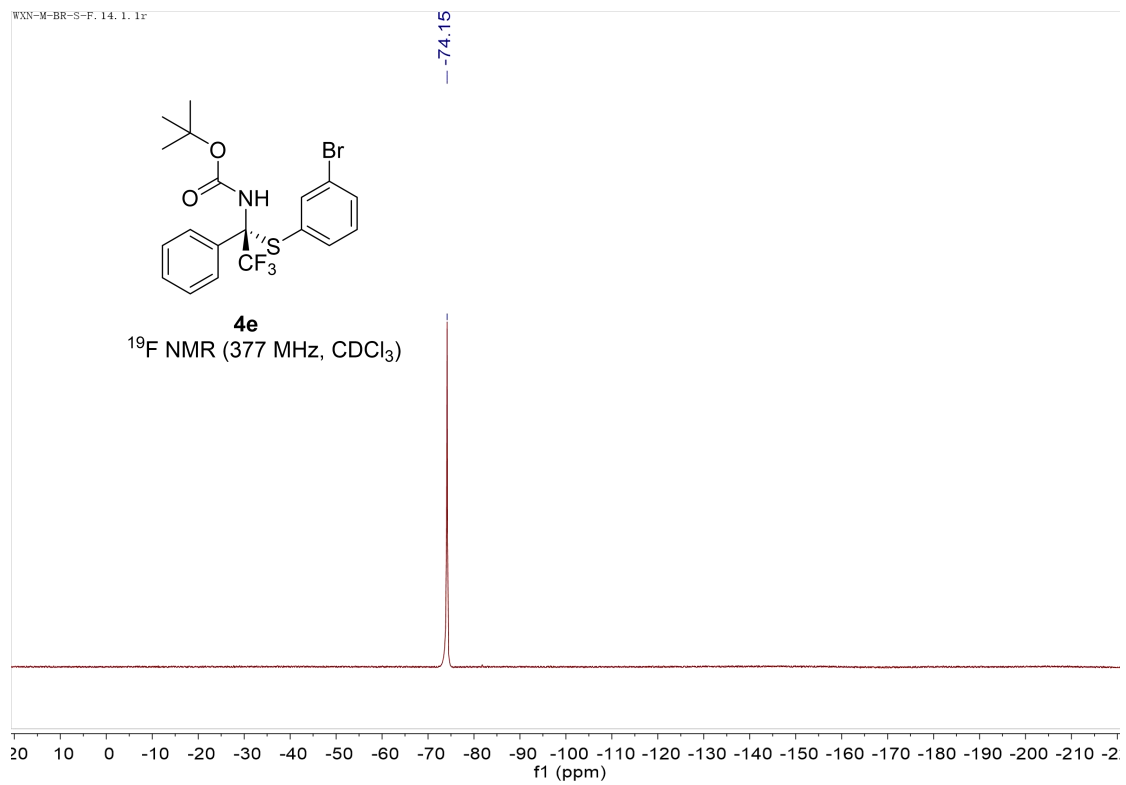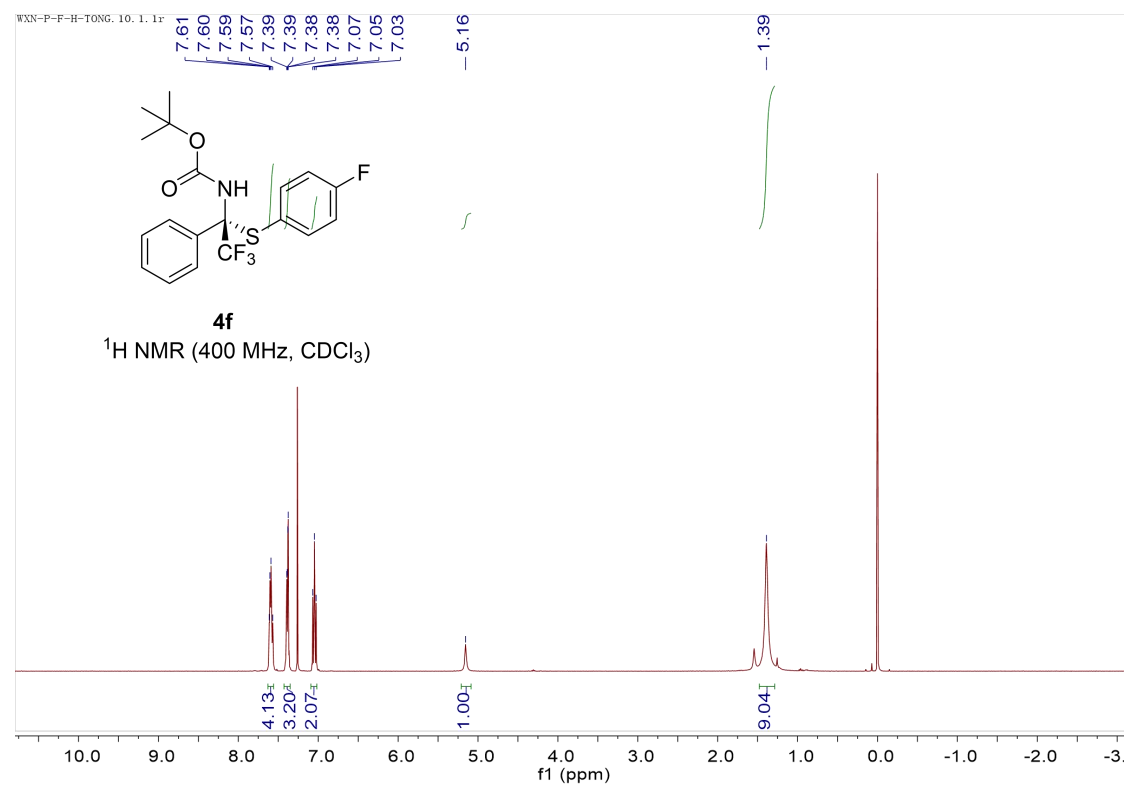

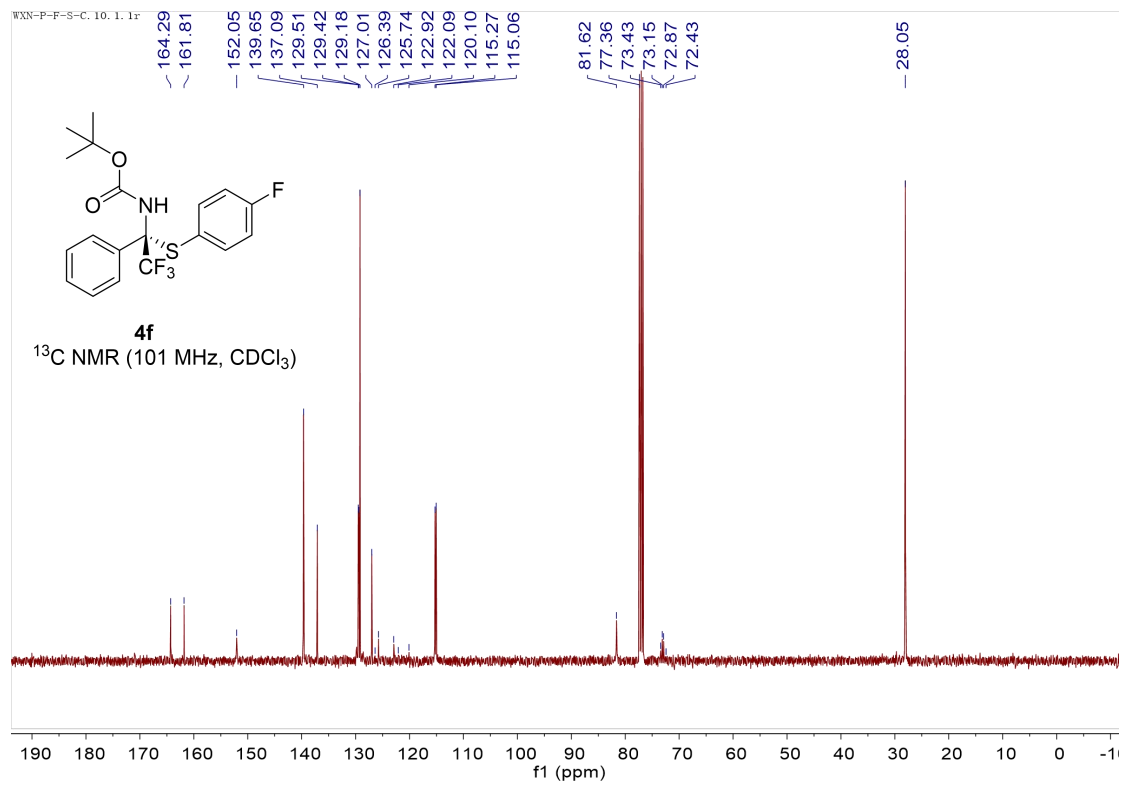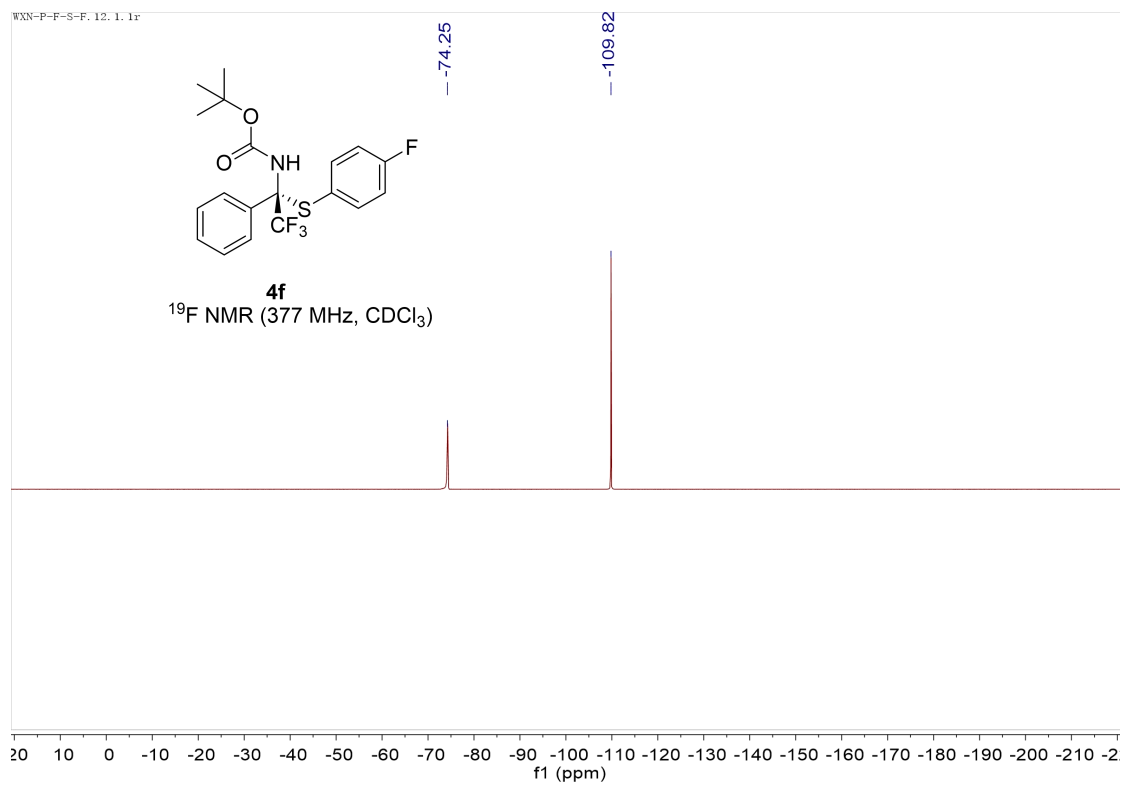

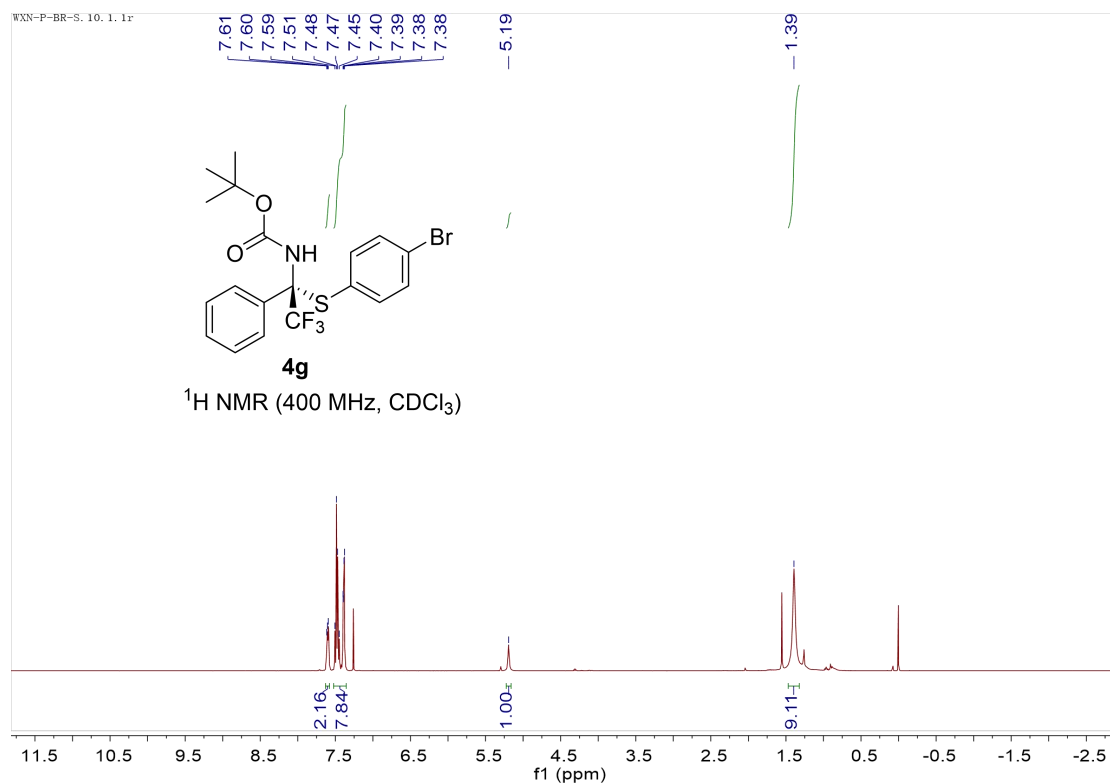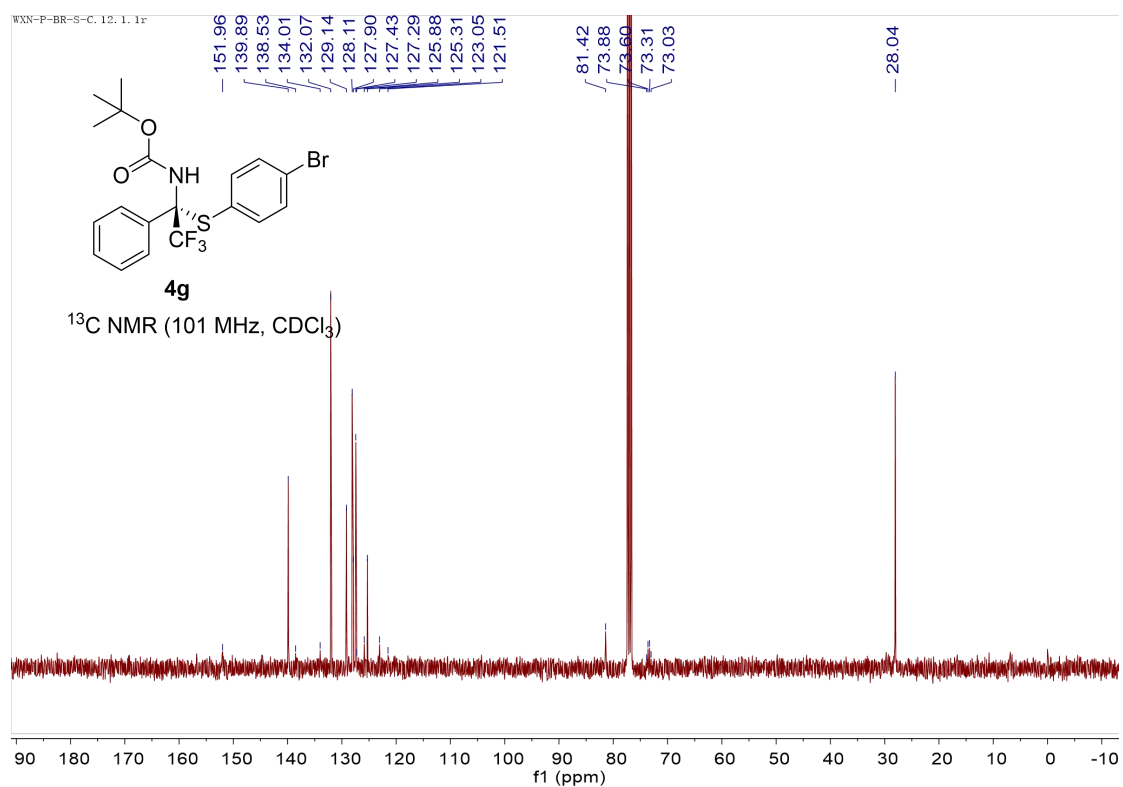

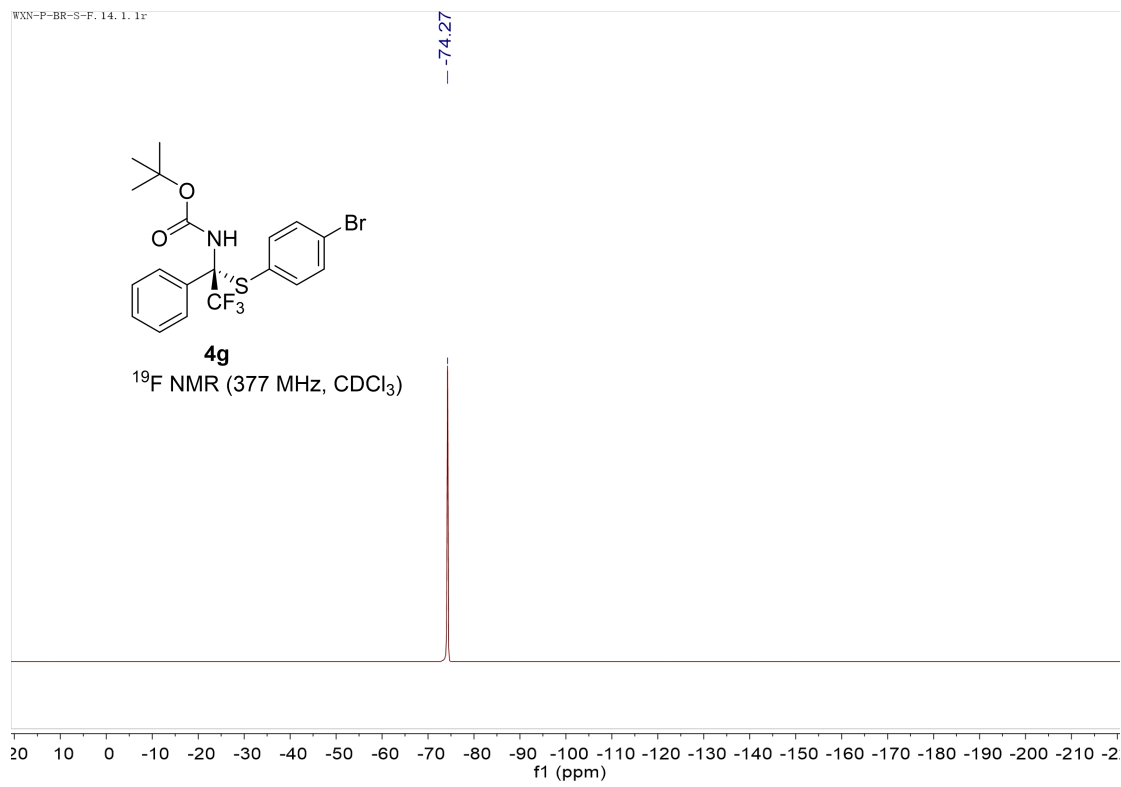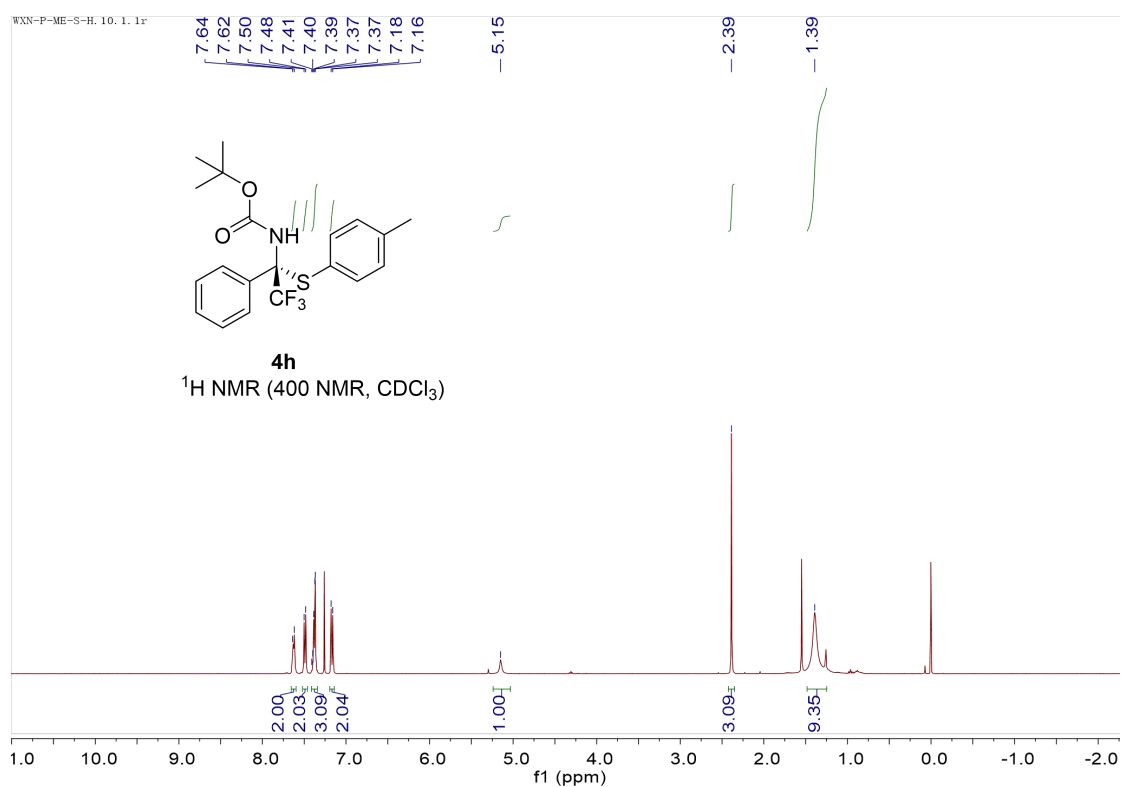

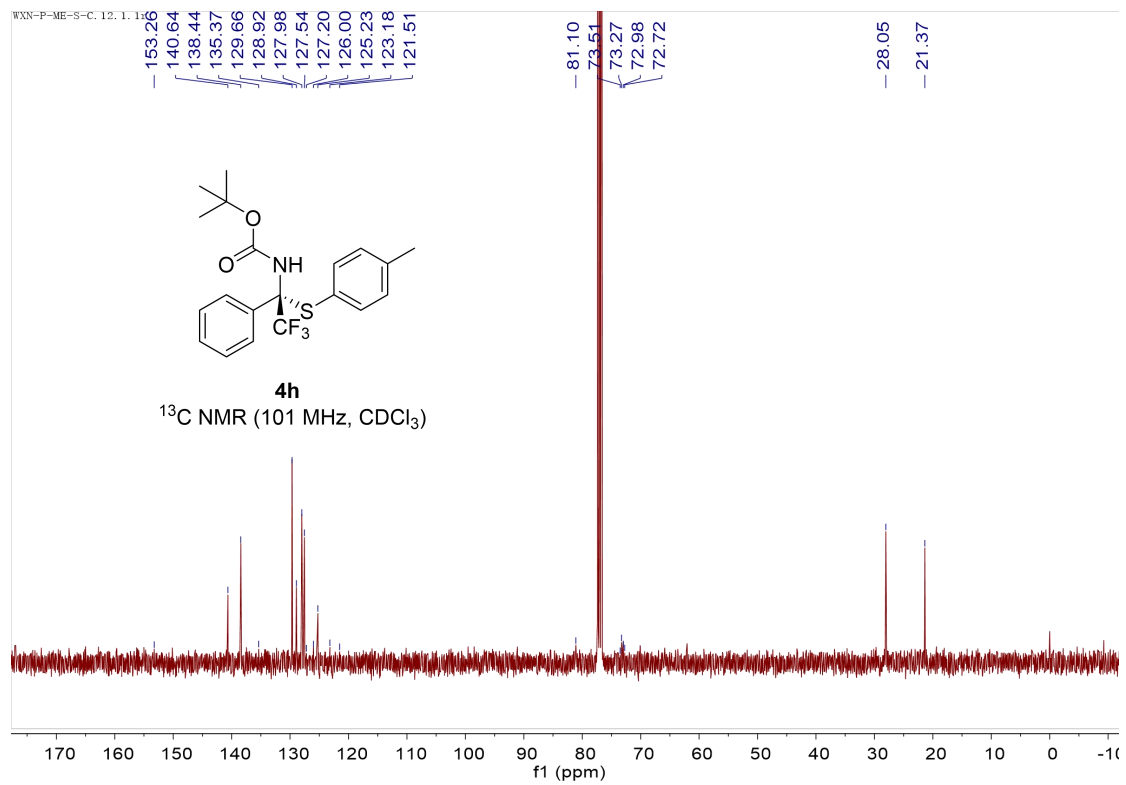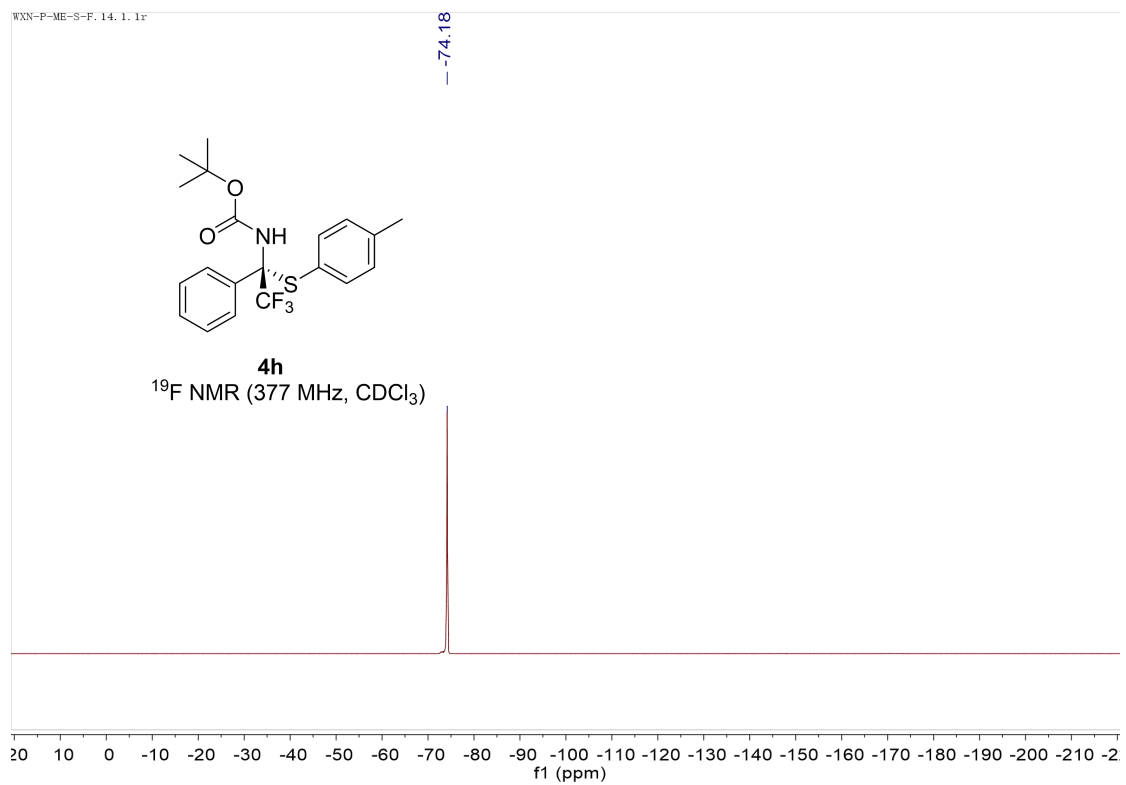



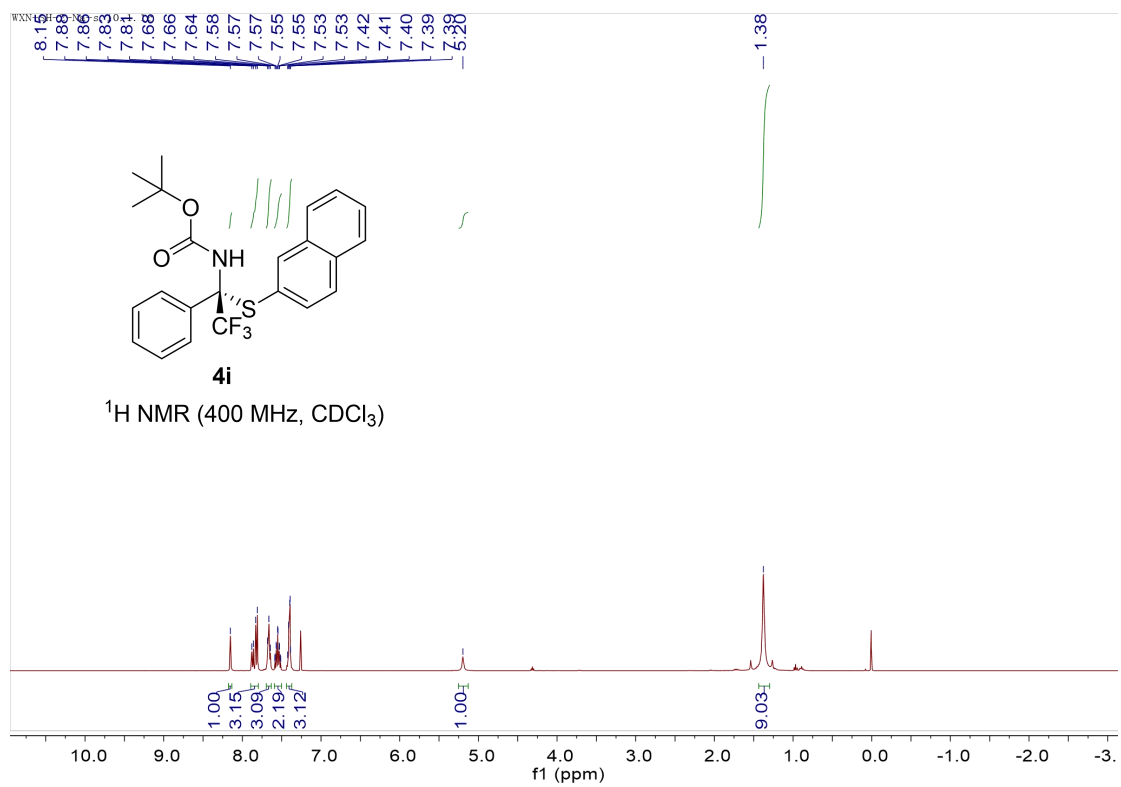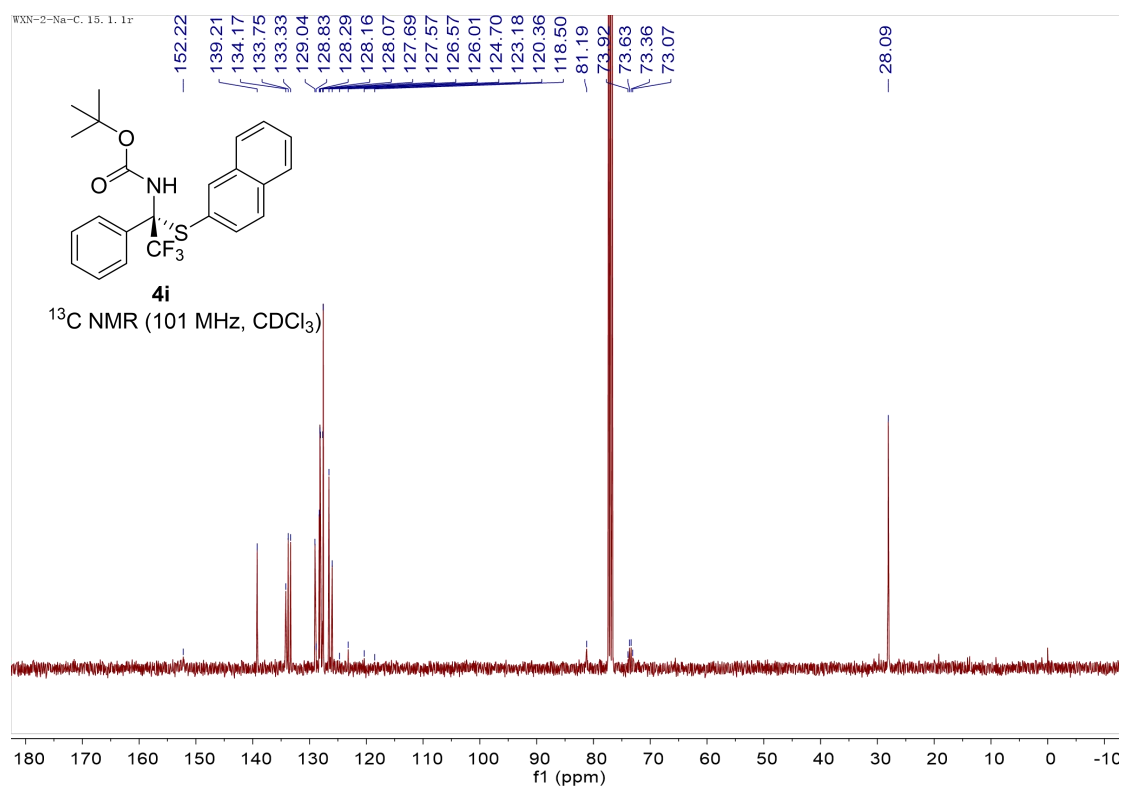

WXN-2-Na-F. 13. 1. 1r

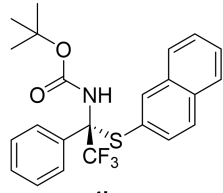

**4i**

<sup>19</sup>F NMR (377 MHz, CDCl<sub>3</sub>)

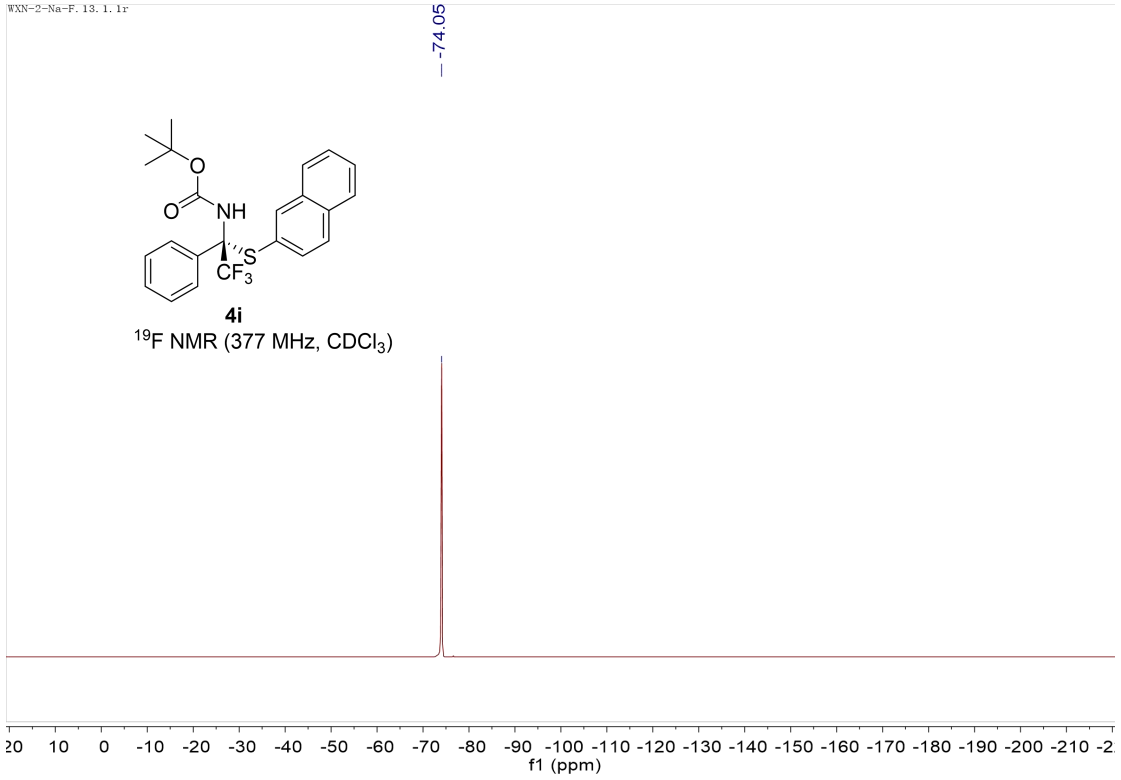

WXN-p-F-S-H. 10. 1. 1r

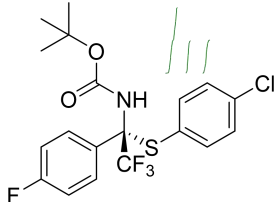

**4j**

<sup>1</sup>H NMR (400 MHz, CDCl<sub>3</sub>)

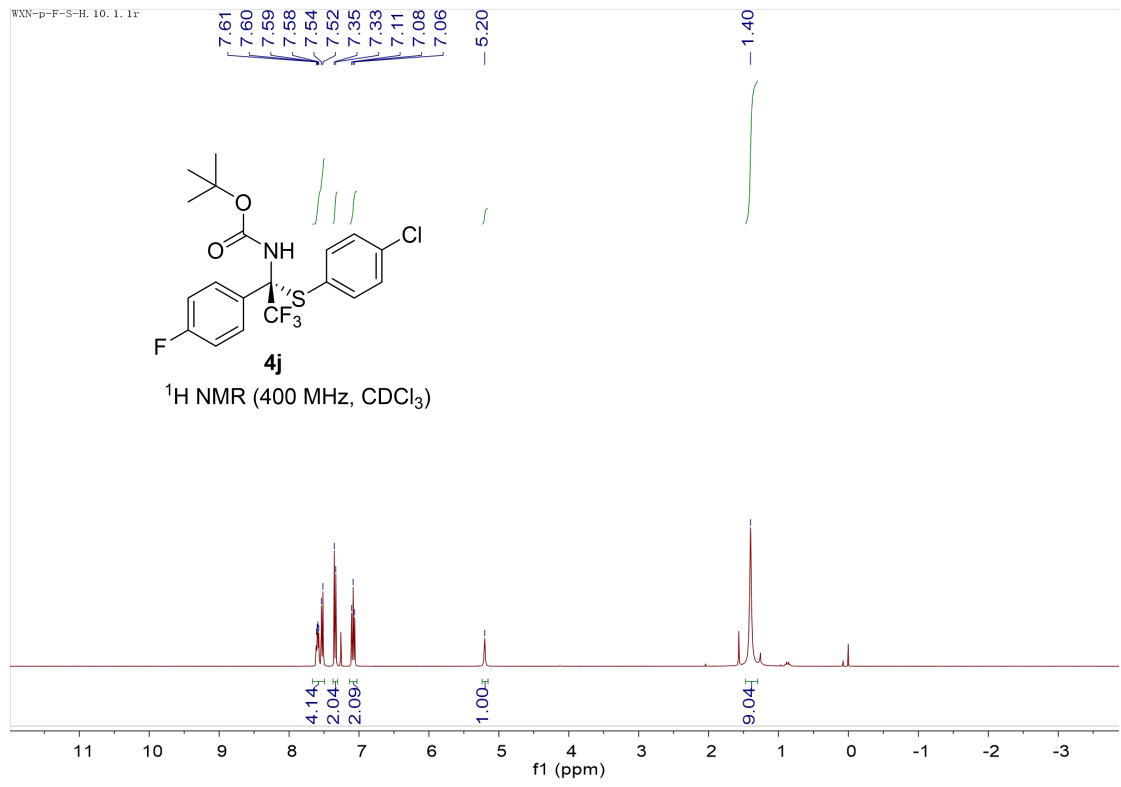

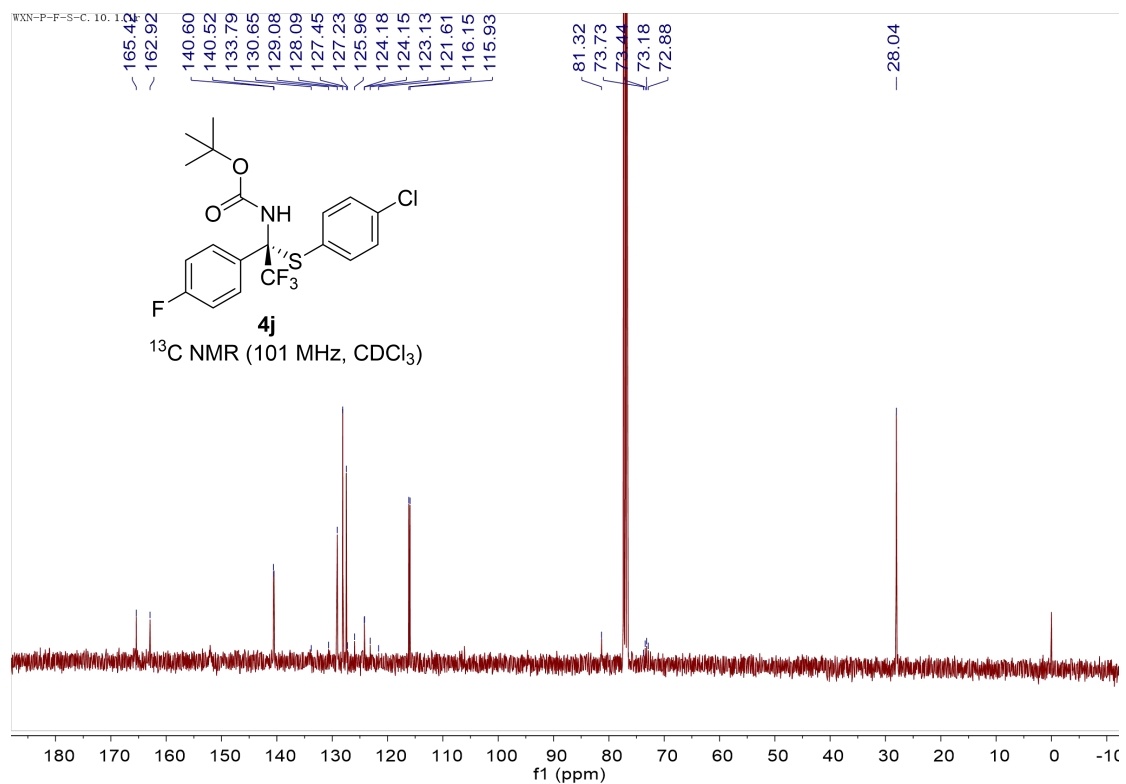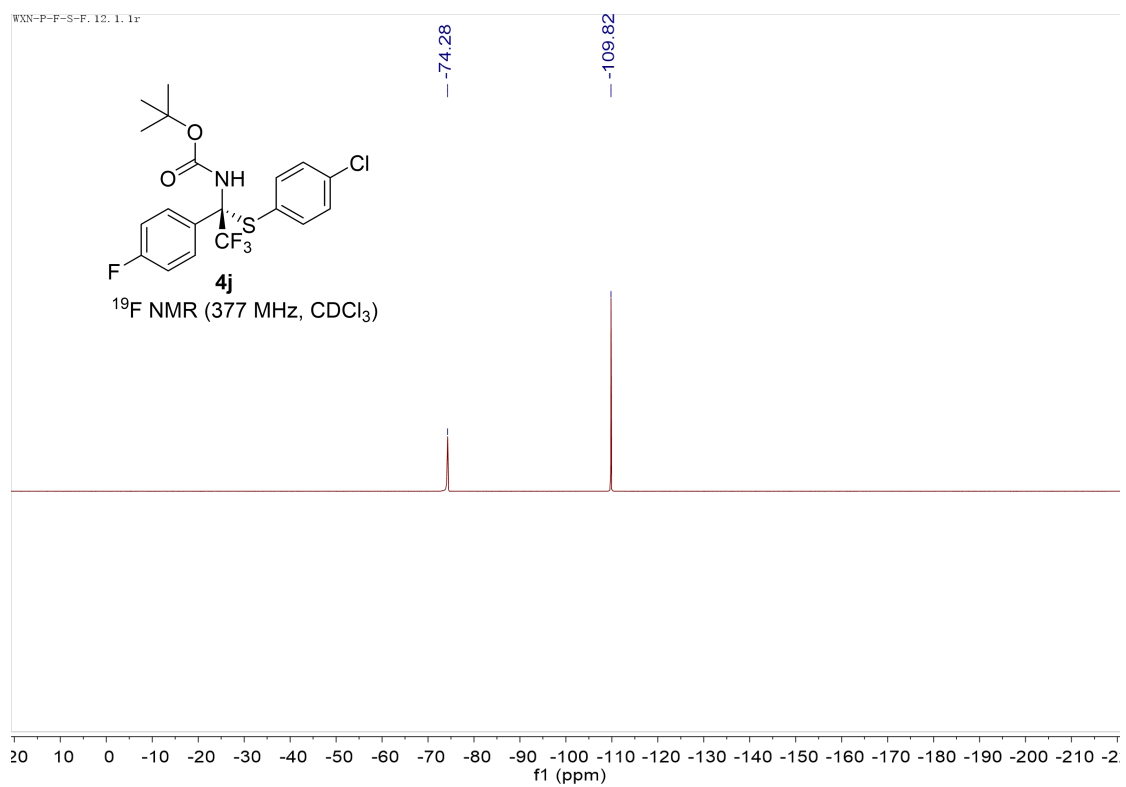

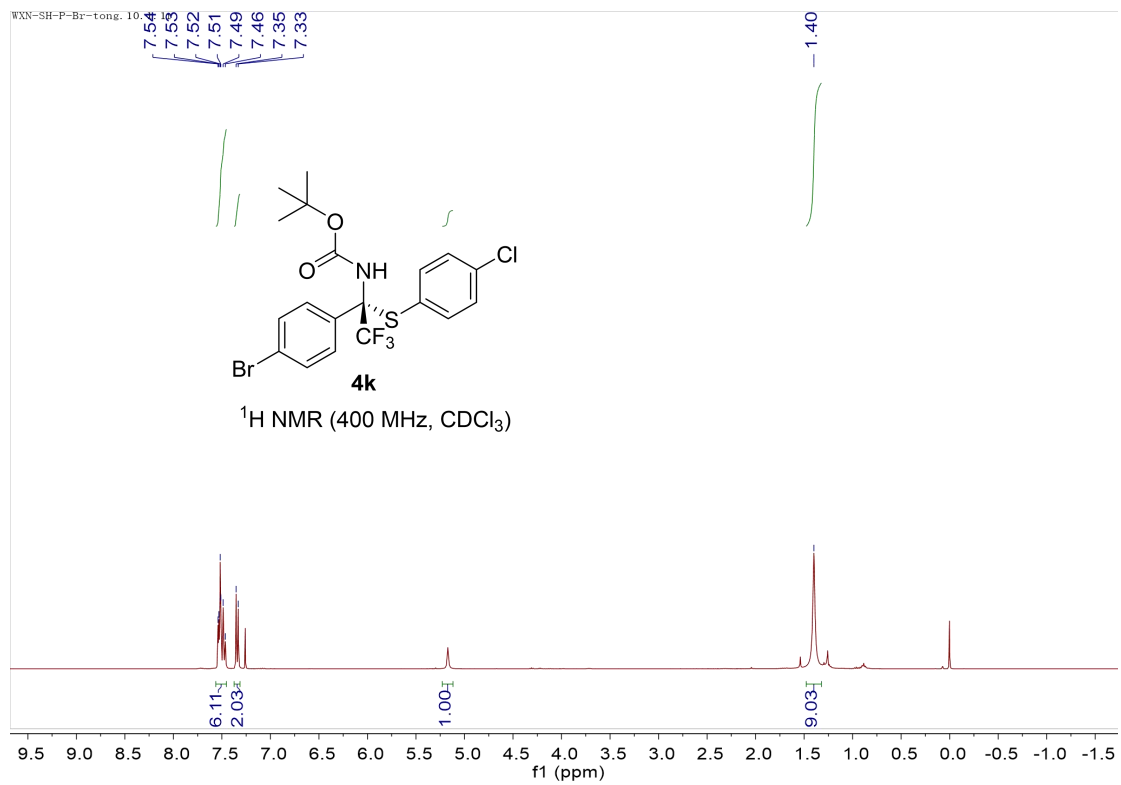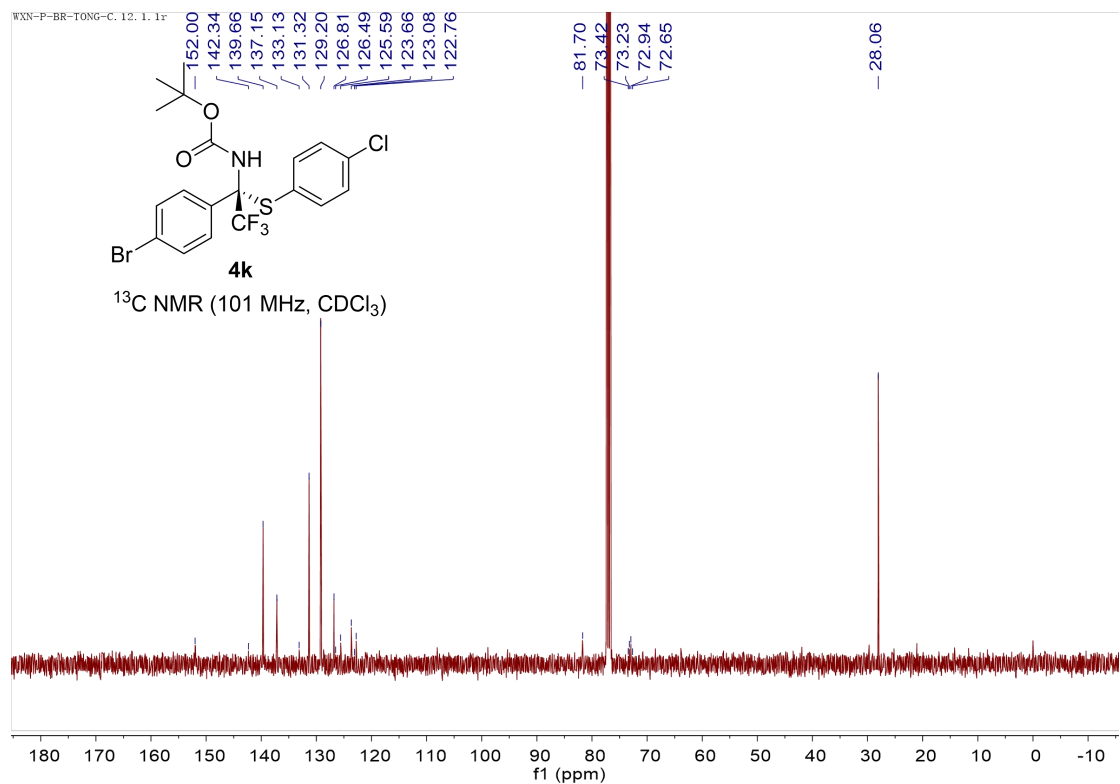

WXN-P-BR-TONG-F. 14. 1. 1f

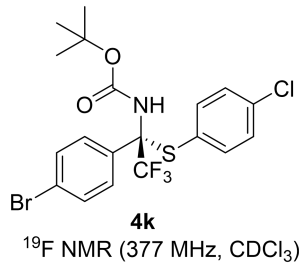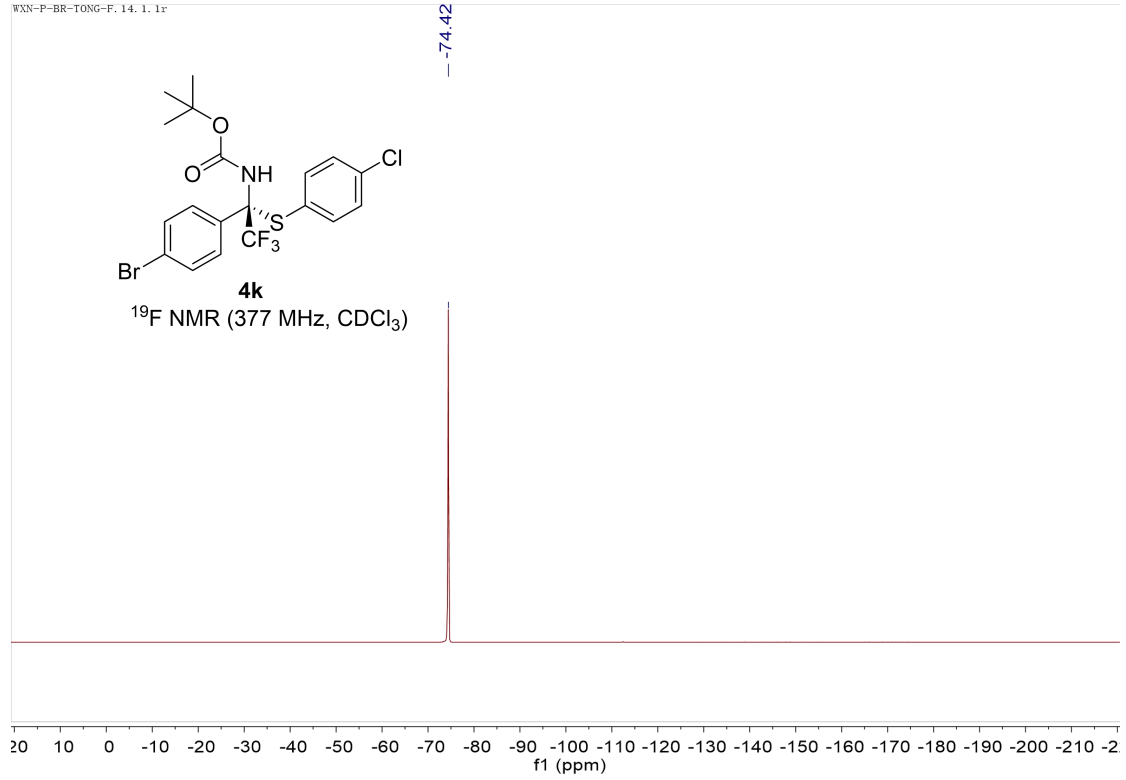

WXN-P-ME-TONG-H. 26. 1. 1f

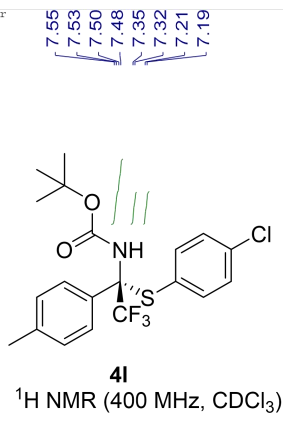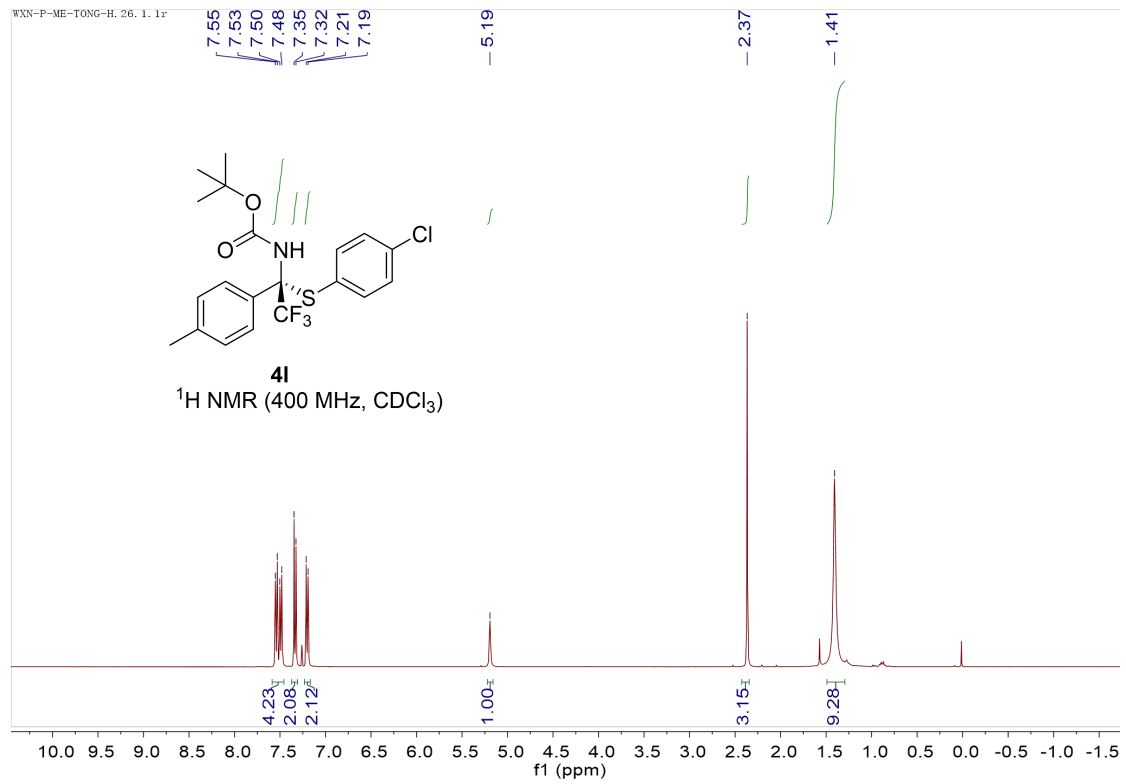

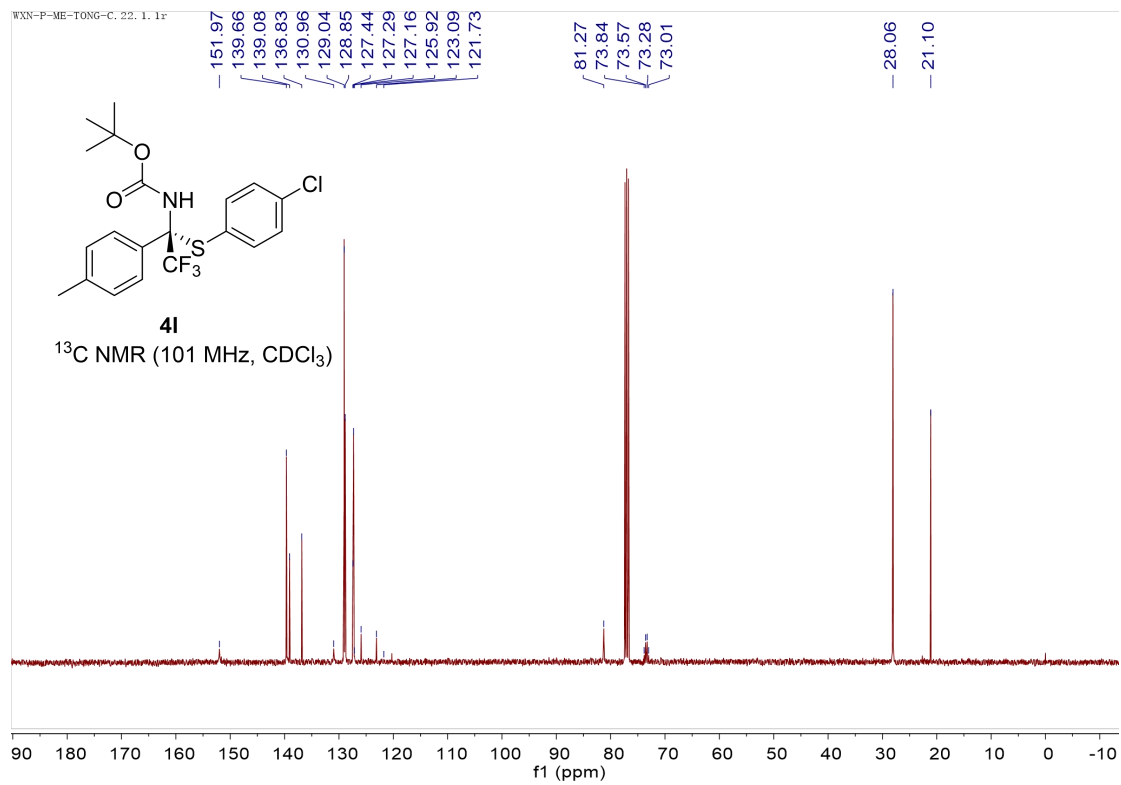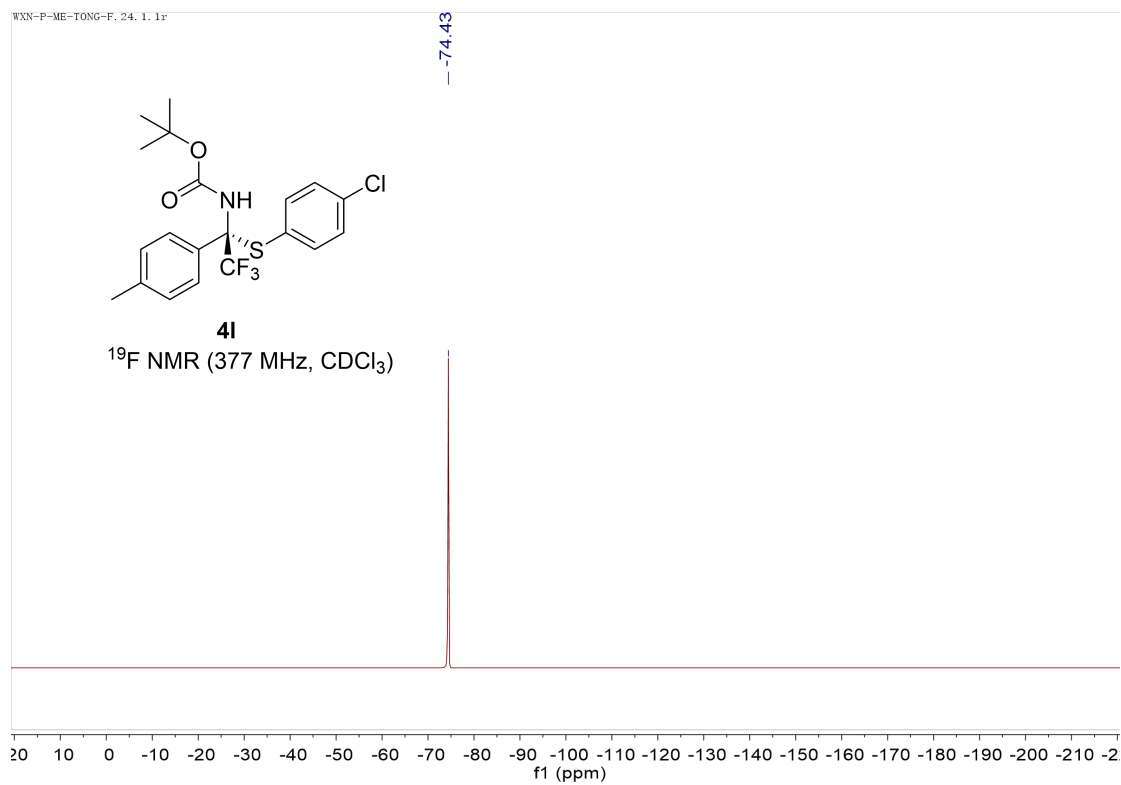

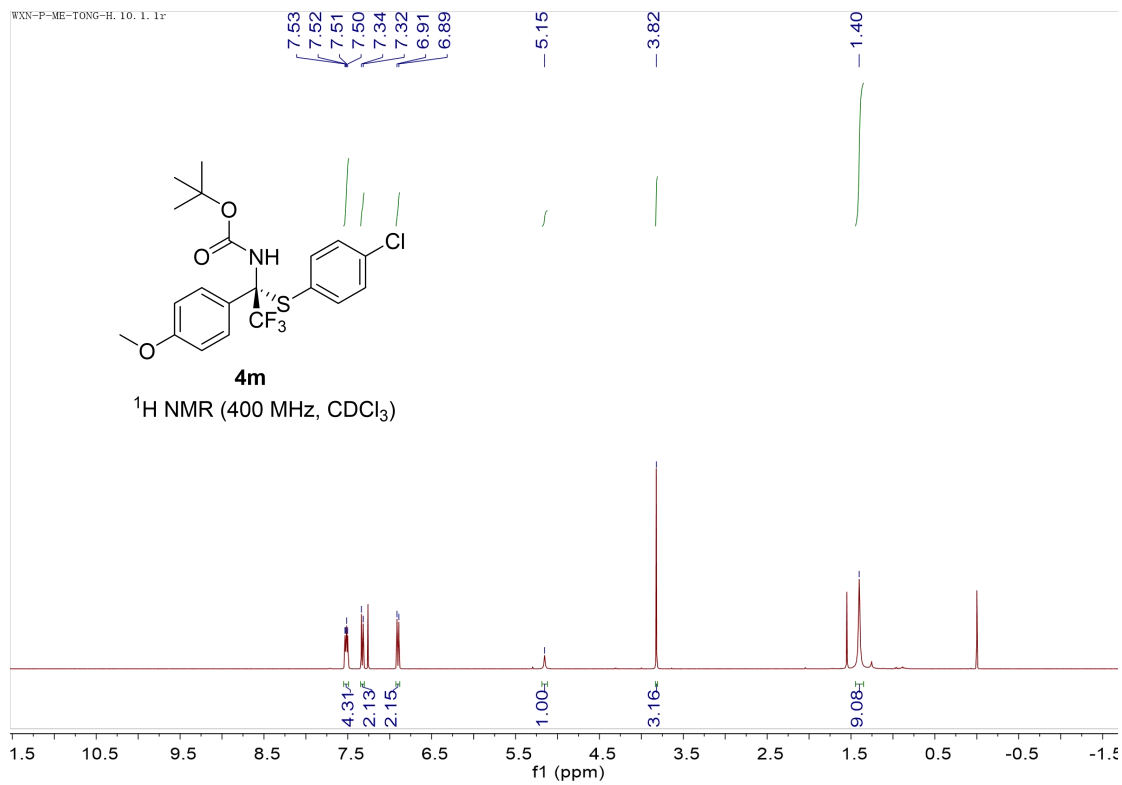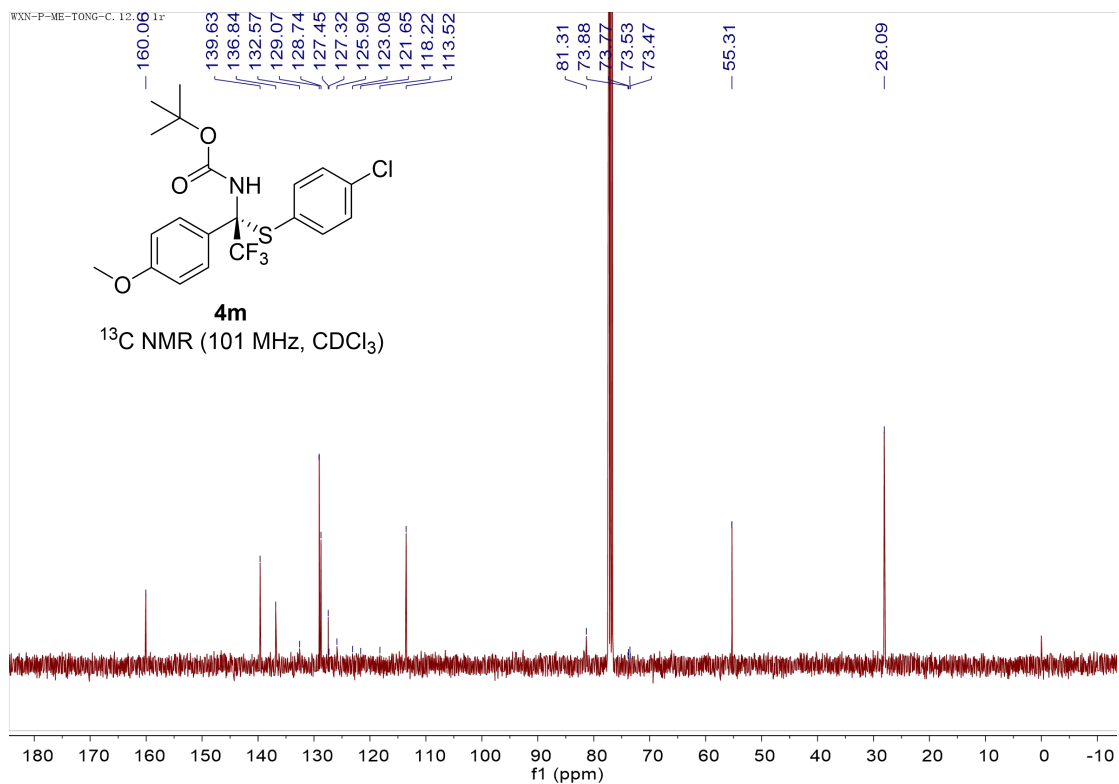

WXN-P-ME-TONG-F. 14. 1. 1f

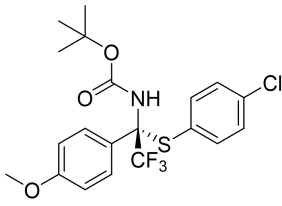

$^{19}\text{F}$  NMR (377 MHz,  $\text{CDCl}_3$ )

-74.49

20 10 0 -10 -20 -30 -40 -50 -60 -70 -80 -90 -100 -110 -120 -130 -140 -150 -160 -170 -180 -190 -200 -210 -2

f1 (ppm)

WXN-3-Cl-tong-H. 10. 1. 1f

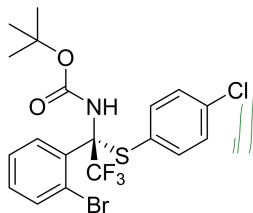

$^1\text{H}$  NMR (400 MHz,  $\text{CDCl}_3$ )

7.59  
7.54  
7.51  
7.49  
7.38  
7.38  
7.37  
7.36  
7.36  
7.35  
7.34  
7.33  
7.33  
7.31  
5.20

1.40

1.00  
3.16  
4.29  
1.00  
9.24

11.0 10.0 9.0 8.0 7.0 6.0 5.0 4.0 3.0 2.0 1.0 0.0 -1.0 -2.0 -3.0

f1 (ppm)



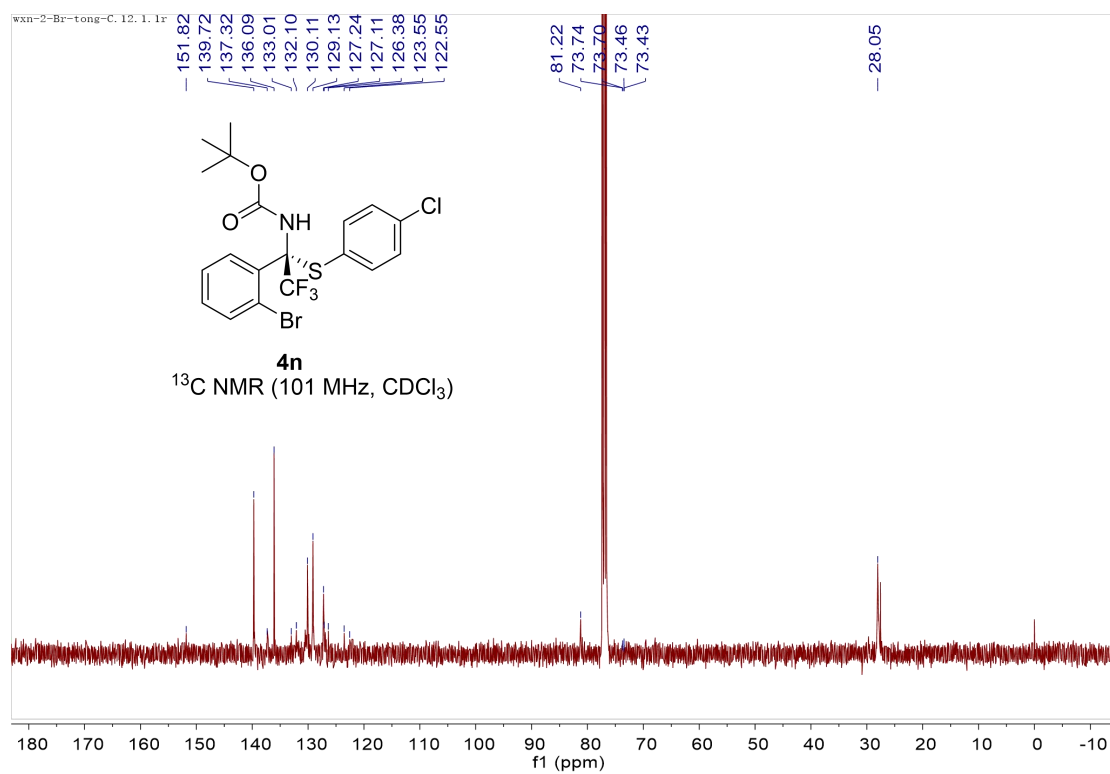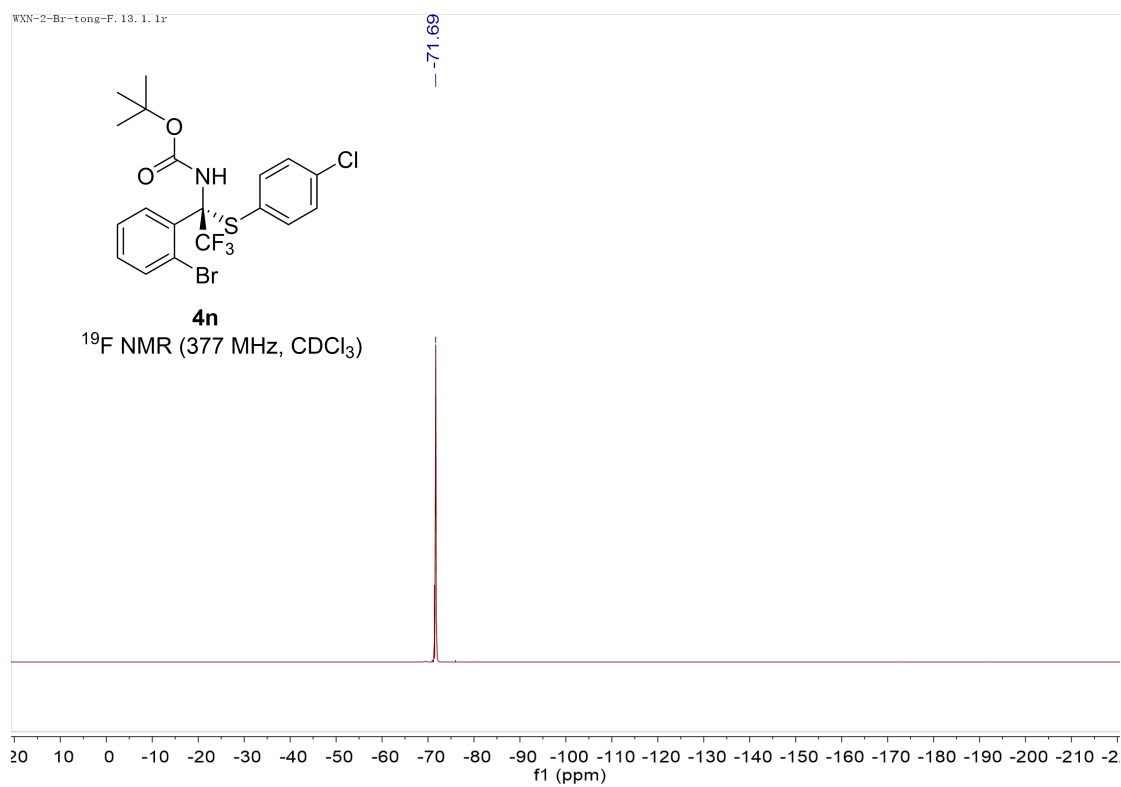

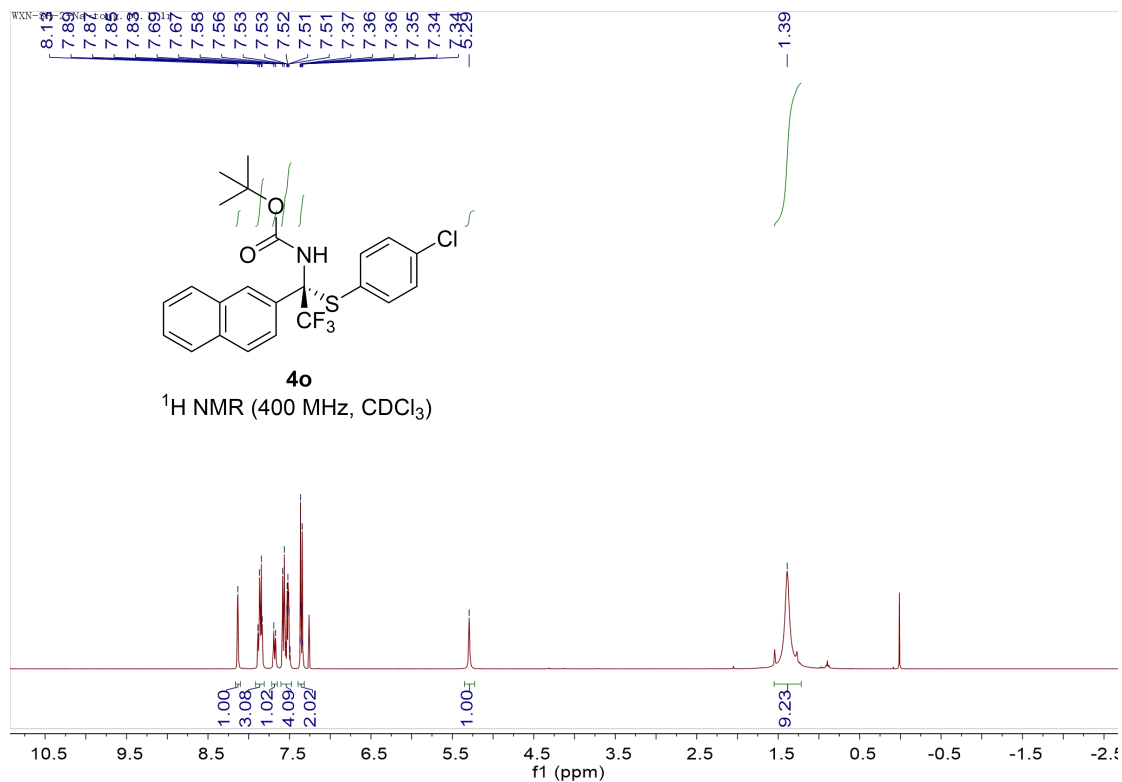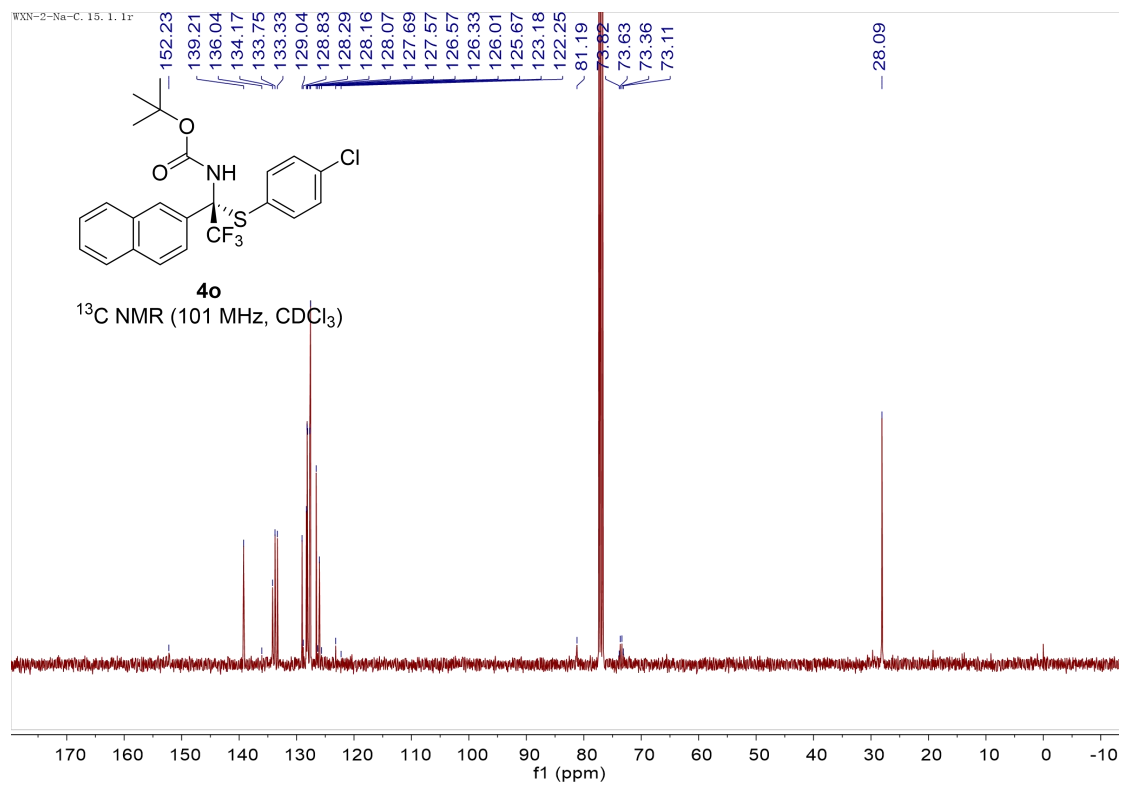

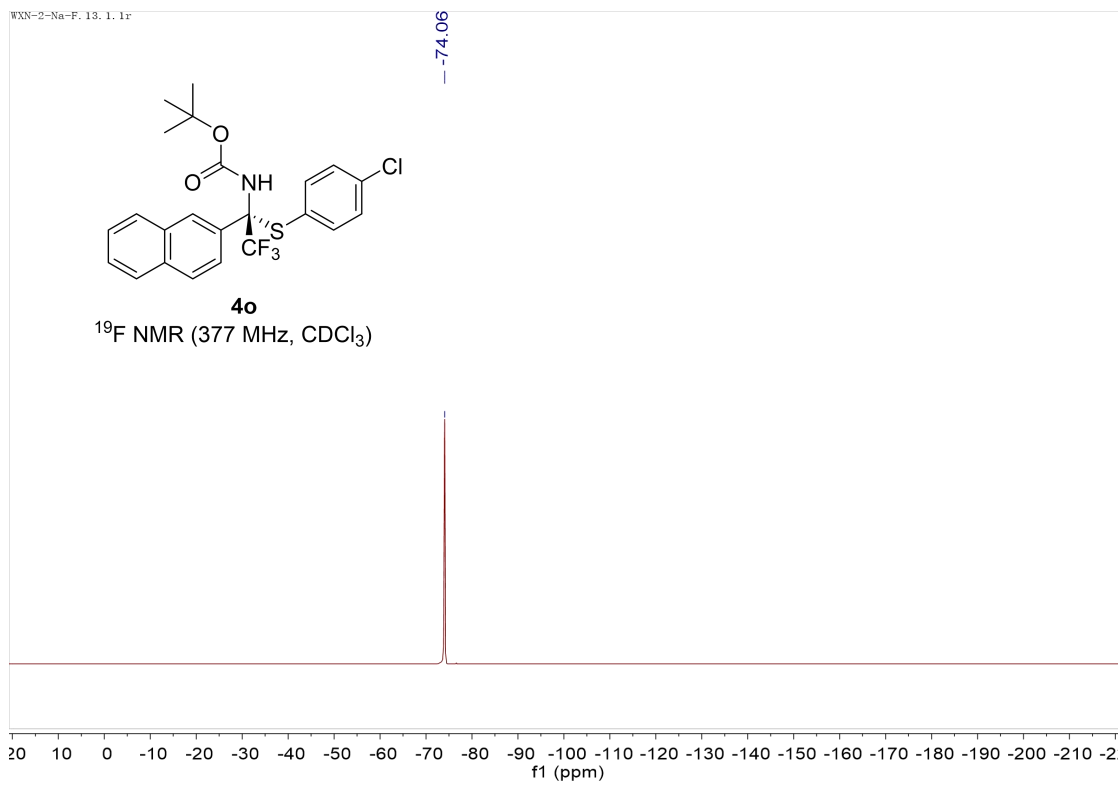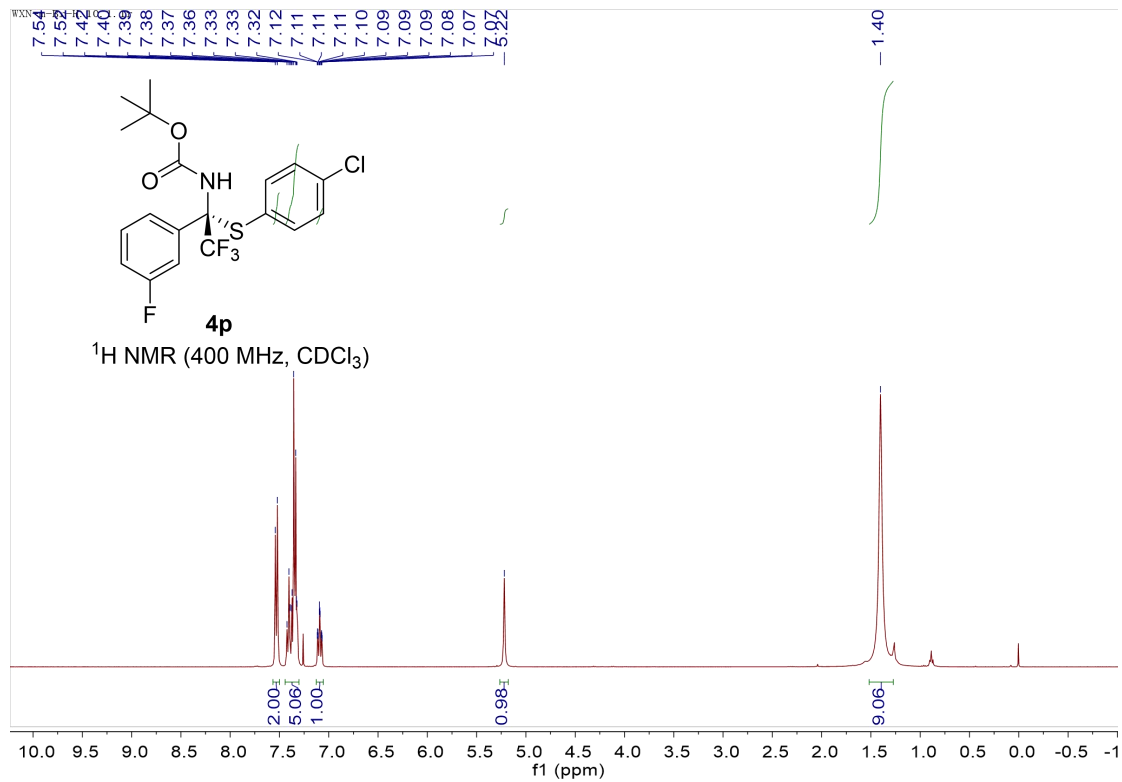

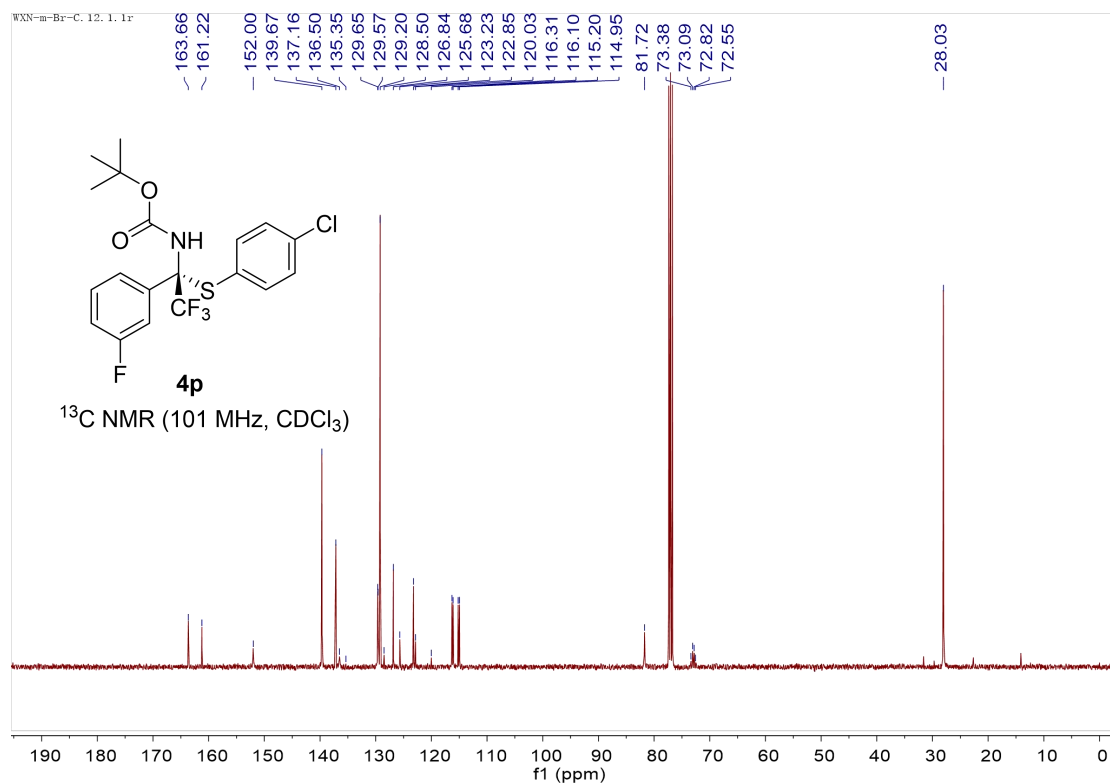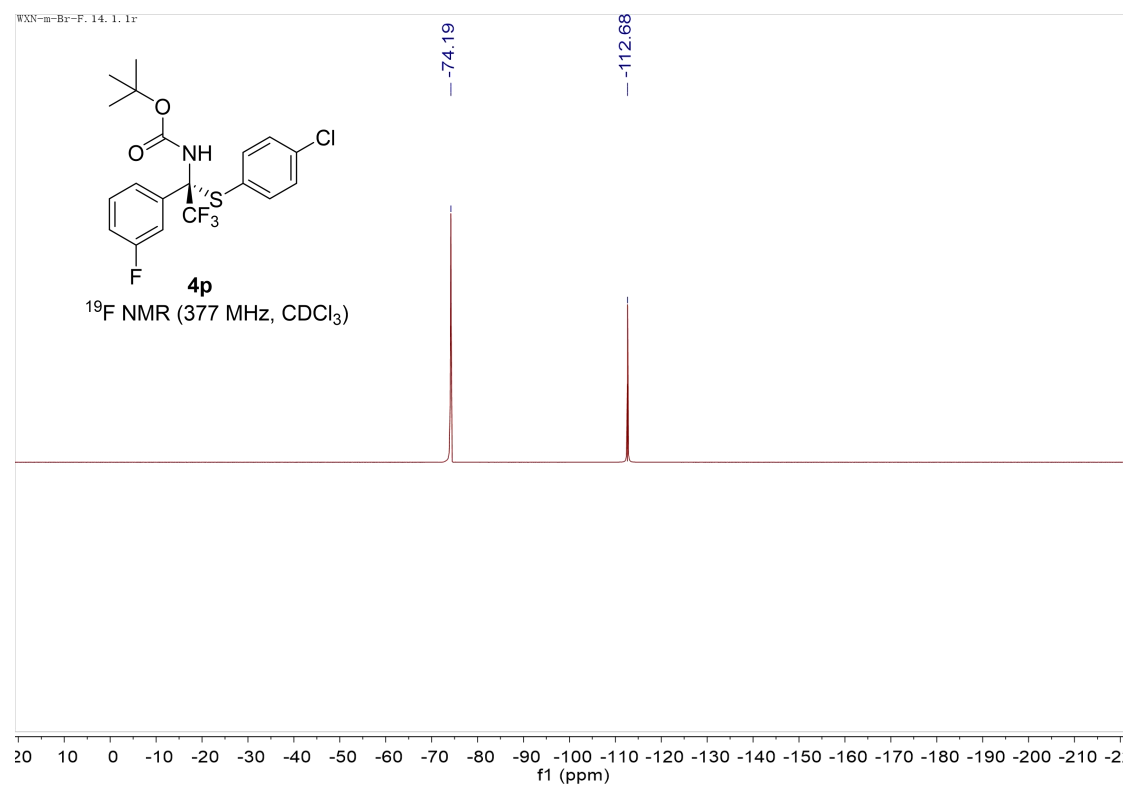

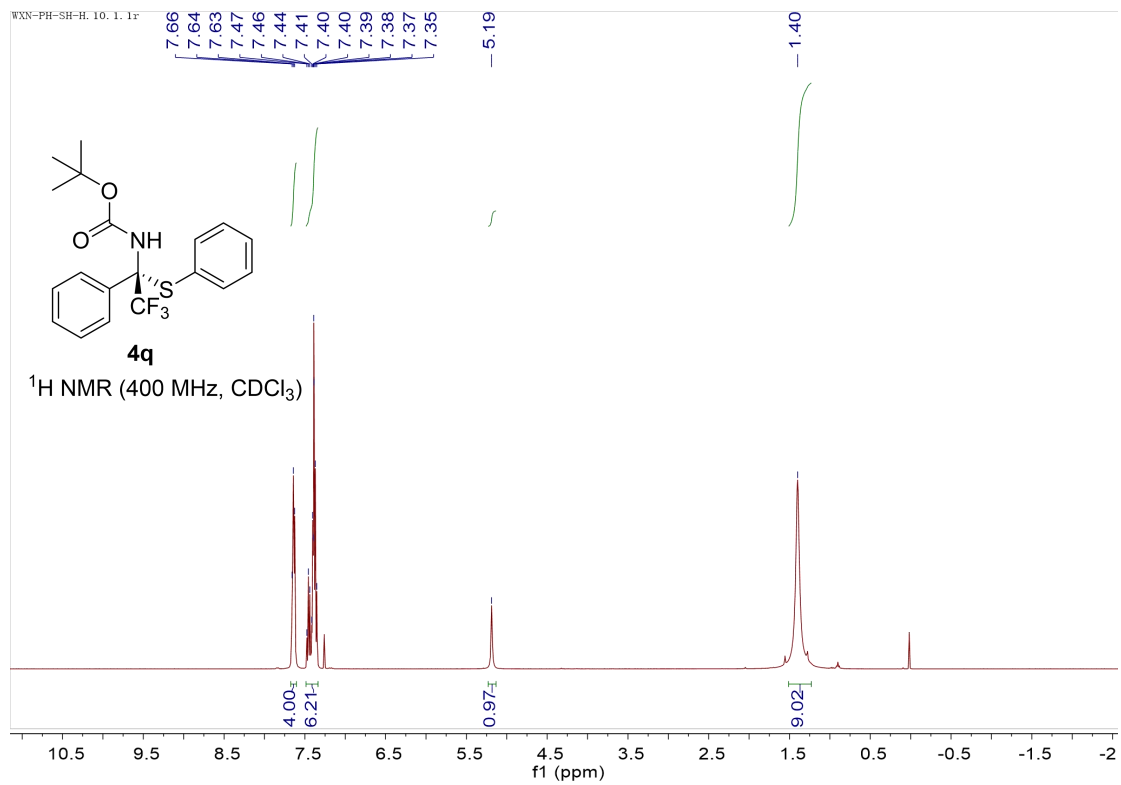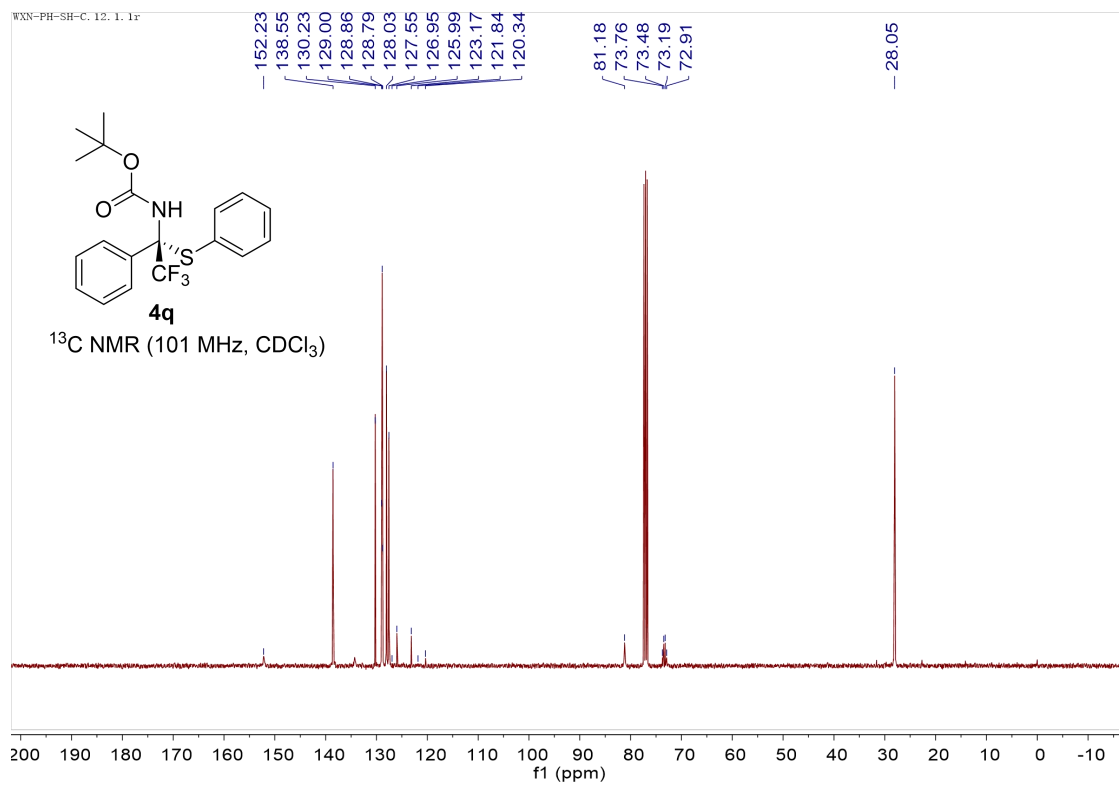

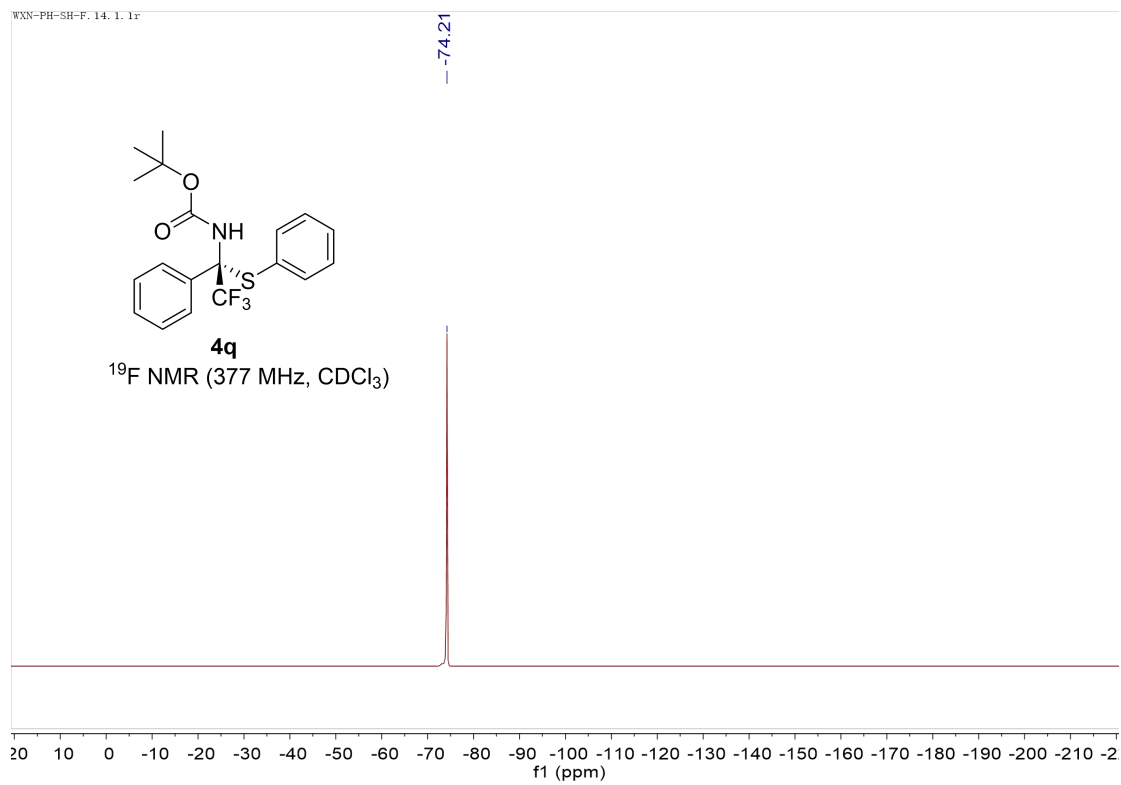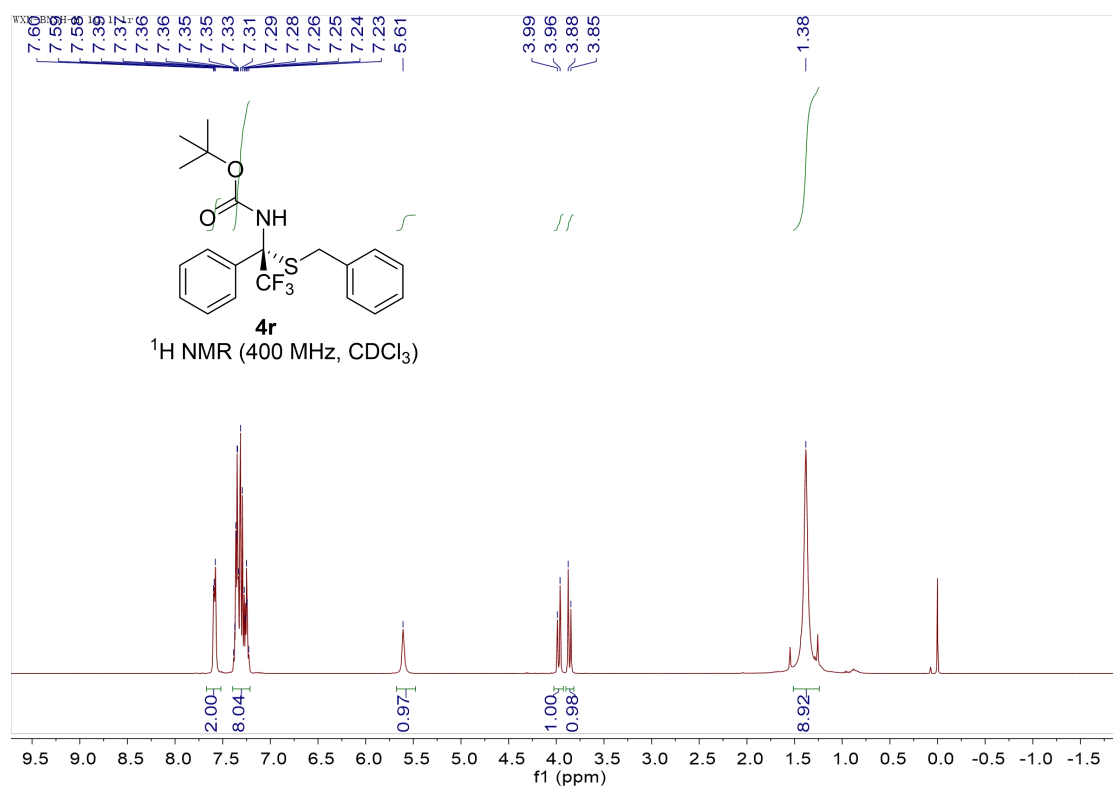

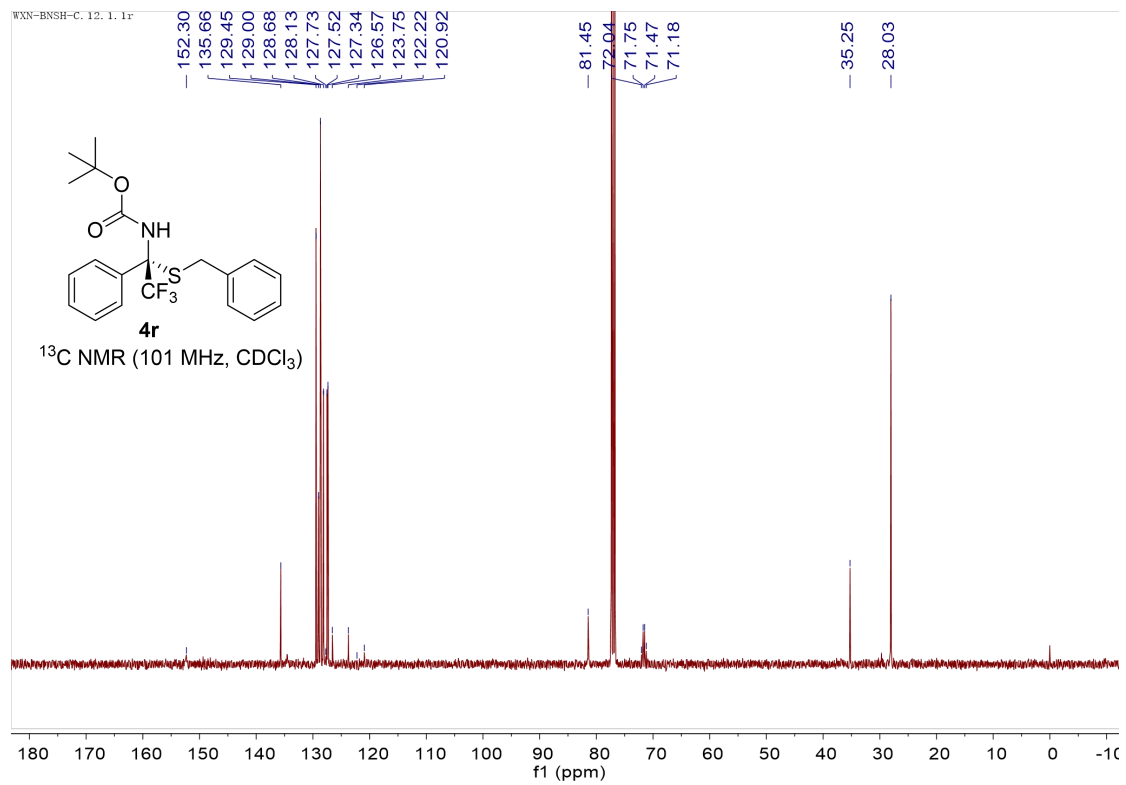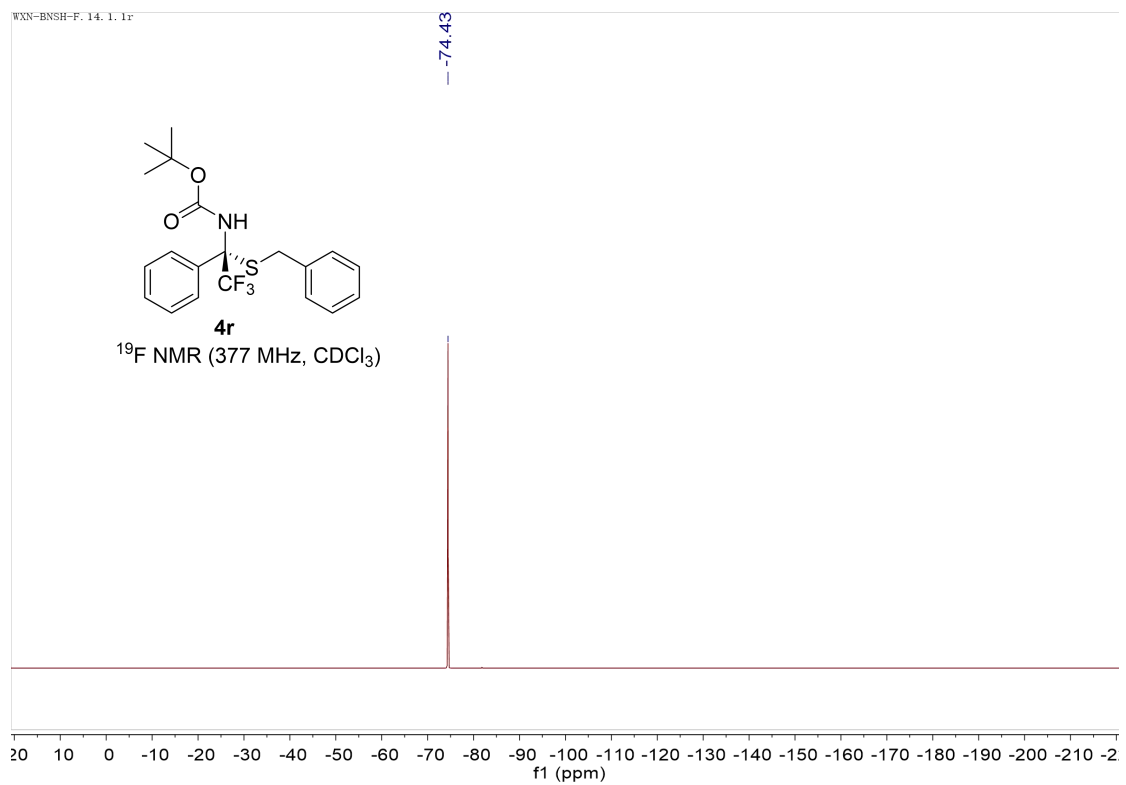

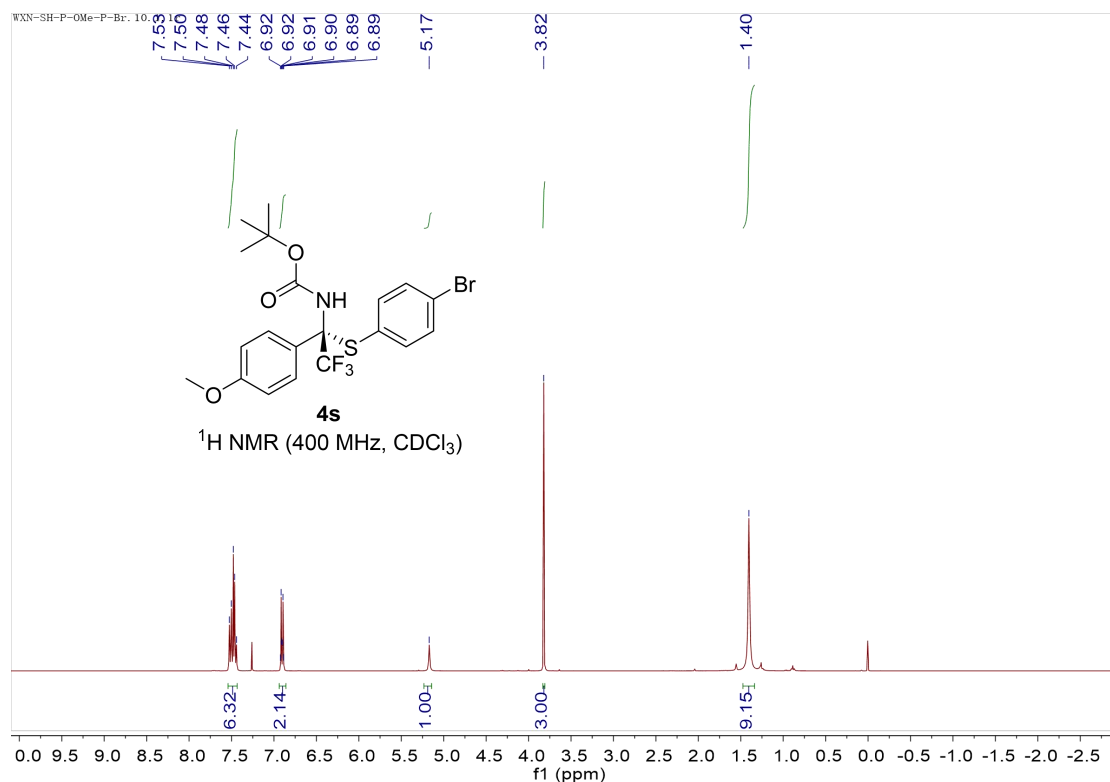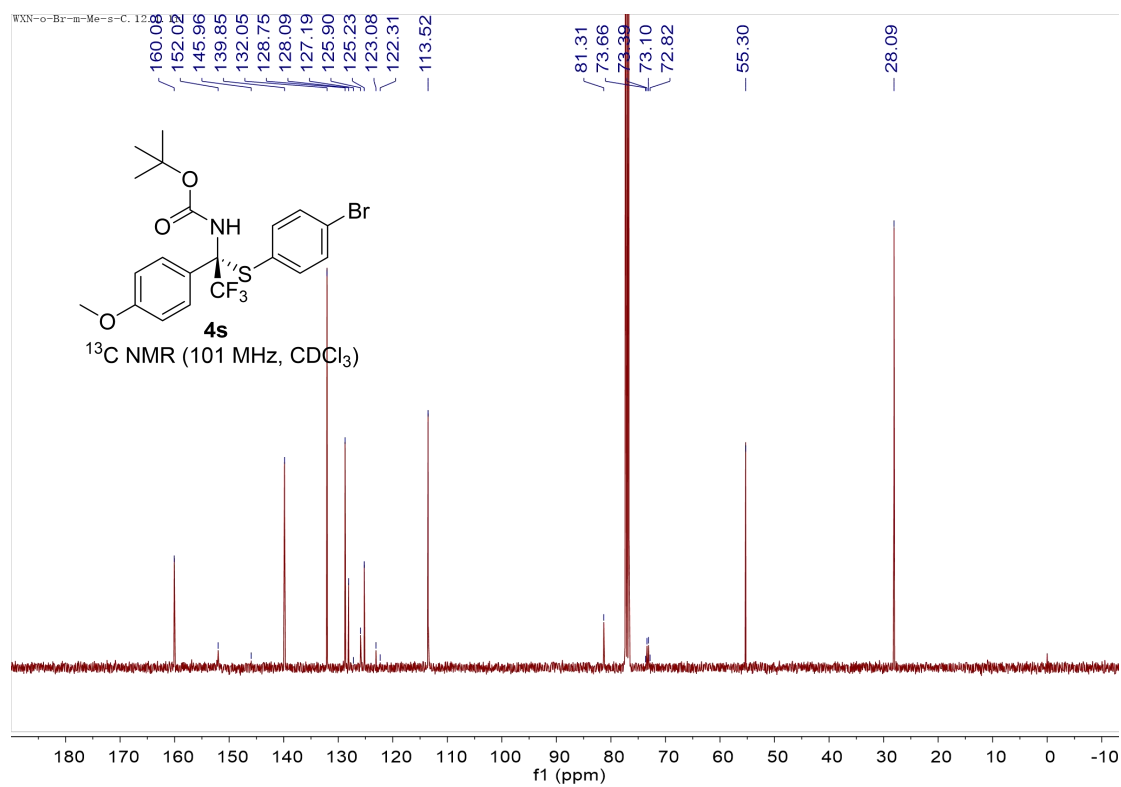



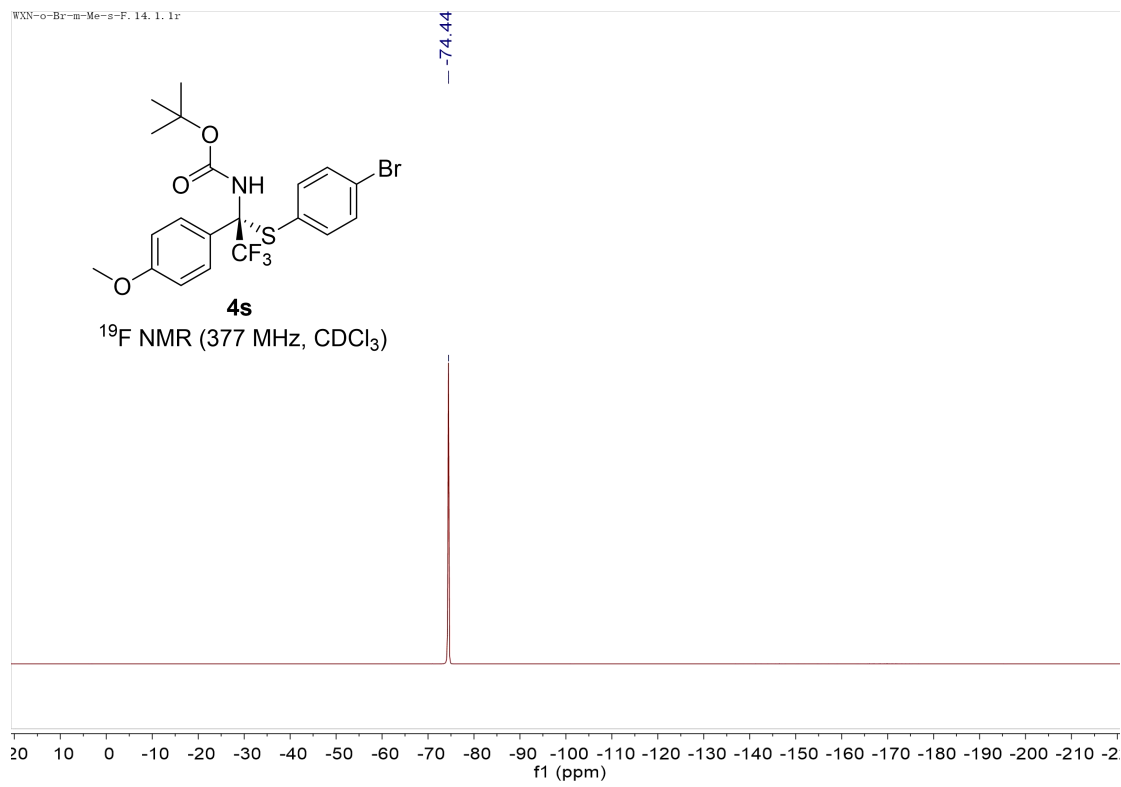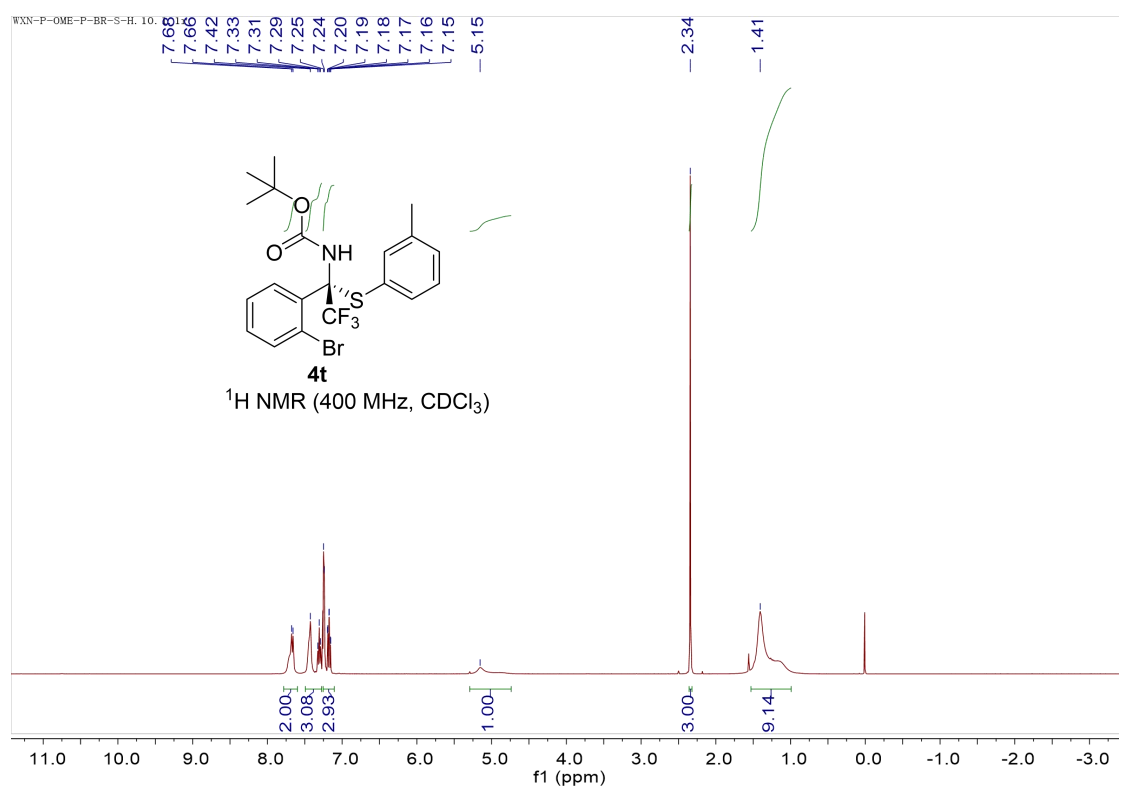

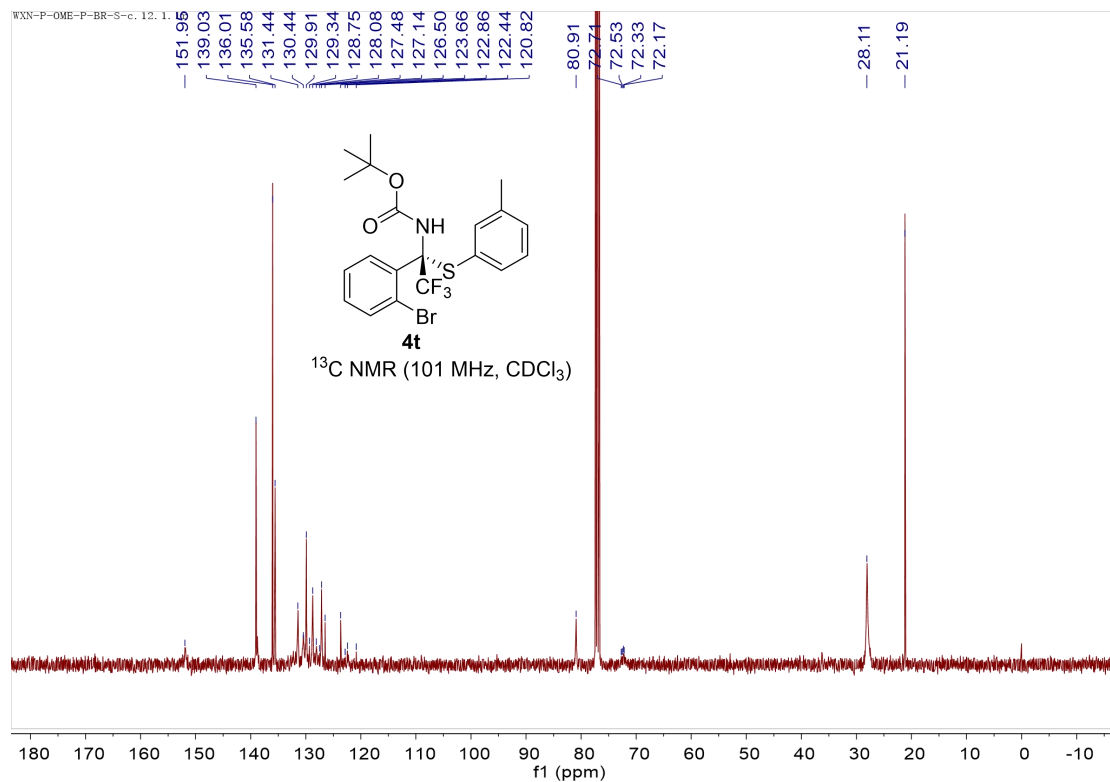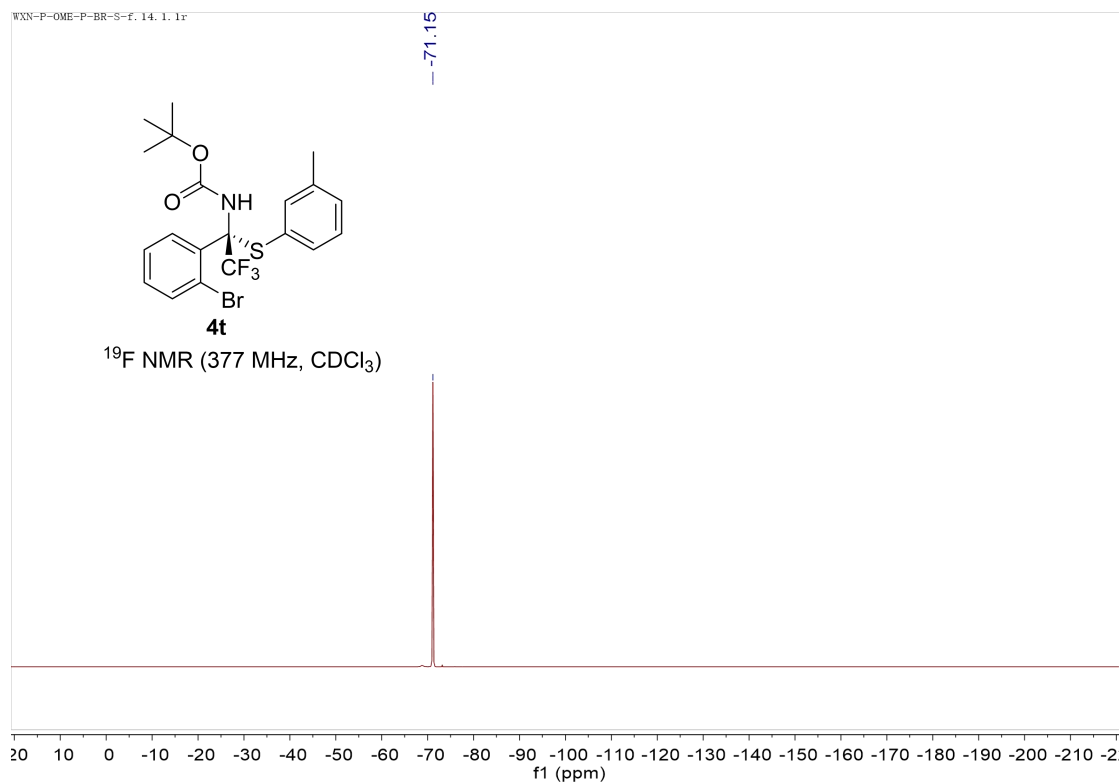

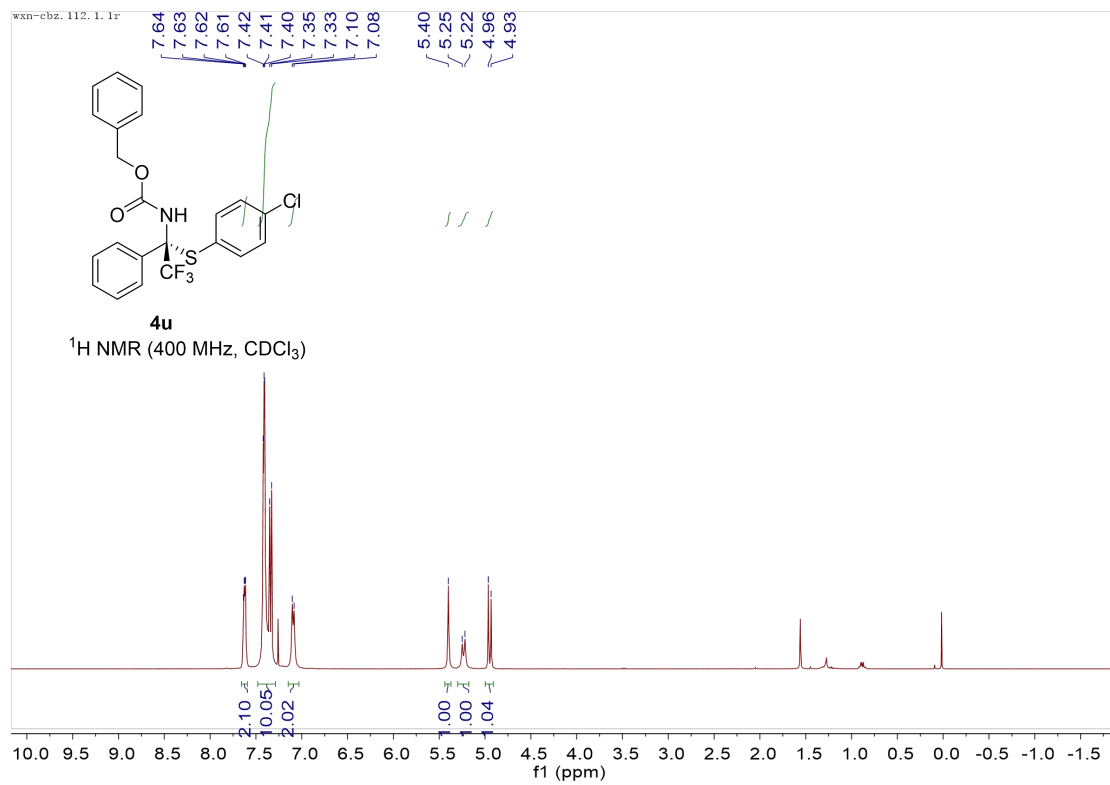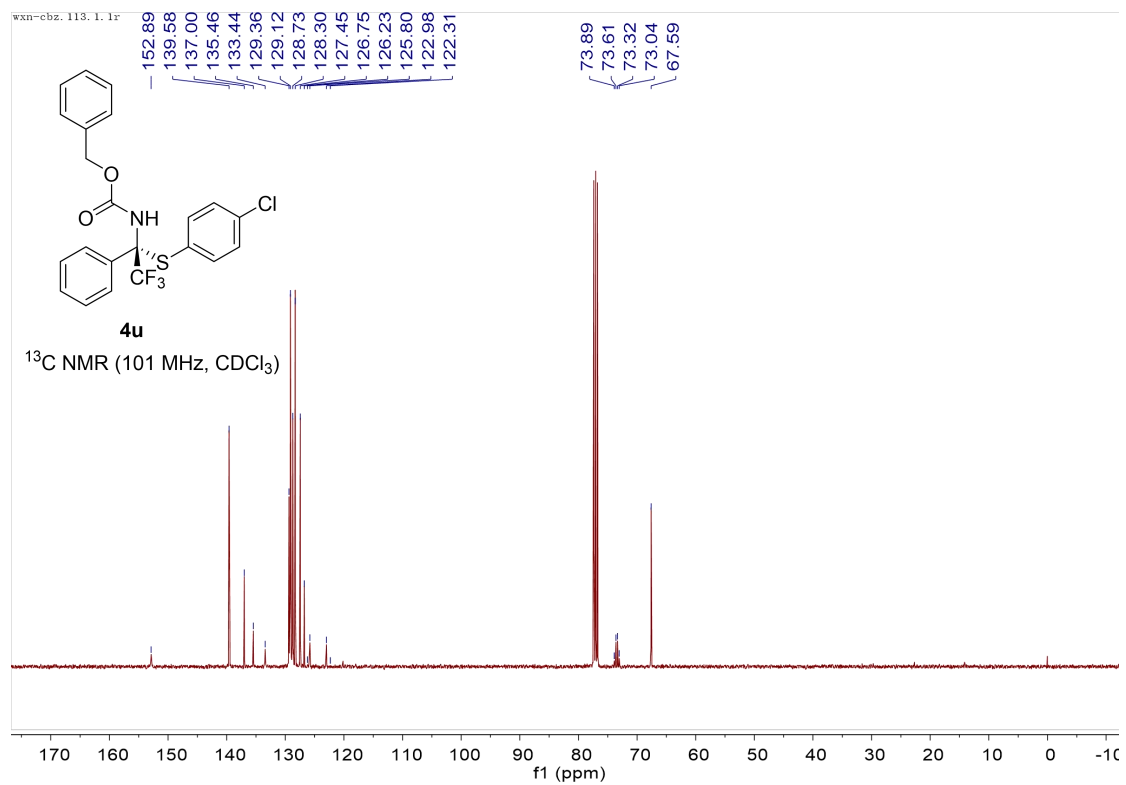

wxn-cbz. 114. 1. 1r

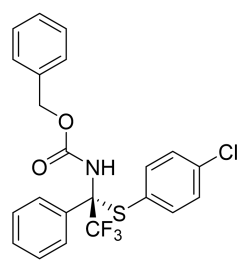

**4u**

<sup>19</sup>F NMR (377 MHz, CDCl<sub>3</sub>)

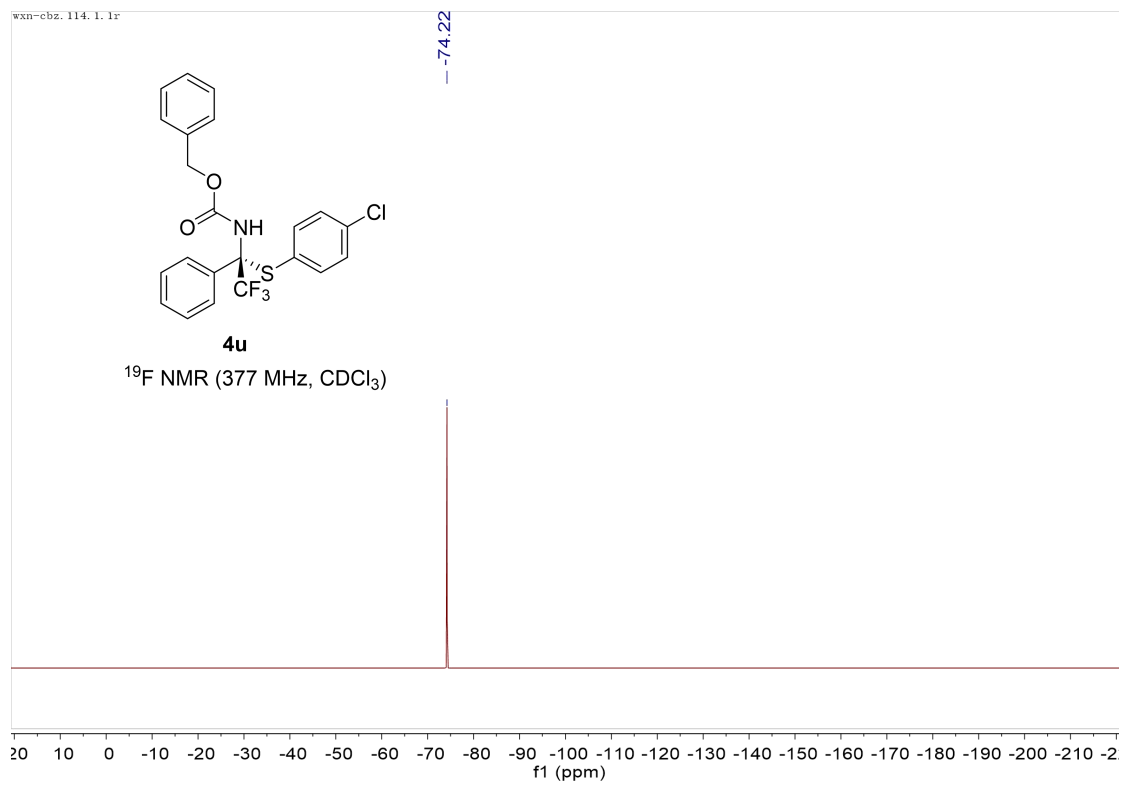

### 10. HPLC traces of compounds 4a-4u.

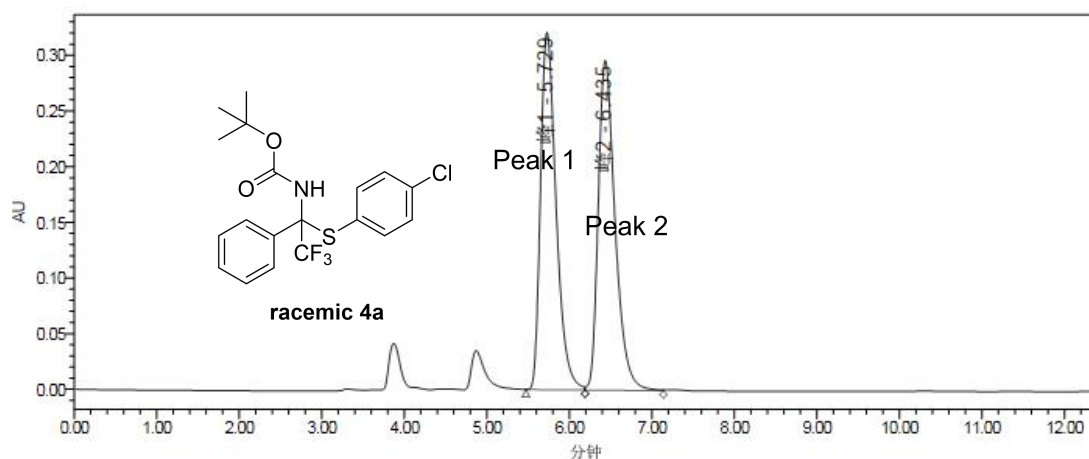

|   | Channel Description | Peak Name    | RT (min) | Area (AU*sec) | % Area | Height (AU) |
|---|---------------------|--------------|----------|---------------|--------|-------------|
| 1 | W2489 ChA 254nm     | 峰1<br>Peak 1 | 5.729    | 4197789       | 49.95  | 320667      |
| 2 | W2489 ChA 254nm     | 峰2<br>Peak 2 | 6.435    | 4205570       | 50.05  | 295891      |

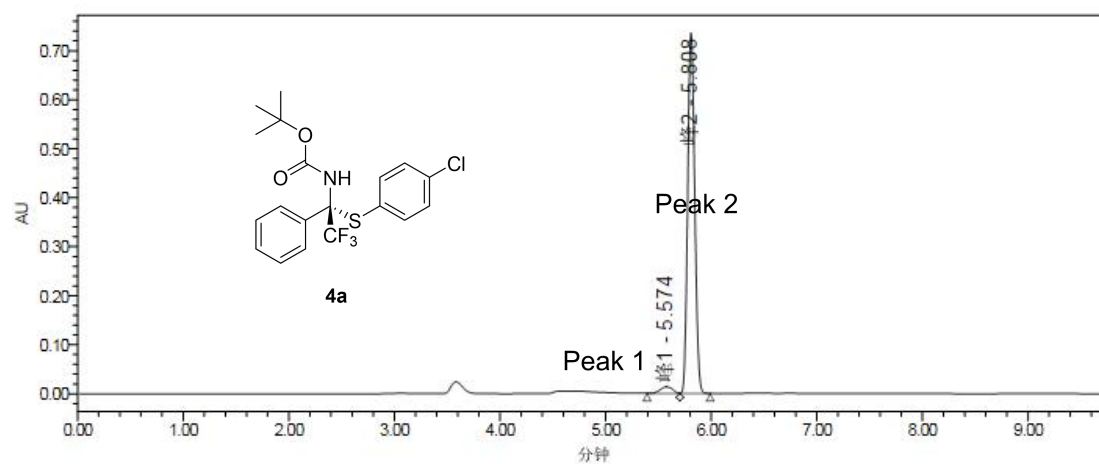

|   | Channel Description | Peak Name    | RT (min) | Area (AU*sec) | % Area | Height (AU) |
|---|---------------------|--------------|----------|---------------|--------|-------------|
| 1 | W2489 ChA 254nm     | 峰1<br>Peak 1 | 5.574    | 107627        | 3.07   | 13281       |
| 2 | W2489 ChA 254nm     | 峰2<br>Peak 2 | 5.808    | 3402806       | 96.93  | 735666      |

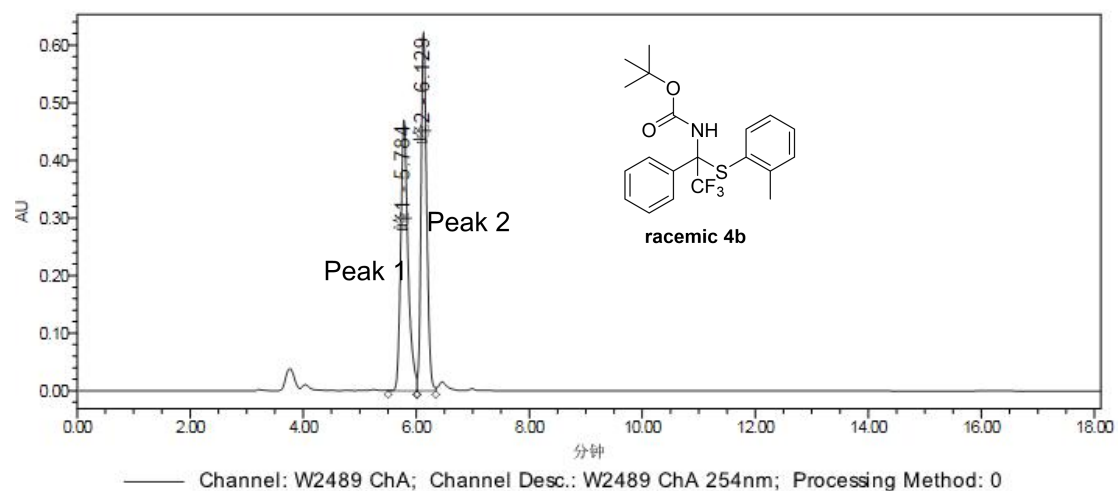

|   | Channel Description | Peak Name    | RT (min) | Area (AU*sec) | % Area | Height (AU) |
|---|---------------------|--------------|----------|---------------|--------|-------------|
| 1 | W2489 ChA 254nm     | 峰1<br>Peak 1 | 5.784    | 4217705       | 49.60  | 469375      |
| 2 | W2489 ChA 254nm     | 峰2<br>Peak 2 | 6.129    | 4285422       | 50.40  | 622072      |

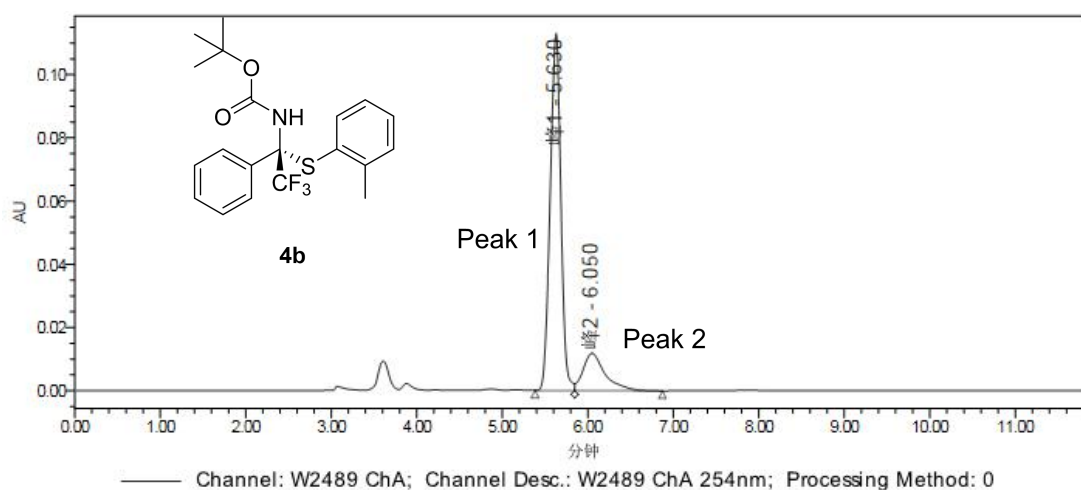

|   | Channel Description | Peak Name    | RT (min) | Area (AU*sec) | % Area | Height (AU) |
|---|---------------------|--------------|----------|---------------|--------|-------------|
| 1 | W2489 ChA 254nm     | 峰1<br>Peak 1 | 5.630    | 977015        | 82.25  | 112855      |
| 2 | W2489 ChA 254nm     | 峰2<br>Peak 2 | 6.050    | 210803        | 17.75  | 11786       |

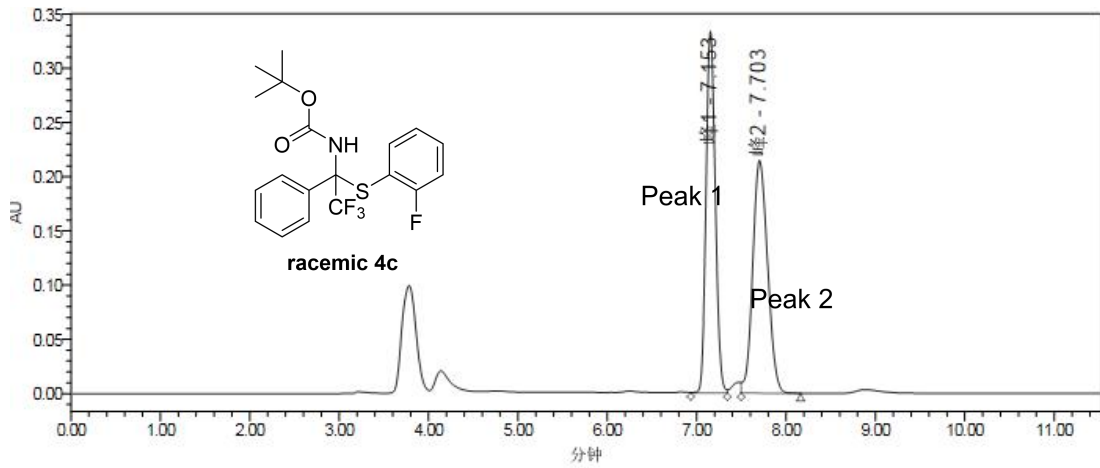

| Peak Name    | Channel Description | RT (min) | Area (峰*sec)<br>μAU*sec | % Area | Height (峰)<br>μAU |
|--------------|---------------------|----------|-------------------------|--------|-------------------|
| 峰1<br>Peak 1 | W2489 ChA 254nm     | 7.153    | 2379754                 | 48.96  | 332959            |
| 峰2<br>Peak 2 | W2489 ChA 254nm     | 7.703    | 2480669                 | 51.04  | 214222            |

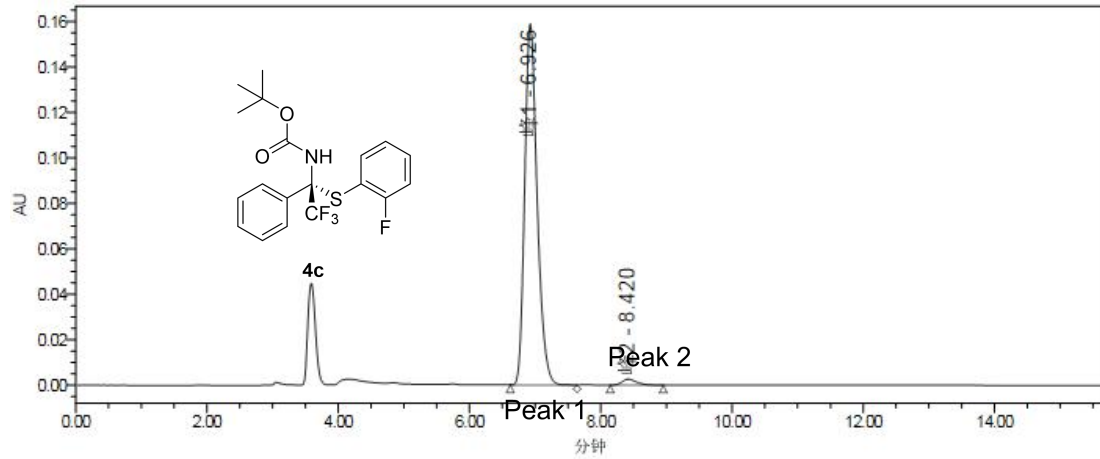

| Peak Name    | Channel Description | RT (min) | Area (峰*sec)<br>μAU*sec | % Area | Height (峰)<br>μAU |
|--------------|---------------------|----------|-------------------------|--------|-------------------|
| 峰1<br>Peak 1 | W2489 ChA 254nm     | 6.926    | 2084711                 | 98.09  | 158646            |
| 峰2<br>Peak 2 | W2489 ChA 254nm     | 8.420    | 40675                   | 1.91   | 2661              |

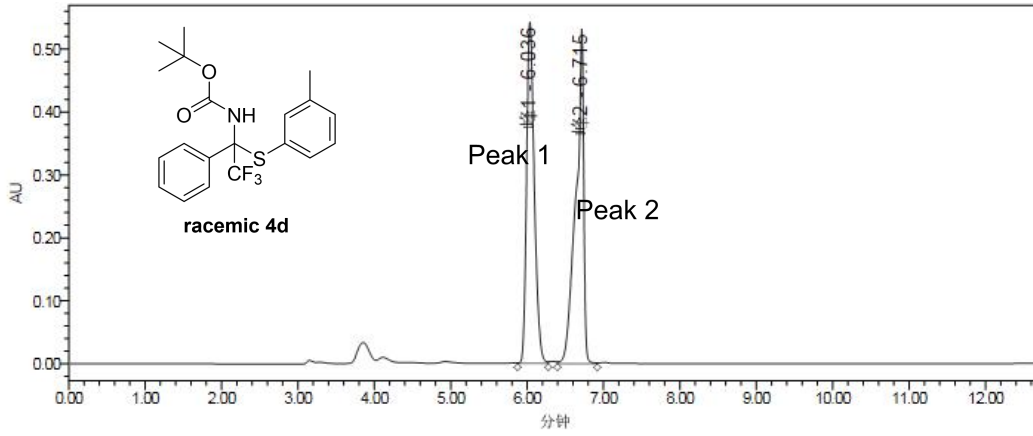

Channel: W2489 ChA; Channel Desc.: W2489 ChA 254nm; Processing Method: 0

|   | Channel Description | Peak Name | RT (min) | Area (AU*sec) | % Area | Height (AU) |
|---|---------------------|-----------|----------|---------------|--------|-------------|
| 1 | W2489 ChA 254nm     | 峰1        | 6.036    | 3814919       | 50.10  | 542049      |
| 2 | W2489 ChA 254nm     | 峰2        | 6.715    | 3799479       | 49.90  | 531784      |

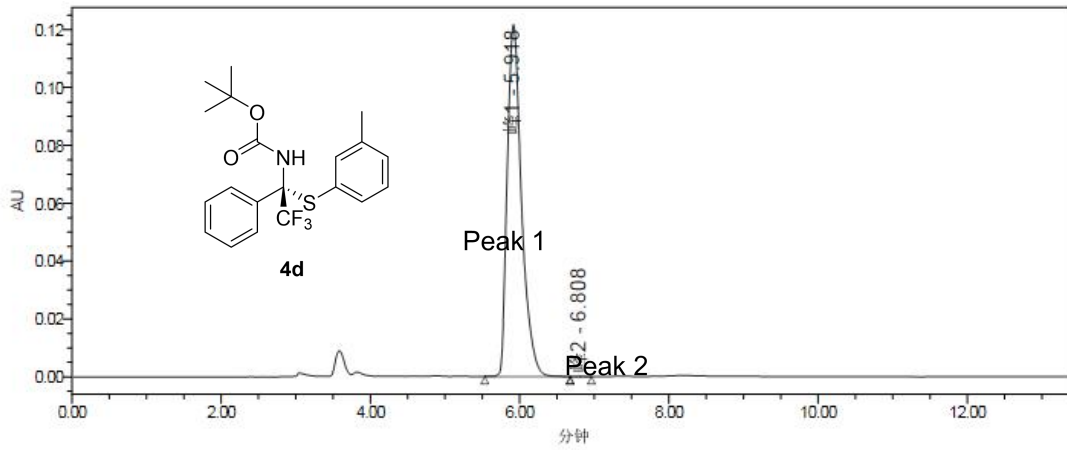

Channel: W2489 ChA; Channel Desc.: W2489 ChA 254nm; Processing Method: 0

|   | Channel Description | Peak Name | RT (min) | Area (AU*sec) | % Area | Height (AU) |
|---|---------------------|-----------|----------|---------------|--------|-------------|
| 1 | W2489 ChA 254nm     | 峰1        | 5.918    | 1617939       | 99.98  | 121483      |
| 2 | W2489 ChA 254nm     | 峰2        | 6.808    | 280           | 0.02   | 33          |



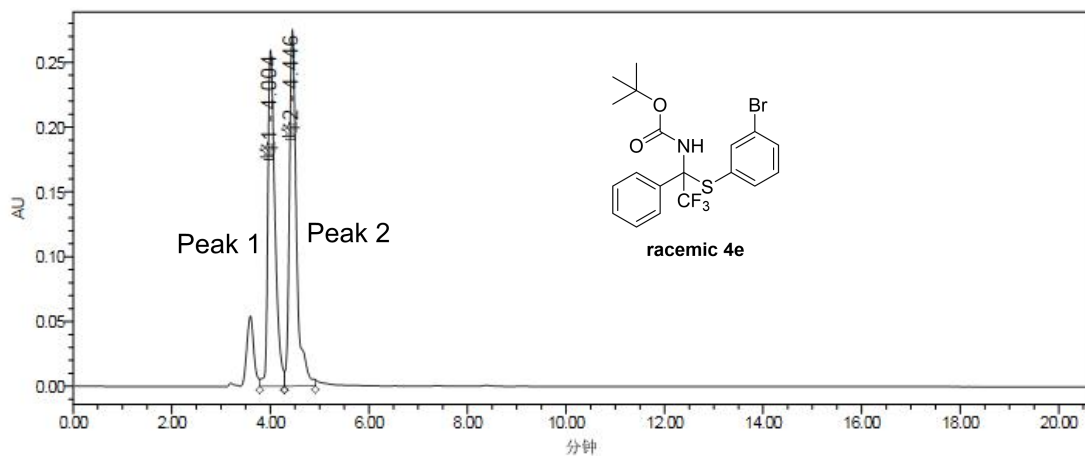

Channel: W2489 ChA; Channel Desc.: W2489 ChA 254nm; Processing Method: 0

|   | Channel Description | Peak Name    | RT (min) | Area (峰*sec) | % Area | Height (峰) |
|---|---------------------|--------------|----------|--------------|--------|------------|
| 1 | W2489 ChA 254nm     | 峰1<br>Peak 1 | 4.004    | 2589352      | 48.74  | 259267     |
| 2 | W2489 ChA 254nm     | 峰2<br>Peak 2 | 4.446    | 2722840      | 51.26  | 274741     |

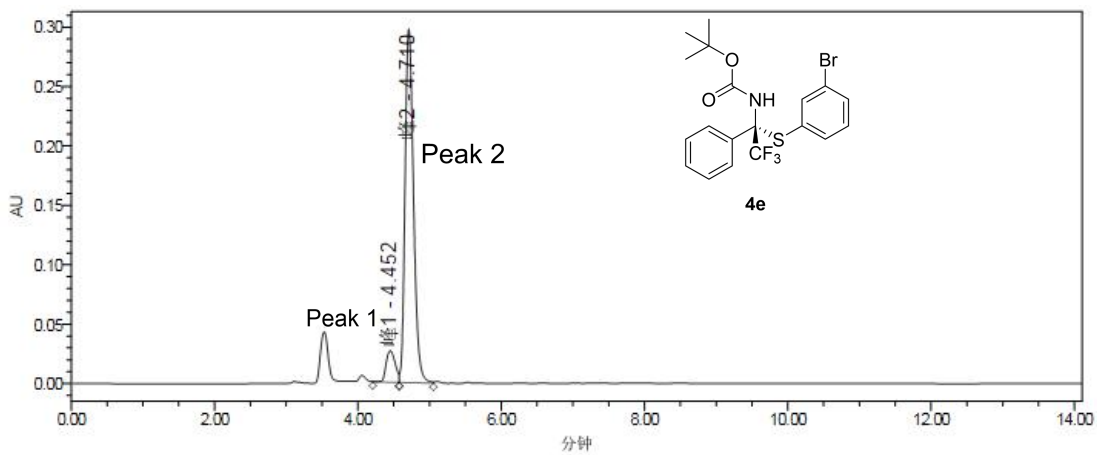

Channel: W2489 ChA; Channel Desc.: W2489 ChA 254nm; Processing Method: 0

|   | Channel Description | Peak Name    | RT (min) | Area (峰*sec) | % Area | Height (峰) |
|---|---------------------|--------------|----------|--------------|--------|------------|
| 1 | W2489 ChA 254nm     | 峰1<br>Peak 1 | 4.452    | 233907       | 8.75   | 26254      |
| 2 | W2489 ChA 254nm     | 峰2<br>Peak 2 | 4.710    | 2439108      | 91.25  | 297386     |

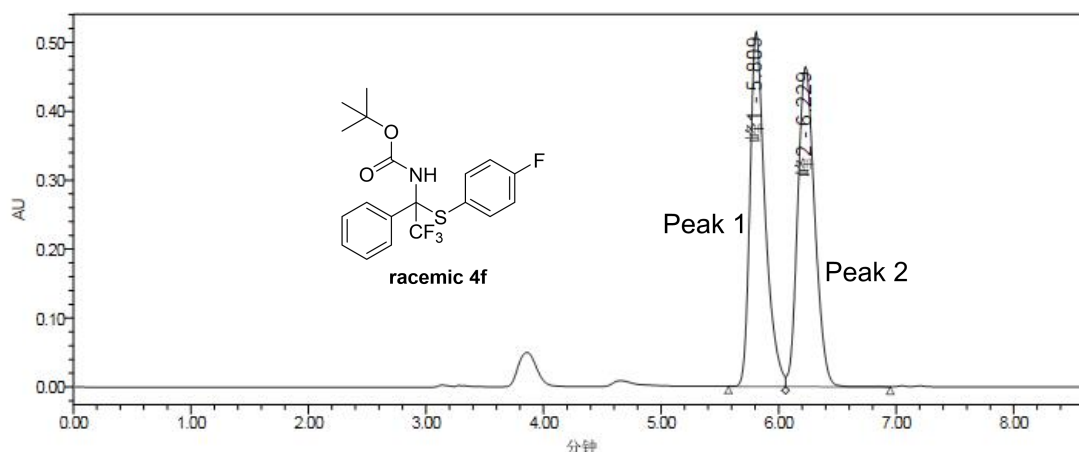

|   | Channel Description | Peak Name | RT (min) | Area (峰*sec)<br>μAU*sec | % Area | Height (峰)<br>μAU |
|---|---------------------|-----------|----------|-------------------------|--------|-------------------|
| 1 | W2489 ChA 254nm     | 峰1        | 5.809    | 4596247                 | 49.54  | 514255            |
| 2 | W2489 ChA 254nm     | 峰2        | 6.229    | 4682057                 | 50.46  | 464198            |

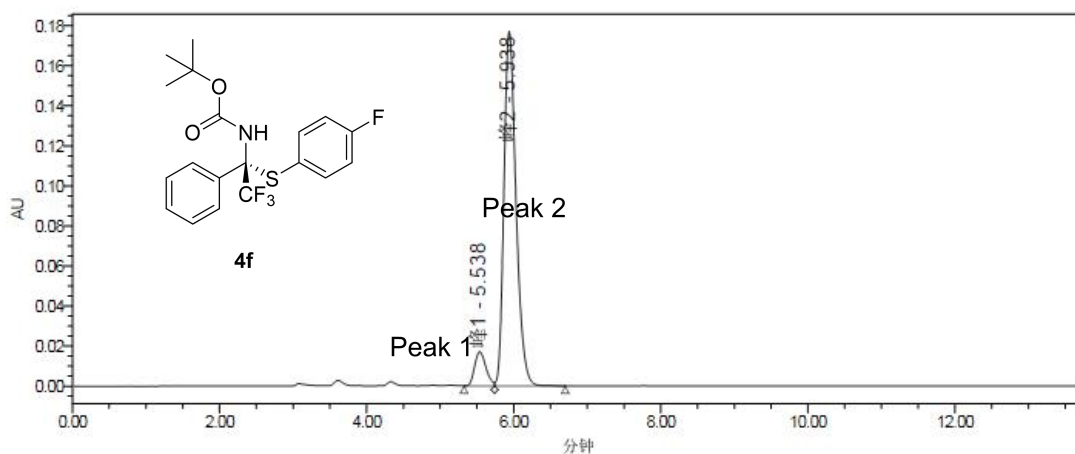

|   | Channel Description | Peak Name | RT (min) | Area (峰*sec)<br>μAU*sec | % Area | Height (峰)<br>μAU |
|---|---------------------|-----------|----------|-------------------------|--------|-------------------|
| 1 | W2489 ChA 254nm     | 峰1        | 5.538    | 181489                  | 8.26   | 16976             |
| 2 | W2489 ChA 254nm     | 峰2        | 5.938    | 2015624                 | 91.74  | 176867            |

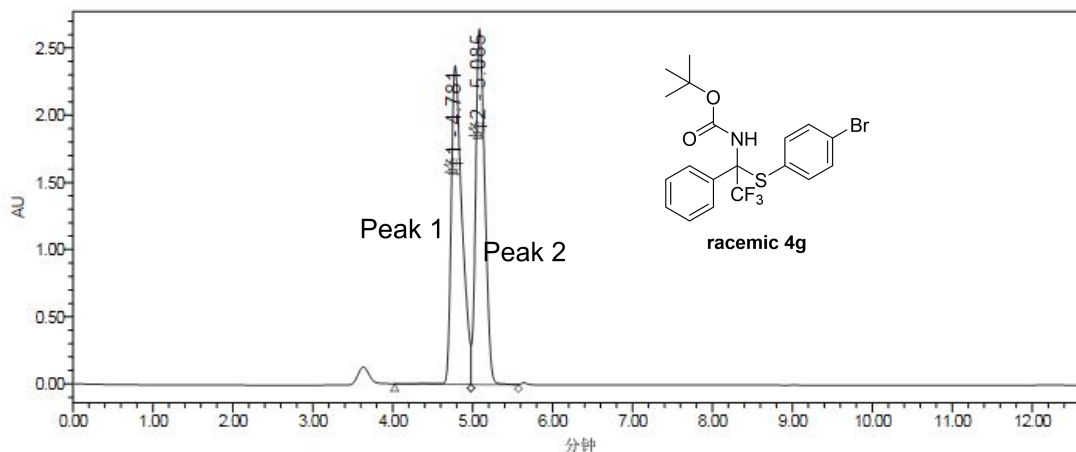

Channel: W2489 ChA; Channel Desc.: W2489 ChA 254nm; Processing Method: 0

|   | Channel Description | Peak Name | RT (min) | Area (AU*sec) | % Area | Height (AU) |
|---|---------------------|-----------|----------|---------------|--------|-------------|
| 1 | W2489 ChA 254nm     | 峰1        | 4.781    | 22139983      | 51.25  | 2371254     |
| 2 | W2489 ChA 254nm     | 峰2        | 5.085    | 21059606      | 48.75  | 2644359     |

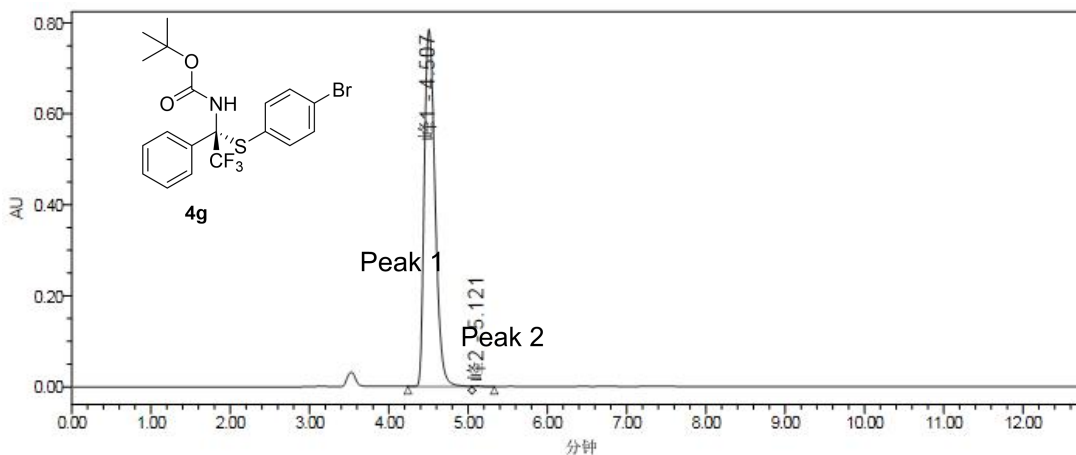

Channel: W2489 ChA; Channel Desc.: W2489 ChA 254nm; Processing Method: 0

|   | Channel Description | Peak Name | RT (min) | Area (AU*sec) | % Area | Height (AU) |
|---|---------------------|-----------|----------|---------------|--------|-------------|
| 1 | W2489 ChA 254nm     | 峰1        | 4.507    | 7411260       | 99.86  | 784443      |
| 2 | W2489 ChA 254nm     | 峰2        | 5.121    | 10608         | 0.14   | 1675        |

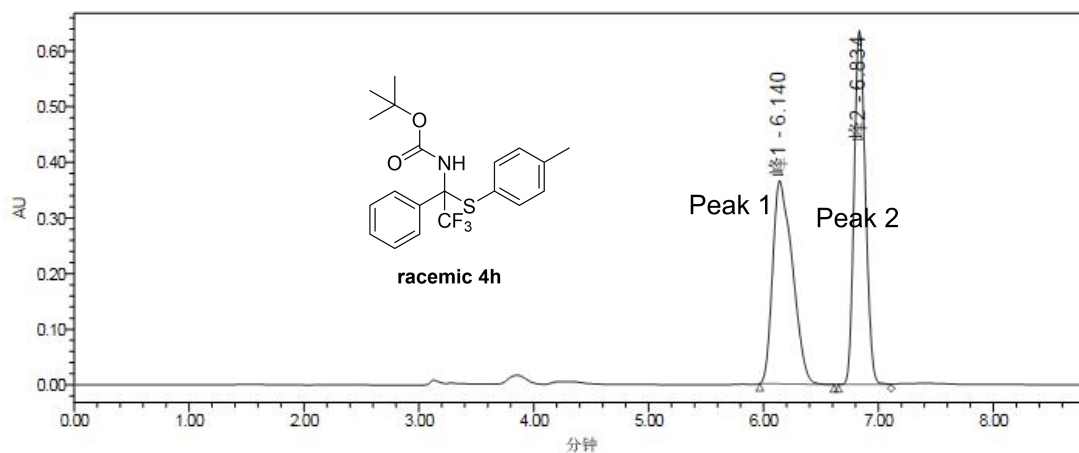

Channel: W2489 ChA; Channel Desc.: W2489 ChA 254nm; Processing Method: 0

|   | Channel Description | Peak Name | RT (min) | Area (μAU*sec) | % Area | Height (μAU) |
|---|---------------------|-----------|----------|----------------|--------|--------------|
| 1 | W2489 ChA 254nm     | 峰1        | 6.140    | 4372475        | 50.14  | 365040       |
| 2 | W2489 ChA 254nm     | 峰2        | 6.834    | 4347900        | 49.86  | 635595       |

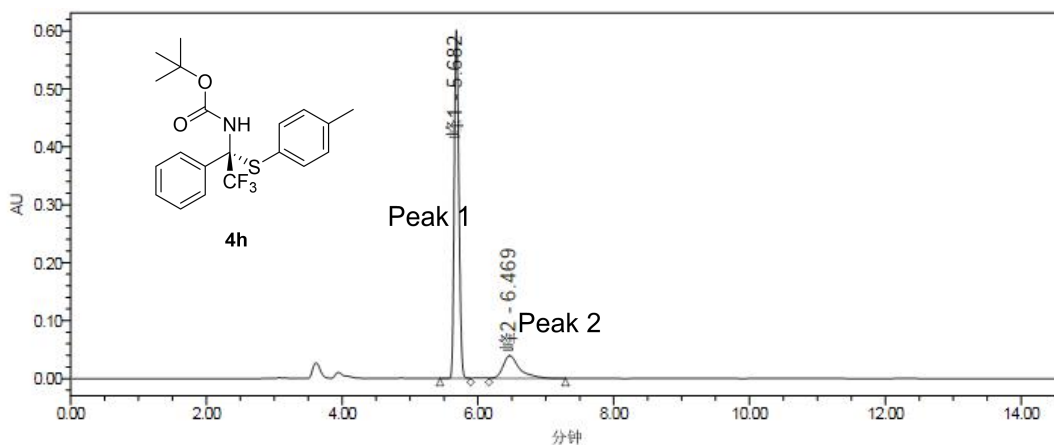

Channel: W2489 ChA; Channel Desc.: W2489 ChA 254nm; Processing Method: 0

|   | Channel Description | Peak Name | RT (min) | Area (μAU*sec) | % Area | Height (μAU) |
|---|---------------------|-----------|----------|----------------|--------|--------------|
| 1 | W2489 ChA 254nm     | 峰1        | 5.682    | 2648642        | 80.98  | 601392       |
| 2 | W2489 ChA 254nm     | 峰2        | 6.469    | 669094         | 19.02  | 39397        |

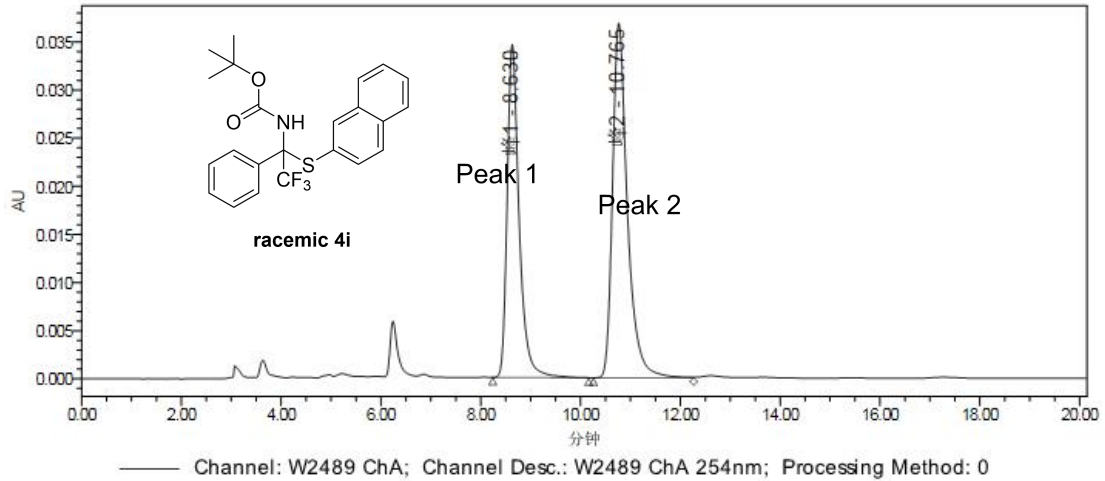

| Channel Description | Peak Name | RT (min) | Area (AU*sec) | % Area | Height (AU) |
|---------------------|-----------|----------|---------------|--------|-------------|
| 1 W2489 ChA 254nm   | 峰1        | 8.630    | 576901        | 43.14  | 34571       |
| 2 W2489 ChA 254nm   | 峰2        | 10.765   | 760334        | 56.86  | 36811       |

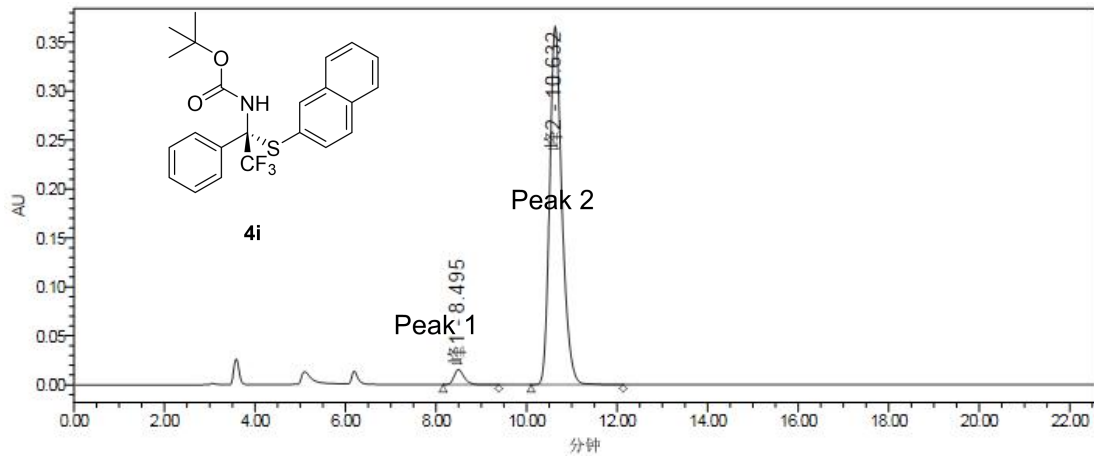

| Channel Description | Peak Name | RT (min) | Area (AU*sec) | % Area | Height (AU) |
|---------------------|-----------|----------|---------------|--------|-------------|
| 1 W2489 ChA 254nm   | 峰1        | 8.495    | 239187        | 3.35   | 15420       |
| 2 W2489 ChA 254nm   | 峰2        | 10.632   | 6905248       | 96.65  | 365796      |

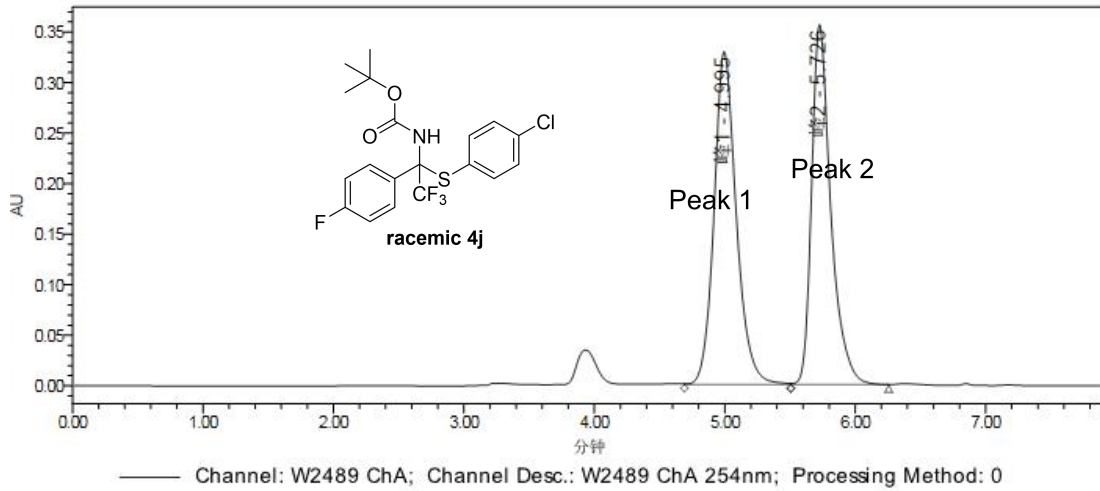

|   | Channel Description | Peak Name | RT (min) | Area (AU*sec) | % Area | Height (AU) |
|---|---------------------|-----------|----------|---------------|--------|-------------|
| 1 | W2489 ChA 254nm     | Peak 1    | 4.995    | 3904418       | 51.76  | 328950      |
| 2 | W2489 ChA 254nm     | Peak 2    | 5.726    | 3638880       | 48.24  | 355774      |

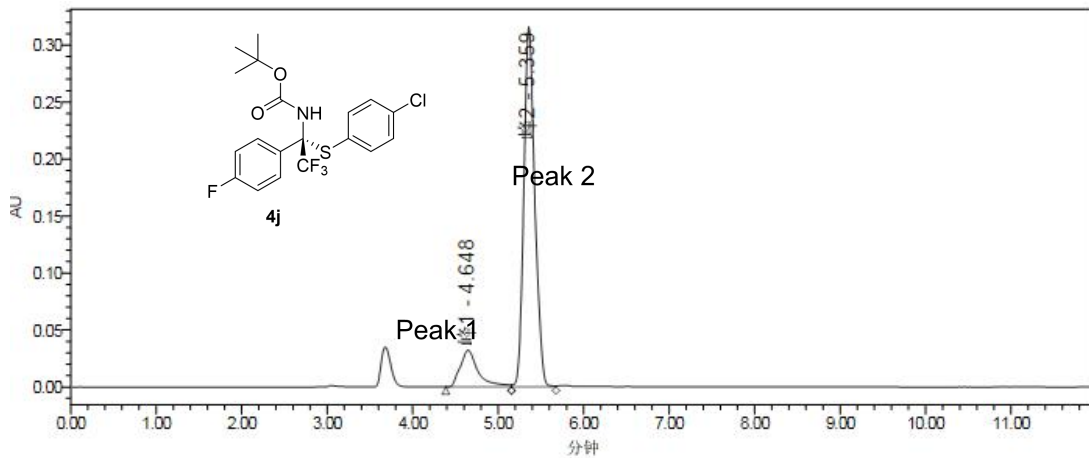

|   | Channel Description | Peak Name | RT (min) | Area (AU*sec) | % Area | Height (AU) |
|---|---------------------|-----------|----------|---------------|--------|-------------|
| 1 | W2489 ChA 254nm     | 峰1        | 4.648    | 465695        | 14.22  | 32053       |
| 2 | W2489 ChA 254nm     | 峰2        | 5.359    | 2809119       | 85.78  | 315489      |

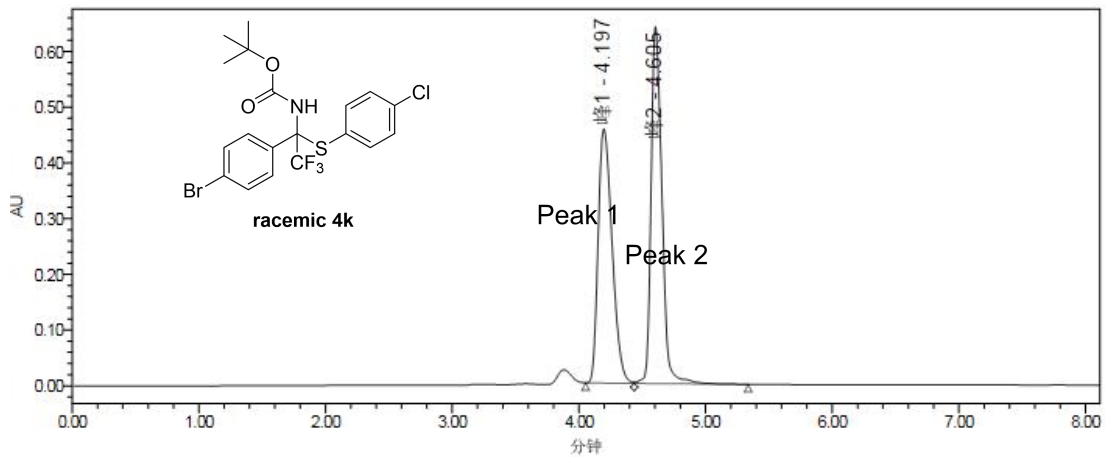

Channel: W2489 ChA; Channel Desc.: W2489 ChA 254nm; Processing Method: 0

|   | Channel Description | Peak Name | RT (min) | Area (AU*sec) | % Area | Height (AU) |
|---|---------------------|-----------|----------|---------------|--------|-------------|
| 1 | W2489 ChA 254nm     | 峰1        | 4.197    | 3485760       | 47.93  | 455844      |
| 2 | W2489 ChA 254nm     | 峰2        | 4.605    | 3786682       | 52.07  | 639957      |

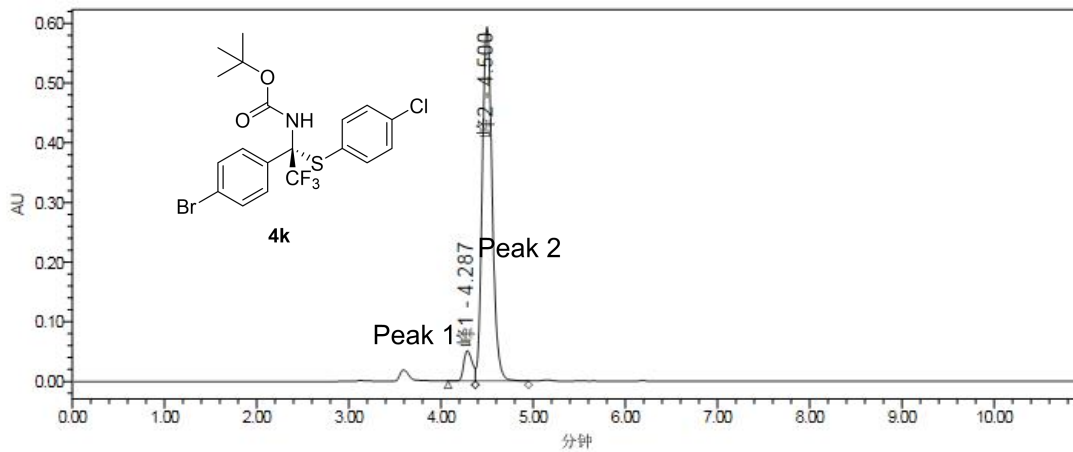

Channel: W2489 ChA; Channel Desc.: W2489 ChA 254nm; Processing Method: 0

|   | Channel Description | Peak Name | RT (min) | Area (AU*sec) | % Area | Height (AU) |
|---|---------------------|-----------|----------|---------------|--------|-------------|
| 1 | W2489 ChA 254nm     | 峰1        | 4.287    | 322638        | 6.75   | 50474       |
| 2 | W2489 ChA 254nm     | 峰2        | 4.500    | 4454457       | 93.25  | 592710      |

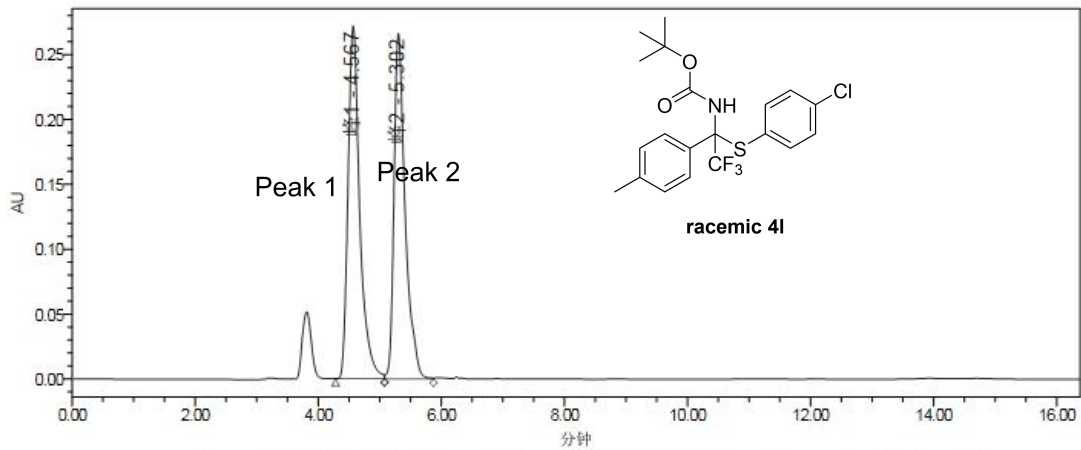

Channel: W2489 ChA; Channel Desc.: W2489 ChA 254nm; Processing Method: 0

|   | Channel Description | Peak Name | RT (min) | Area (峰*sec)<br>μAU*sec | % Area | Height (峰)<br>μAU |
|---|---------------------|-----------|----------|-------------------------|--------|-------------------|
| 1 | W2489 ChA 254nm     | 峰1        | 4.567    | 3591173                 | 51.71  | 271558            |
| 2 | W2489 ChA 254nm     | 峰2        | 5.302    | 3353624                 | 48.29  | 265898            |

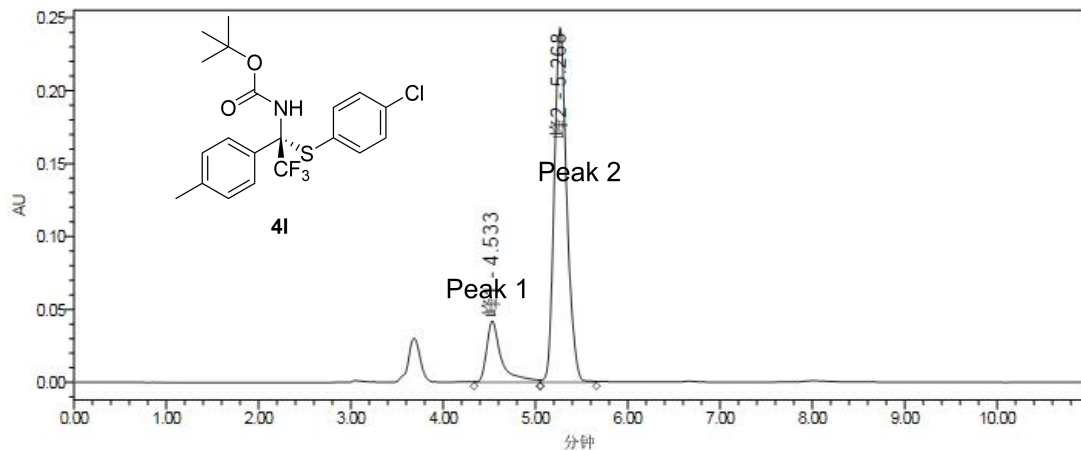

Channel: W2489 ChA; Channel Desc.: W2489 ChA 254nm; Processing Method: 0

|   | Channel Description | Peak Name | RT (min) | Area (峰*sec)<br>μAU*sec | % Area | Height (峰)<br>μAU |
|---|---------------------|-----------|----------|-------------------------|--------|-------------------|
| 1 | W2489 ChA 254nm     | 峰1        | 4.533    | 470268                  | 16.98  | 41851             |
| 2 | W2489 ChA 254nm     | 峰2        | 5.268    | 2299870                 | 83.02  | 242946            |



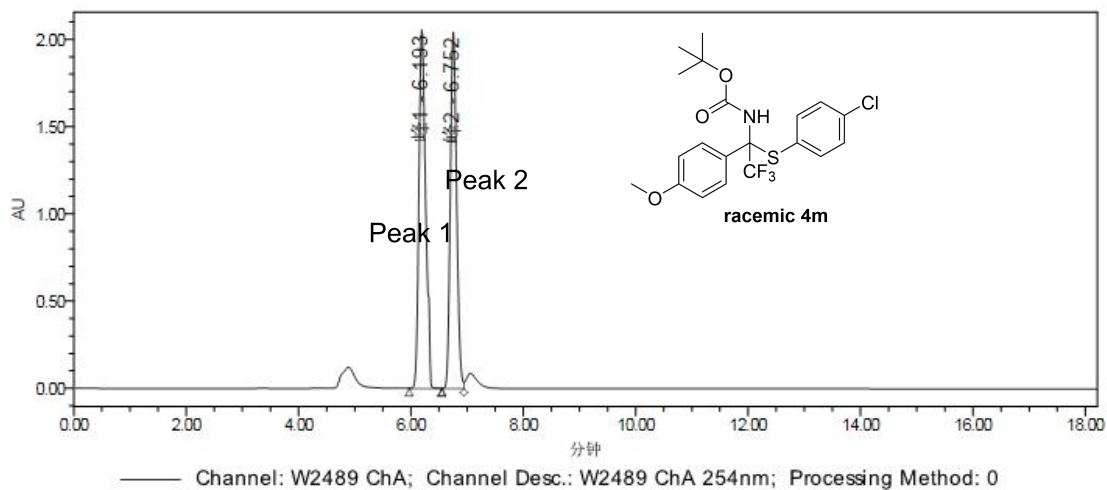

|   | Channel Description | Peak Name    | RT (min) | Area (峰*sec)<br>μAU*sec | % Area | Height (峰)<br>μAU |
|---|---------------------|--------------|----------|-------------------------|--------|-------------------|
| 1 | W2489 ChA 254nm     | 峰1<br>Peak 1 | 6.193    | 17127554                | 51.88  | 2053448           |
| 2 | W2489 ChA 254nm     | 峰2<br>Peak 2 | 6.752    | 15885436                | 48.12  | 2041806           |

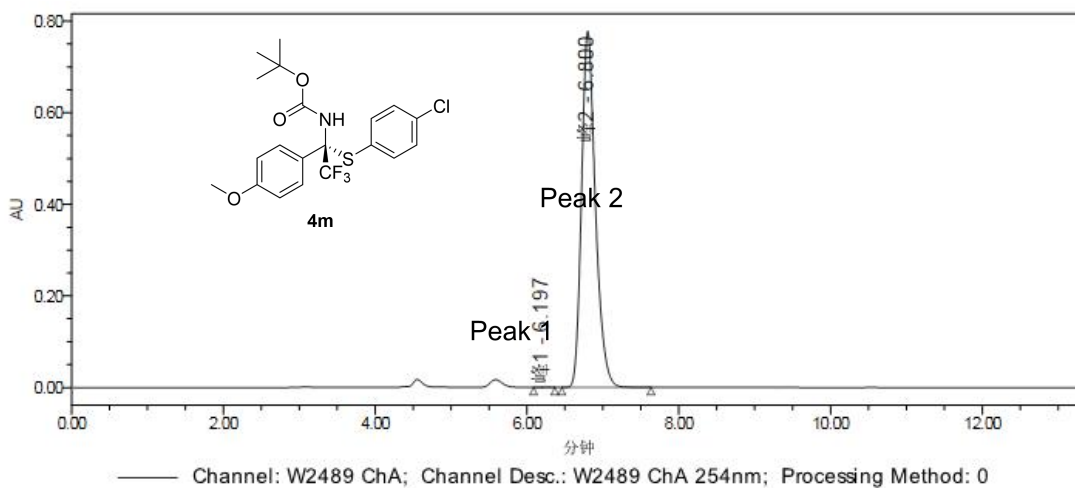

|   | Channel Description | Peak Name    | RT (min) | Area (峰*sec)<br>μAU*sec | % Area | Height (峰)<br>μAU |
|---|---------------------|--------------|----------|-------------------------|--------|-------------------|
| 1 | W2489 ChA 254nm     | 峰1<br>Peak 1 | 6.197    | 420                     | 0.00   | 52                |
| 2 | W2489 ChA 254nm     | 峰2<br>Peak 2 | 6.800    | 9866533                 | 100.00 | 777047            |

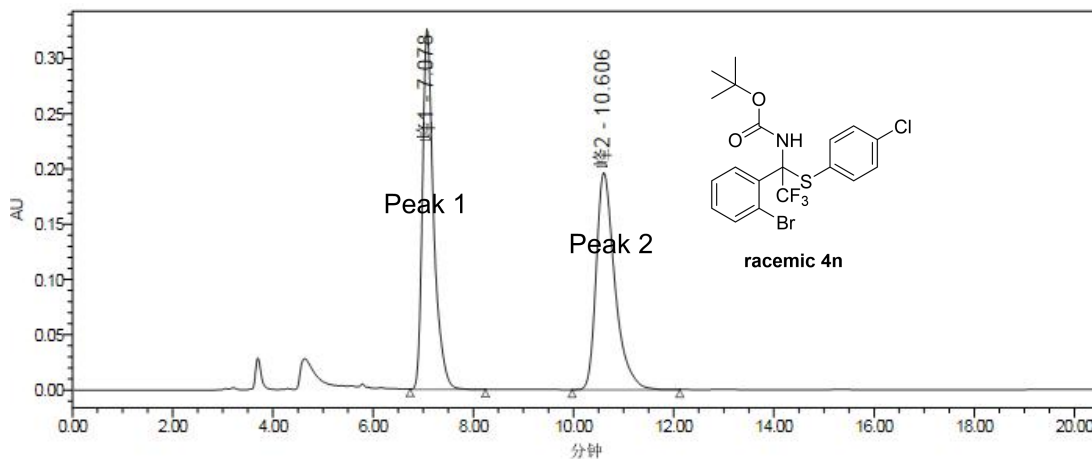

| Channel Description | Peak Name | RT (min) | Area (AU*sec) | % Area | Height (AU) |
|---------------------|-----------|----------|---------------|--------|-------------|
| W2489 ChA 254nm     | 峰1        | 7.078    | 5059177       | 49.85  | 325763      |
| W2489 ChA 254nm     | 峰2        | 10.606   | 5089818       | 50.15  | 196247      |

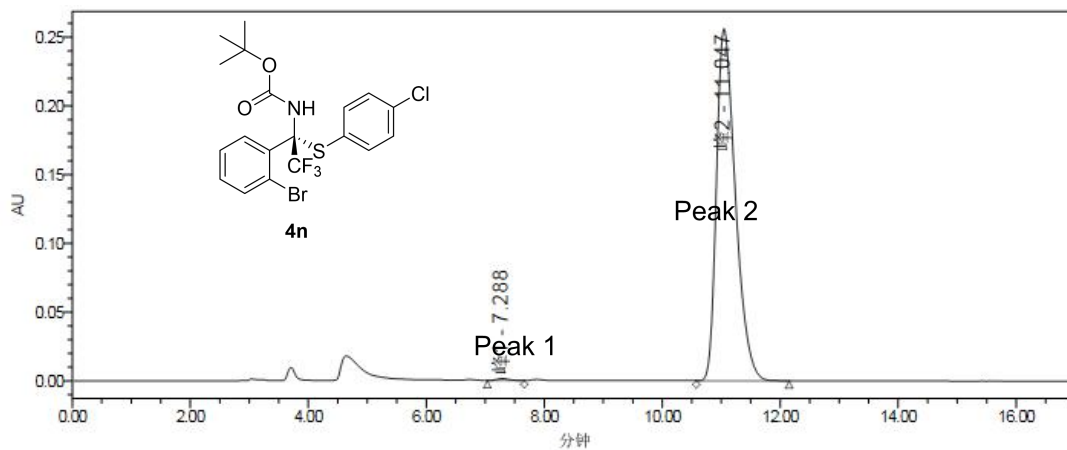

| Channel Description | Peak Name | RT (min) | Area (AU*sec) | % Area | Height (AU) |
|---------------------|-----------|----------|---------------|--------|-------------|
| W2489 ChA 254nm     | 峰1        | 7.288    | 20737         | 0.36   | 1494        |
| W2489 ChA 254nm     | 峰2        | 11.047   | 5707054       | 99.64  | 255738      |

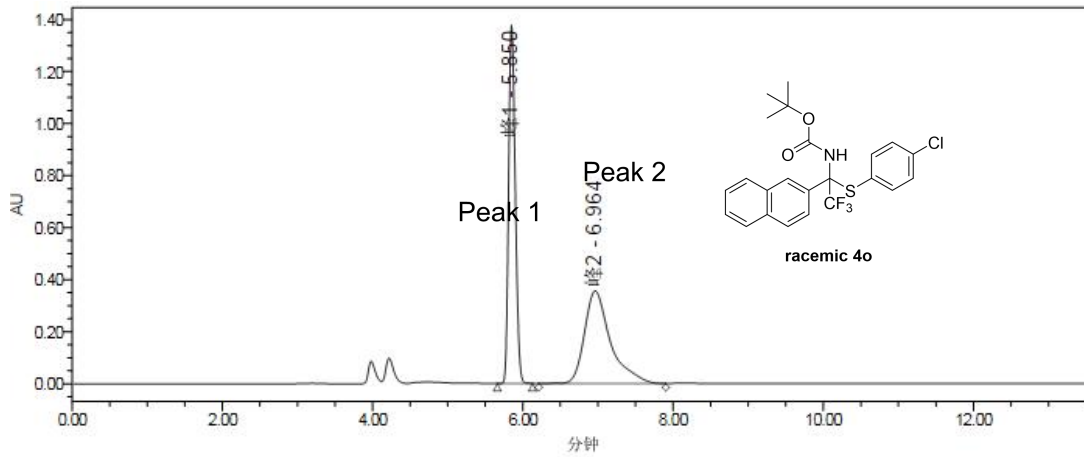

Channel: W2489 ChA; Channel Desc.: W2489 ChA 254nm; Processing Method: 0

|   | Channel Description | Peak Name    | RT (min) | Area (峰*sec)<br>μAU*sec | % Area | Height (峰)<br>μAU |
|---|---------------------|--------------|----------|-------------------------|--------|-------------------|
| 1 | W2489 ChA 254nm     | 峰1<br>Peak 1 | 5.850    | 8458689                 | 49.66  | 1375896           |
| 2 | W2489 ChA 254nm     | 峰2<br>Peak 2 | 6.964    | 8574334                 | 50.34  | 355909            |

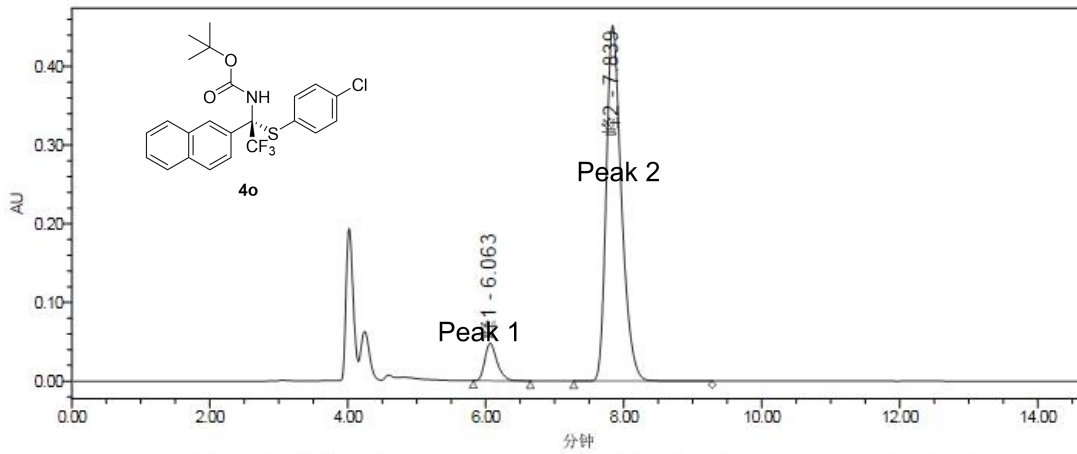

Channel: W2489 ChA; Channel Desc.: W2489 ChA 254nm; Processing Method: 0

|   | Channel Description | Peak Name    | RT (min) | Area (峰*sec)<br>μAU*sec | % Area | Height (峰)<br>μAU |
|---|---------------------|--------------|----------|-------------------------|--------|-------------------|
| 1 | W2489 ChA 254nm     | 峰1<br>Peak 1 | 6.063    | 586616                  | 7.82   | 47454             |
| 2 | W2489 ChA 254nm     | 峰2<br>Peak 2 | 7.839    | 6911303                 | 92.18  | 451453            |

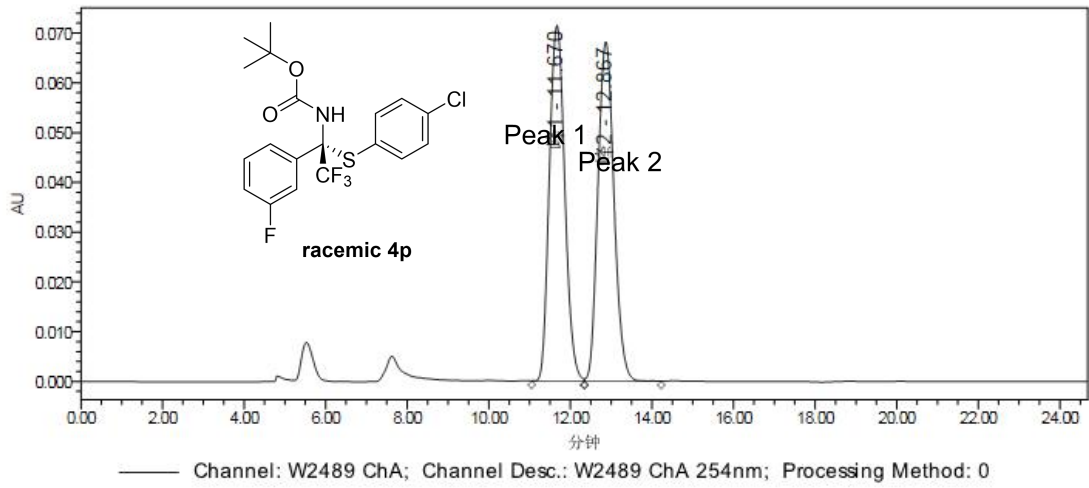

|   | Channel Description | Peak Name | RT (min) | Area (AU*sec) | % Area | Height (AU) |
|---|---------------------|-----------|----------|---------------|--------|-------------|
| 1 | W2489 ChA 254nm     | 峰1        | 11.670   | 1877466       | 50.15  | 71427       |
| 2 | W2489 ChA 254nm     | 峰2        | 12.867   | 1866068       | 49.85  | 68160       |

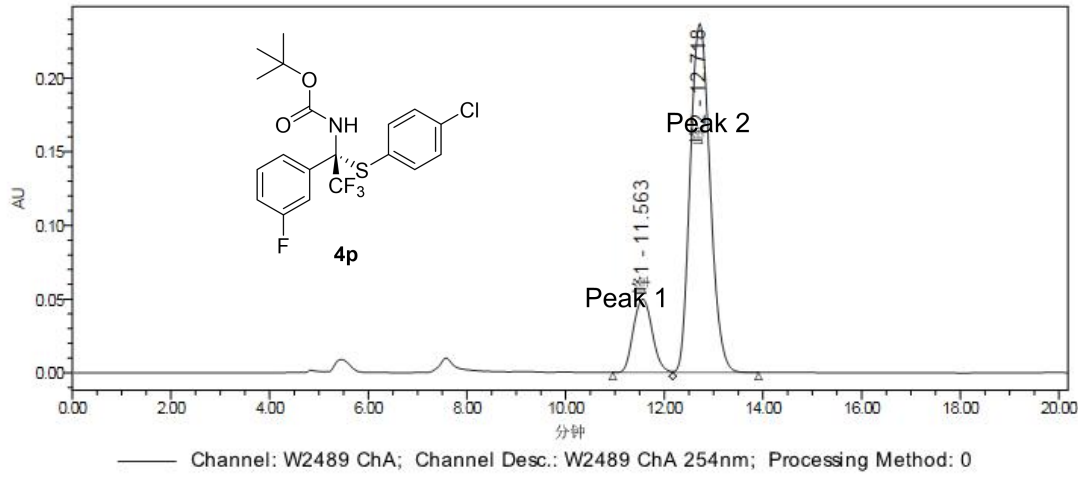

|   | Channel Description | Peak Name | RT (min) | Area (AU*sec) | % Area | Height (AU) |
|---|---------------------|-----------|----------|---------------|--------|-------------|
| 1 | W2489 ChA 254nm     | 峰1        | 11.563   | 1321132       | 16.64  | 49667       |
| 2 | W2489 ChA 254nm     | 峰2        | 12.718   | 6616103       | 83.36  | 236548      |

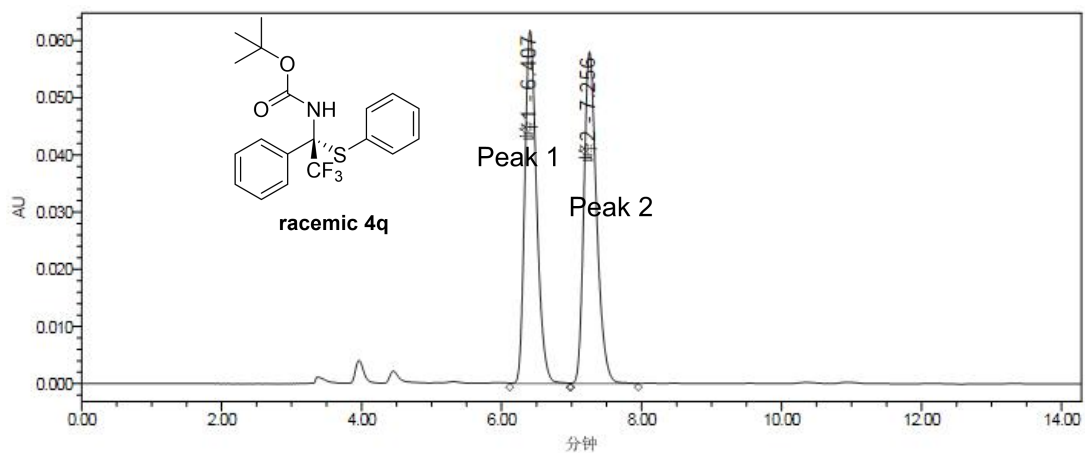

Channel: W2489 ChA; Channel Desc.: W2489 ChA 254nm; Processing Method: 0

|   | Channel Description | Peak Name | RT (min) | Area (AU*sec) | % Area | Height (AU) |
|---|---------------------|-----------|----------|---------------|--------|-------------|
| 1 | W2489 ChA 254nm     | 峰1        | 6.407    | 726615        | 49.91  | 61663       |
| 2 | W2489 ChA 254nm     | 峰2        | 7.256    | 729265        | 50.09  | 57931       |

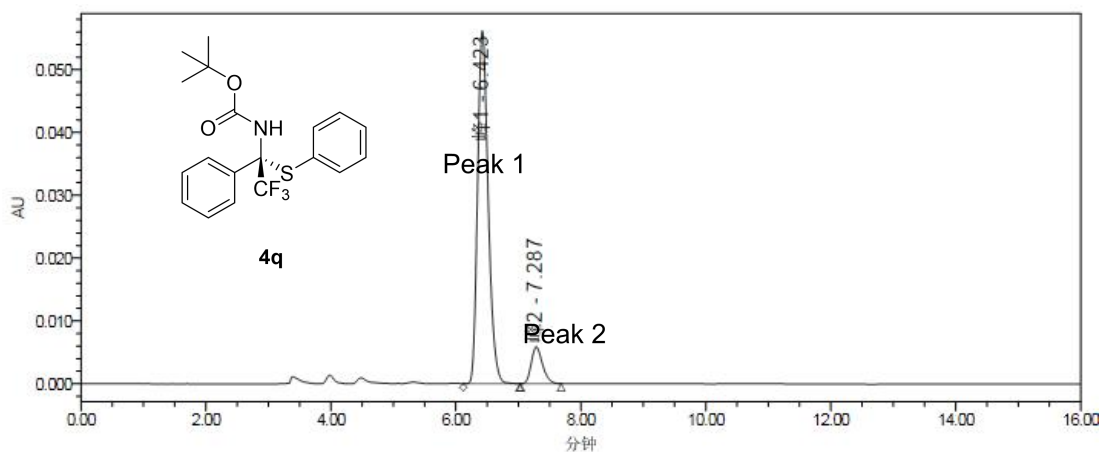

Channel: W2489 ChA; Channel Desc.: W2489 ChA 254nm; Processing Method: 0

|   | Channel Description | Peak Name | RT (min) | Area (AU*sec) | % Area | Height (AU) |
|---|---------------------|-----------|----------|---------------|--------|-------------|
| 1 | W2489 ChA 254nm     | 峰1        | 6.423    | 660947        | 90.02  | 56100       |
| 2 | W2489 ChA 254nm     | 峰2        | 7.287    | 73237         | 9.98   | 5830        |

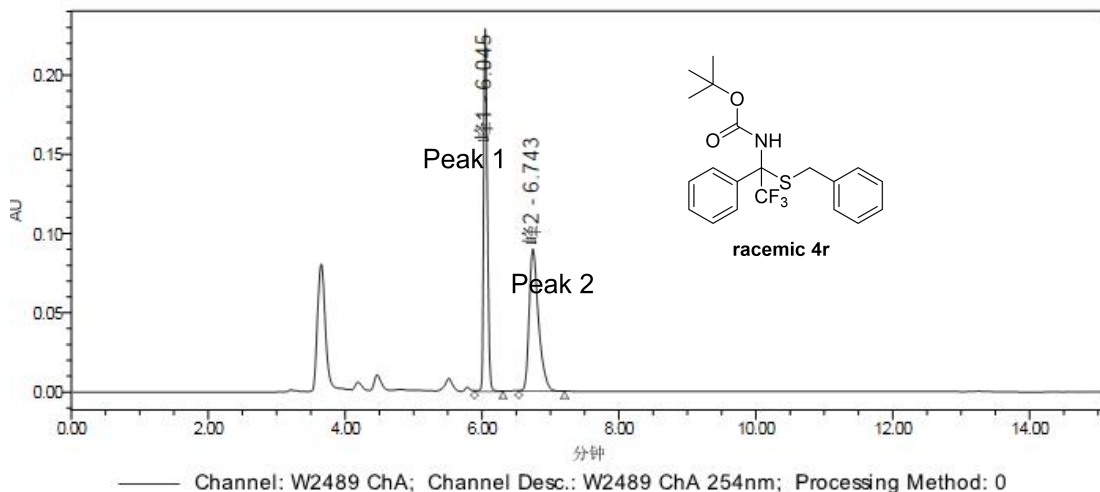

|   | Channel Description | Peak Name | RT (min) | Area (峰*sec)<br>μAU*sec | % Area | Height (峰)<br>μAU |
|---|---------------------|-----------|----------|-------------------------|--------|-------------------|
| 1 | W2489 ChA 254nm     | 峰1        | 6.045    | 867882                  | 50.38  | 228688            |
| 2 | W2489 ChA 254nm     | 峰2        | 6.743    | 854923                  | 49.62  | 89492             |

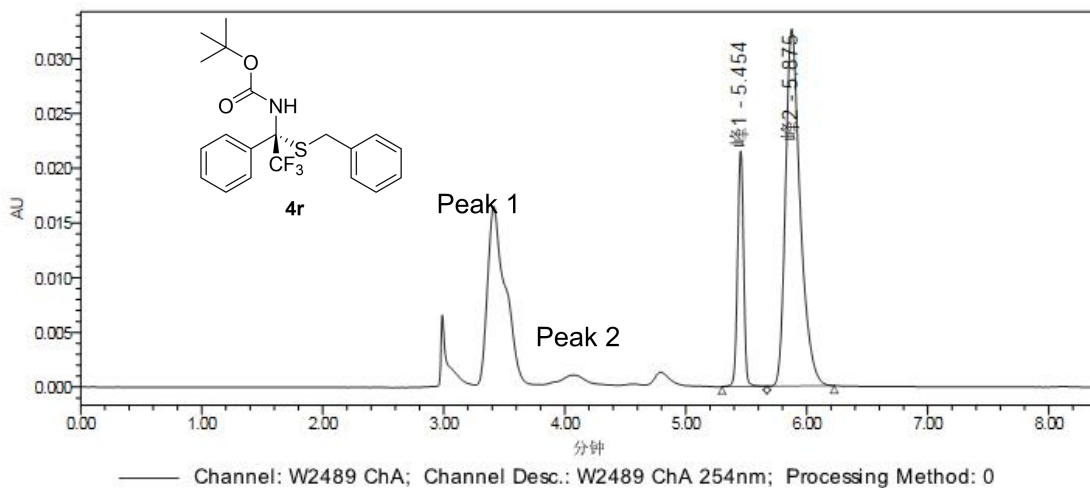

|   | Channel Description | Peak Name | RT (min) | Area (峰*sec)<br>μAU*sec | % Area | Height (峰)<br>μAU |
|---|---------------------|-----------|----------|-------------------------|--------|-------------------|
| 1 | W2489 ChA 254nm     | 峰1        | 5.454    | 47199                   | 21.38  | 21499             |
| 2 | W2489 ChA 254nm     | 峰2        | 5.875    | 275530                  | 78.62  | 32575             |

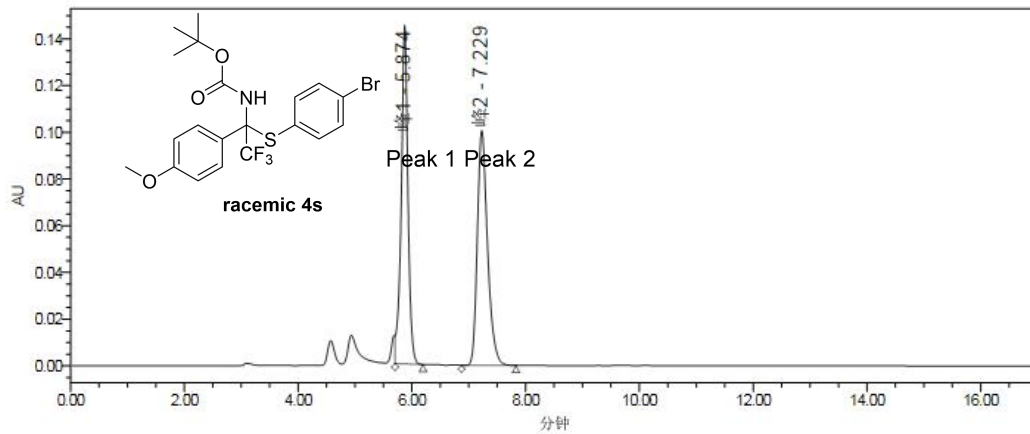

Channel: W2489 ChA; Channel Desc.: W2489 ChA 254nm; Processing Method: 0

|   | Channel Description | Peak Name    | RT (min) | Area (峰*sec)<br>μAU*sec | % Area | Height (峰)<br>μAU |
|---|---------------------|--------------|----------|-------------------------|--------|-------------------|
| 1 | W2489 ChA 254nm     | 峰1<br>Peak 1 | 5.874    | 1184856                 | 48.71  | 144816            |
| 2 | W2489 ChA 254nm     | 峰2<br>Peak 2 | 7.229    | 1247607                 | 51.29  | 100406            |

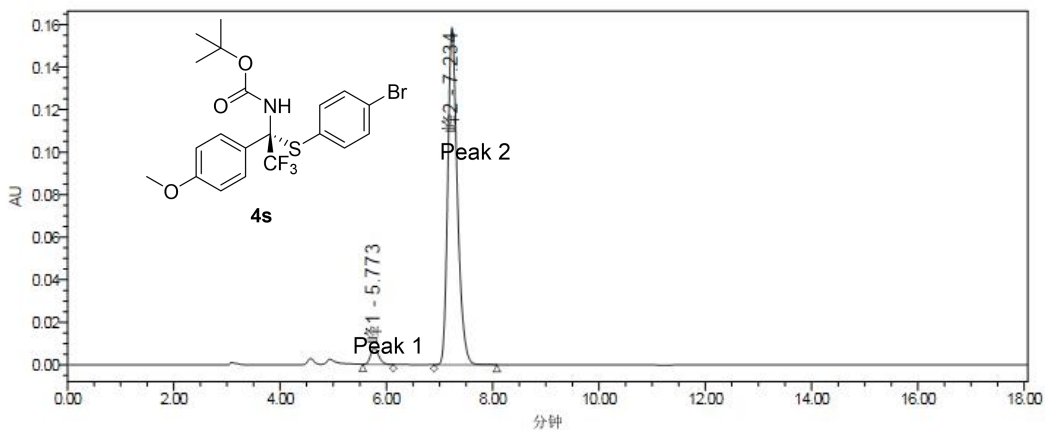

Channel: W2489 ChA; Channel Desc.: W2489 ChA 254nm; Processing Method: 0

|   | Channel Description | Peak Name    | RT (min) | Area (峰*sec)<br>μAU*sec | % Area | Height (峰)<br>μAU |
|---|---------------------|--------------|----------|-------------------------|--------|-------------------|
| 1 | W2489 ChA 254nm     | 峰1<br>Peak 1 | 5.773    | 82905                   | 4.00   | 7754              |
| 2 | W2489 ChA 254nm     | 峰2<br>Peak 2 | 7.234    | 1990182                 | 96.00  | 158393            |

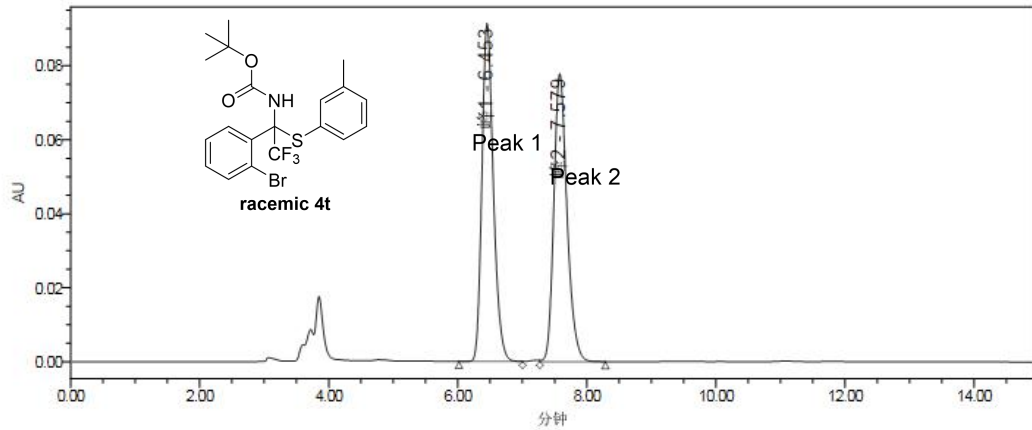

Channel: W2489 ChA; Channel Desc.: W2489 ChA 254nm; Processing Method: 0

|   | Channel Description | Peak Name    | RT (min) | Area (AU*sec) | % Area | Height (AU) |
|---|---------------------|--------------|----------|---------------|--------|-------------|
| 1 | W2489 ChA 254nm     | 峰1<br>Peak 1 | 6.453    | 1123792       | 50.55  | 91241       |
| 2 | W2489 ChA 254nm     | 峰2<br>Peak 2 | 7.579    | 1099481       | 49.45  | 77773       |

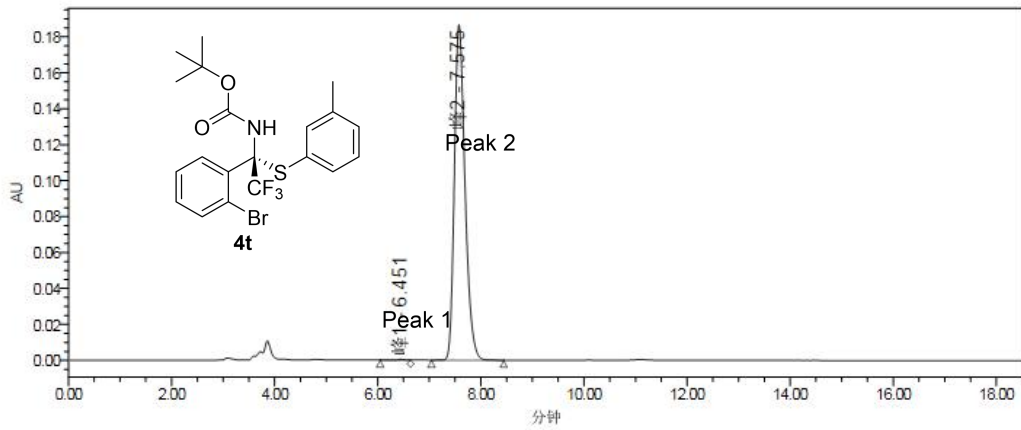

Channel: W2489 ChA; Channel Desc.: W2489 ChA 254nm; Processing Method: 0

|   | Channel Description | Peak Name    | RT (min) | Area (AU*sec) | % Area | Height (AU) |
|---|---------------------|--------------|----------|---------------|--------|-------------|
| 1 | W2489 ChA 254nm     | 峰1<br>Peak 1 | 6.451    | 4640          | 0.17   | 399         |
| 2 | W2489 ChA 254nm     | 峰2<br>Peak 2 | 7.575    | 2675570       | 99.83  | 186494      |



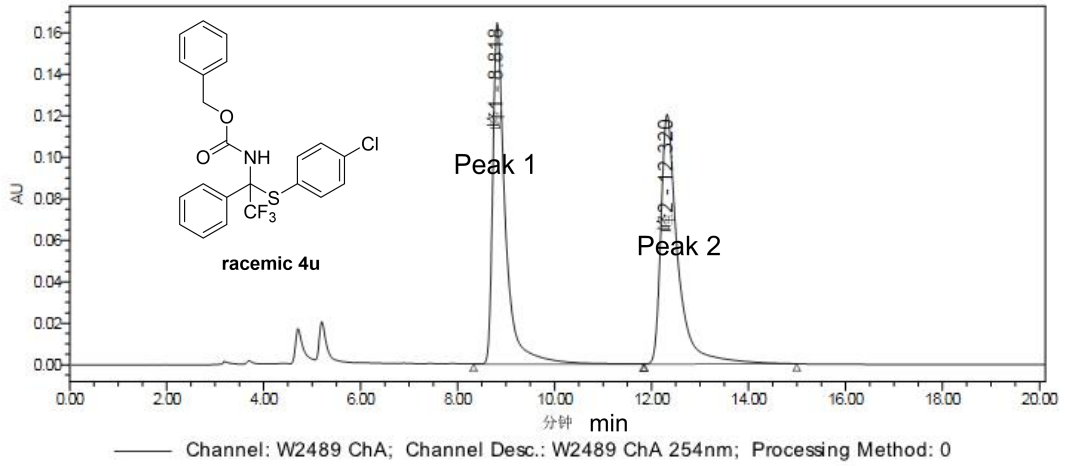

|   | Channel Description | Peak Name    | RT (min) | Area (AU·sec) | % Area | Height (AU) |
|---|---------------------|--------------|----------|---------------|--------|-------------|
| 1 | W2489 ChA 254nm     | 峰1<br>Peak 1 | 8.818    | 2953489       | 50.25  | 164225      |
| 2 | W2489 ChA 254nm     | 峰2<br>Peak 2 | 12.320   | 2924396       | 49.75  | 120260      |

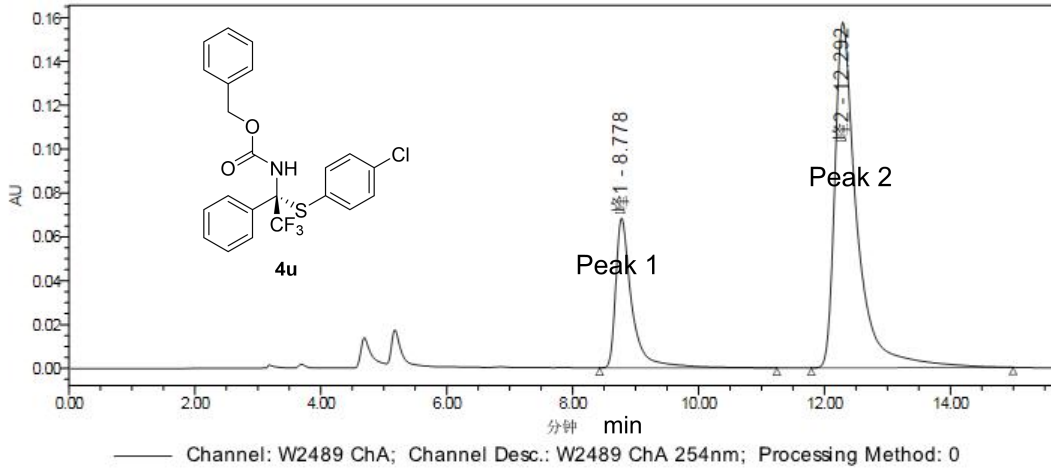

|   | Channel Description | Peak Name    | RT (min) | Area (AU·sec) | % Area | Height (AU) |
|---|---------------------|--------------|----------|---------------|--------|-------------|
| 1 | W2489 ChA 254nm     | 峰1<br>Peak 1 | 8.778    | 1217642       | 24.03  | 68157       |
| 2 | W2489 ChA 254nm     | 峰2<br>Peak 2 | 12.292   | 3849861       | 75.97  | 157401      |



|                                             |                                                               |
|---------------------------------------------|---------------------------------------------------------------|
| Index ranges                                | -10 ≤ h ≤ 10, -13 ≤ k ≤ 13, -9 ≤ l ≤ 16                       |
| Reflections collected                       | 5748                                                          |
| Independent reflections                     | 4007 [R <sub>int</sub> = 0.0147, R <sub>sigma</sub> = 0.0301] |
| Data/restraints/parameters                  | 4007/0/247                                                    |
| Goodness-of-fit on F <sup>2</sup>           | 1.028                                                         |
| Final R indexes [I ≥ 2σ (I)]                | R <sub>1</sub> = 0.0556, wR <sub>2</sub> = 0.1462             |
| Final R indexes [all data]                  | R <sub>1</sub> = 0.0744, wR <sub>2</sub> = 0.1635             |
| Largest diff. peak/hole / e Å <sup>-3</sup> | 0.37/-0.23                                                    |

## 12. References

1. M. Emilie, V. Anna Chiara, M. Michele, M. Andrea, Z. Paolo, B. Luca and F. Mariafrancesca, Catalytic highly enantioselective transfer hydrogenation of β-trifluoromethyl nitroalkenes. An easy and general entry to optically active β-trifluoromethyl amines, *Chem. Commun.*, 2015, **46**, 658-660.
2. (a) I. V. Kutovaya, O. I. Shmatova, V. M. Tkachuk, N. V. Melnichenko, M. V. Vovk and V. G. Nenajdenko, Aza-Henry Reaction with CF<sub>3</sub>-Ketimines: An Efficient Approach to Trifluoromethylated β-Nitroamines, 1,2-Diamines, α-Aminooximes, and Imidazolidinones, *Eur. J. Org. Chem.*, 2015, **2015**, 6749-6761. (b) M. Du, L. Yu, T. Du, Z. Li, Y. Luo, X. Meng, Z. Tian, C. Zheng, W. Cao and G. Zhao, N-Protecting group tuning of the enantioselectivity in Strecker reactions of trifluoromethyl ketimines to synthesize quaternary α-trifluoromethyl amino nitriles by ion pair catalysis, *Chem. Commun.*, 2020, **56**, 1581-1584.
3. (a) S. del Pozo, S. Vera, M. Oiarbide and C. Palomo, Catalytic Asymmetric Synthesis of Quaternary Barbituric Acids, *J. Am. Chem. Soc.*, 2017, **139**, 15308-15311. (b) M.-X. Zhao, H.-L. Bi, R.-H. Jiang, X.-W. Xu and M. Shi, Cinchona Alkaloid Squaramide/AgOAc Cooperatively Catalyzed Diastereo- and Enantioselective Mannich/Cyclization Cascade Reaction of Isocyanoacetates and Cyclic Trifluoromethyl Ketimines, *Org. Lett.*, 2014, **16**, 4566-4569. (c) W. Yang and D.-M. Du, Highly Enantioselective Michael Addition of Nitroalkanes to Chalcones Using Chiral Squaramides as Hydrogen Bonding Organocatalysts, *Org. Lett.*, 2010, **12**, 5450-5453. (d) V. Kumar and S. Mukherjee, Synergistic Lewis base and anion-binding catalysis for the enantioselective vinylogous addition of deconjugated butenolides to allenates, *Chem. Comm.*, 2013, **49**, 11203-11205. (e) Y. Qian, G. Ma, A. Lv, H.-L. Zhu, J. Zhao and V. H. Rawal, Squaramide-catalyzed enantioselective Friedel-Crafts reaction of indoles with imines, *Chem. Comm.*, 2010, **46**, 3004-3006. (f) P. S. Bhadury, Y. Zhang, S. Zhang, B. Song, S. Yang, D. Hu, Z. Chen, W. Xue and L. Jin, An effective route to fluorine containing asymmetric α-aminophosphonates using chiral Bronsted acid catalyst, *Chirality*, 2009, **21**, 547-557. (g) M. Hatano, T. Ikeno, T. Matsumura, S. Torii and K. Ishihara, Chiral lithium salts of phosphoric acids as lewis acid-base conjugate catalysts for the enantioselective cyanosilylation of ketones, *Adv. Synth. Catal.*, 2008, **350**, 1776-1780.
